# Supplementary material for: Impact of health behaviours and deprivation on well-being in a national sample of English young people
Source: PubMed Central journal article supplement (PMC6241972; doi:10.1136/bmjpo-2018-000335), 2018-11-09
Supplement: bmjpo-2018-000335.draft_revisions.pdf [file bmjpo-2018-000335.draft_revisions.pdf]

# BMJ Paediatrics Open

BMJ Paediatrics Open is committed to open peer review. As part of this commitment we make the peer review history of every article we publish publicly available.

When an article is published we post the peer reviewers' comments and the authors' responses online. We also post the versions of the paper that were used during peer review. These are the versions that the peer review comments apply to.

The versions of the paper that follow are the versions that were submitted during the peer review process. They are not the versions of record or the final published versions. They should not be cited or distributed as the published version of this manuscript.

BMJ Paediatrics Open is an open access journal and the full, final, typeset and author-corrected version of record of the manuscript is available on our site with no access controls, subscription charges or pay-per-view fees (<http://bmjpaedsopen.bmj.com>).

If you have any questions on BMJ Paediatrics Open's open peer review process please email [info.bmjpo@bmj.com](mailto:info.bmjpo@bmj.com)

**BMJ Paediatrics Open****The Impact of Health Behaviours and Deprivation on Wellbeing in a National Sample of English Young People**

|                               |                                                                                                                                                                                                                                                        |
|-------------------------------|--------------------------------------------------------------------------------------------------------------------------------------------------------------------------------------------------------------------------------------------------------|
| Journal:                      | <i>BMJ Paediatrics Open</i>                                                                                                                                                                                                                            |
| Manuscript ID                 | bmjpo-2018-000335                                                                                                                                                                                                                                      |
| Article Type:                 | Original article                                                                                                                                                                                                                                       |
| Date Submitted by the Author: | 14-Jun-2018                                                                                                                                                                                                                                            |
| Complete List of Authors:     | Gireesh, Aswathikutty; University College London, Institute of Child Health<br>Das, Shikta; University College London, Institute of Child Health<br>Viner, Russell; UCL Institute of Child Health, Population, Policy & Practice<br>Research Programme |
| Keywords:                     | Adolescent Health, Sleep, Nutrition                                                                                                                                                                                                                    |
|                               |                                                                                                                                                                                                                                                        |

SCHOLARONE™  
Manuscripts

Review Only

**TITLE**

1  
2 The Impact of Health Behaviours and Deprivation on Wellbeing in a National Sample of  
3  
4 English Young People  
5

6  
7  
8  
9 Aswathikutty Gireesh MSc. <sup>a\*</sup>

10  
11 Shikta Das PhD <sup>b\*</sup>

12  
13  
14 Russell Viner M.B.B.S., PhD <sup>a</sup>

15  
16  
17 \*Joint first authors

18  
19  
20 <sup>a</sup> UCL Great Ormond Street Institute of Child Health, Population, Policy and Practice  
21  
22 Programme, 30 Guilford Street, London WC1N 1EH, United Kingdom

23  
24  
25 <sup>b</sup> UCL Institute of Cardiovascular Science, MRC Unit for Lifelong Health and Ageing at UCL  
26  
27  
28  
29

30  
31 Address for correspondence:

32  
33 Aswathikutty Gireesh

34  
35  
36 Great Ormond Street Institute of Child Health, Population, Policy and Practice Programme.  
37  
38 30, Guilford Street, London WC1N 1EH, UK.

39  
40  
41 Email address: [a.aswathikutty-gireesh@ucl.ac.uk](mailto:a.aswathikutty-gireesh@ucl.ac.uk)  
42  
43  
44

**Funding Sources**

45  
46  
47  
48 This report is independent research commissioned and funded by the National Institute for  
49  
50 Health Research Policy Research Programme. The views expressed in this publication are  
51  
52 those of the author(s) and not necessarily those of the NHS, the National Institute for Health  
53  
54  
55  
56  
57  
58  
59  
60

Research, the Department of Health or its arm's length bodies, and other Government

Departments.

### **Conflicts of interests**

The authors have no conflicts of interest to disclose

**Word count:** 2574

Confidential: For Review Only

**ABSTRACT**

**Objective:** To determine the malleable factors influencing wellbeing in boys and girls by accounting for area-level deprivation, ethnicity and clustering within local authorities

**Methods:** We used data from a nationally-representative survey, the What About Youth (WAY) study involving 120,115 adolescents aged 15 years. Our outcome measure of mental wellbeing was the Warwick-Edinburgh Mental Wellbeing Scale (WEMWBS). The explanatory factors included potentially protective behaviours (sleep, reading and physical activity), risk behaviours (substance use, unhealthy eating habits and excessive screen time) and area-level deprivation. We ran unadjusted and adjusted multilevel models for each explanatory factor, adjusting for ethnicity, deprivation and including a random effect for a local authority (LA).

**Results:** Boys had a higher overall mean WEMWBS score than girls ( $P < 0.0001$ ). In the adjusted model, each of multiple risk behaviours, eating habits, sleep, bullying, physical activity, screen-time and reading were independently associated with mental wellbeing in both boy and girls ( $P < 0.0001$  for both). Sleep and eating behaviours had a stronger effect in both sexes than bullying, physical activity and screen time.

**Conclusion:** The largest contributors to adolescent wellbeing appear to be sleep, eating behaviours and bullying when considered in a multivariable framework. Future longitudinal studies and health policies need to consider range of behavioural factors to drive improve improvements in adolescent wellbeing.

**Keywords:** Adolescent, Young People, Mental Wellbeing, Health Behaviours

1  
2  
3  
4  
5  
6  
7  
8  
9  
10  
11  
12  
13  
14  
15  
16  
17  
18  
19  
20  
21  
22  
23  
24  
25  
26  
27  
28  
29  
30  
31  
32  
33  
34  
35  
36  
37  
38  
39  
40  
41  
42  
43  
44  
45  
46  
47  
48  
49  
50  
51  
52  
53  
54  
55  
56  
57  
58  
59  
60

There are growing concerns about the wellbeing of young people in modern societies particularly in the UK where there is evidence that young people's wellbeing is lower than in many comparable developed countries<sup>1-3</sup>. Wellbeing is defined as “the state of being comfortable, healthy or happy”<sup>4</sup>. From a holistic perspective, wellbeing incorporates different dimensions of adolescent lives including social relationships as well as individual functioning<sup>5</sup>. However, the determinants of adolescent wellbeing is a relatively understudied area in comparison with the large literature on factors associated with mental health problems, as wellbeing concept has only been on greater focus over the past two decades<sup>6,7</sup>. A wide range of factors have been shown to be related to adolescent wellbeing, including a range cognitive and relational factors such as bullying<sup>8</sup> family structure and relationships<sup>9</sup>, peer support<sup>10</sup> and school connectedness<sup>11</sup>. Other behaviours also influence wellbeing, including substance use (alcohol, drugs and smoking habits)<sup>12-14</sup>, fruit and vegetable consumption<sup>15,16</sup>, breakfast consumption<sup>17</sup>, physical activity<sup>18</sup>, sleep duration<sup>19</sup>, sedentary behaviour<sup>20,21</sup> and leisure time activities<sup>22</sup>. However, published studies use a wide range of wellbeing measures, resulting in conflicting findings<sup>23-26</sup>. Furthermore, studies have largely focused on single risk factors and not explored how a wide range of risk factors including behavioural factors influence wellbeing. Additionally, given that many such behaviours are strongly socially patterned, studies have thus far paid little attention to how potential risk factors are confounding by socioeconomic position and issues relating to the clustering of behaviours and wellbeing within localities.

Policy initiatives to improve wellbeing and mental health amongst young people have largely focused upon cognitive and psychological factors related to resilience to adversity, and have paid little attention to the contribution of non-psychological modifiable factors, such as other lifestyle behaviours. Understanding the potential contribution of modifiable behavioural factors to adolescent wellbeing may inform different strategies to improve young people's wellbeing<sup>27</sup>.

We used a very large recent nationally-representative and population-based survey of English 15 year-olds to examine the contribution of individual-level modifiable behaviours to wellbeing, including potentially protective (sleep, reading and physical activity) and risk behaviours (substance use, unhealthy eating habits and excessive screen time). Our objective was to identify modifiable behavioural factors for mental wellbeing in boys and girls using an adolescent-specific measure and accounting for deprivation, ethnicity and clustering within local authorities (LAs).

## Methods

### Study design and sample

The What About Youth study (WAY) is a large-scale youth-oriented survey funded by Department of Health (DH) in England and carried out by NHS Digital in 2014<sup>28</sup>. The primary aim of the survey was to collect robust local authority level data on youth health behaviours and general health to improve their health outcomes. Study participants were born between 01/09/1998 and 31/08/1999 and turned 15 years old in the academic year 2013/14. A random sampling methodology was employed to draw 298,080 participants from the National Pupil Database (NPD). The sample size was calculated to attain 1000 young people in each of 152 LAs in England with 2 LAs were merged with their nearest neighbours due to small size.

The analysis sample was 120,115 individuals, of whom 16% responded online and 84% via postal means (2,835 opted out). The response rates differed by gender, with adjusted response rates of 35% in boys and 49% in girls, and by deprivation, ethnicity and LA. Non-response weights using these factors were calculated to provide alignment between the achieved and target samples and these weights were used in our analyses. We obtained a fully anonymised cohort data electronically from the United Kingdom (UK) Data Service website<sup>28</sup>

## Measures

1  
2 Mental wellbeing was measured using the Warwick-Edinburgh Mental Wellbeing Scale  
3  
4 (WEMWBS), a 14 item population-level measure<sup>29</sup>. It is validated to use in adolescents' age  
5  
6 13 or more and focus primarily on positive aspects of mental wellbeing. Participants indicate  
7  
8 how often they feel like each of the 14 items using a 5-point scale that ranges from 5 "all the  
9  
10 time" to 1 "none of the time"<sup>30</sup>. Total scores ranged from 14-70 and were calculated by  
11  
12 summing each participant's responses. The potential explanatory behavioural variables were  
13  
14 identified from the literature review of previous publication. A detail description of each  
15  
16 variable is given in appendix A of supplementary material.  
17  
18  
19  
20  
21

22 A composite variable for risk behaviour index for substance use was constructed by the  
23  
24 summation of three dichotomous risk behaviour variables: (a) Smoking: If currently smokes  
25  
26 (b) Drinking alcohol: If drinks once a month or more frequently (c) Cannabis use: If ever  
27  
28 tried cannabis. Based on the combination of risk behaviours, the composite score was  
29  
30 categorised as 0= none, 1= only one, 2 =any two and 3 =all three. Similarly, composite  
31  
32 unhealthy eating habit index was derived from (a) Skipping Breakfast: If avoided breakfast in  
33  
34 last 7 days (b) Poor diet: If consumed less than 5 portions of fruits and vegetables a day (c)  
35  
36 Takeaway food: If consumed takeaway food in past 7 days. Based on a combination of  
37  
38 unhealthy behaviours, the composite score was categorised into 0= none, 1= only one, 2 =any  
39  
40 two and 3 =all three. Physical active for 60+ minutes for at least 5 days were classified as  
41  
42 "physically active" and the rest "physically inactive." This threshold was defined in line with  
43  
44 government recommendations<sup>31 32</sup>, except for the intensity of exercise which was not  
45  
46 available in the dataset. The selected threshold of activity level was taken at 5 days a week,  
47  
48 as only 13% reported being physically active for 7 days a week. A screen time variable was  
49  
50 computed based on reported weekend and weekday usage of television, internet, smartphone  
51  
52 and computer games. Subjects were categorised into "≥7hrs/day", "About 5-6 hours/day",  
53  
54  
55  
56  
57  
58  
59  
60



“About 3 -4 hours/day”, “About 2 hrs/day” and “ $\leq 1$ hrs/day”. Time spent reading on weekends and weekdays and the response options ranged from none to seven hours per day. We recoded the variable as “none”, about half an hour/day”, “about 1 hour/day” and “2 hours /day”. The frequency of eight hours sleep in the last seven days was coded as “every day”, “most days”, “and some days” and “not in the past 7 days”. Bullying was measured with Olweus Bully/Victim Questionnaire, a reliable 8-item scale used to assess the bullying victimisation<sup>33</sup>. We combined responses to create one overall measure of bullying experience (yes/no). In line with previous studies<sup>34</sup>, adolescents who were bullied more than “two or three times a month” were categorised as bullying victims.

Ethnicity, area deprivation, and mode of questionnaire completion were selected as confounders in the relationship between wellbeing and potential explanatory variables as shown in previous studies<sup>35</sup>. Ethnicity was self-identified by participants’ and was an adaptation of the 2001 UK census categories, supplemented by questions on the national group. English Index of Multiple Deprivation (IMD) was used as a measure of relative deprivation for small areas<sup>36</sup>. The IMD scores were divided into three deprivation categories defined by quintiles of the national distribution: 1 and 2 (high deprivation), 3 (average), 4 and 5 (low deprivation). The participants were allowed to choose either online or postal modes of questionnaire completion.

### **Statistical Analyses**

We conducted unadjusted and adjusted multilevel regression, in Stata 14 (Stata Corp, College Station, TX). For wellbeing scores, the interaction between gender and health behaviours was statistically significant ( $p < 0.001$ ) and therefore, analyses were stratified by gender. All variables were plotted to check the distribution and normality was checked with

1 Kolmogorov-Smirnov (K-S) test. All estimates were weighted by representativeness of  
2 participants to compensate for the disproportionate selection of sample and non-response  
3 bias. Spearman  $\chi^2$  tests were used to compare the distribution of explanatory variables by  
4 gender. An unadjusted analysis was run to test the association between each independent  
5 variable (substance use, unhealthy eating habits, screen time, reading, bullying, physical  
6 activity and sleeping hours) and outcome adolescent wellbeing (Model 1). The analyses were  
7 repeated in a multivariable analysis where ethnicity, mode of questionnaire delivery and IMD  
8 were added as confounders between each risk factor and outcome (Model 2). In model 3, all  
9 explanatory factors and covariates were included simultaneously to obtain associations  
10 between each variable and wellbeing scores after adjusting for confounder, and other  
11 explanatory variables were presented. LAs were treated as random effects in all models.  
12 Models were also tested for significant quadratic terms signifying curvilinear relationships;  
13 this was only significant for reading. The intraclass correlations coefficient (ICC), being the  
14 proportion of total variance attributable to differences at the LA level, was estimated using  
15 multilevel models for wellbeing with adjustment for IMD and ethnicity and mode of  
16 completion.

## 36 Results

37  
38  
39  
40 In total, 47.8% boys and 52.2% of girls participated in the study (Table A1). Of these, boys  
41 had higher average wellbeing score in comparison to girls. The intraclass correlation  
42 coefficient (ICC) for the wellbeing score was 0.003 in both boys and girls suggesting that  
43 variance in adolescent wellbeing is small at local authority level.

44  
45  
46  
47  
48  
49 Table A1 shows that there were significant differences in the distribution of explanatory  
50 variables between boys and girls. Girls had higher risk factors such as substance use,  
51 unhealthy eating habits, screen time and reported more bullying than boys. Protective  
52  
53  
54  
55

variables such as sleeping hours (more than 8 hours) and reading were also significantly higher in girls than in boys.

All explanatory variable and IMD significantly associated with wellbeing in both sexes (Table A2). Wellbeing in both sexes decreased with use of substance use, unhealthy eating habits, bullying and physical activity and longer screen time in both sexes. Protective factors, such as, sleeping more than eight hours and reading more than two hours associated with higher wellbeing in both sexes.

In the adjusted multivariable models adjusted for covariates (Table A3), poorer wellbeing was associated with multiple substances use and multiple unhealthy eating habits in a dose-dependent fashion. Being physically inactive, longer screen time and experiencing bullying were both associated with decrements in wellbeing in both sexes, with the association being stronger in girls than in boys.

Higher wellbeing was associated with number of days young people achieved more than eight hours of sleep again in a dose-dependent fashion. Habitual reading most days was associated with higher wellbeing although there was no evidence of a dose-response above 30 minutes per day in the fully adjusted model (Figure 1). Young people from black ethnic groups had significantly higher wellbeing in both sexes. Deprivation was not associated with wellbeing amongst boys but was amongst girls.

## Discussion

This study broadens our understanding of risk and protective factors associated with wellbeing in adolescence, using a very large nationally representative survey to examine a wide spectrum of behavioural and psychosocial factors relating to youth wellbeing and taking into account deprivation and clustering at local authority level. The study shows that young people who reported lower levels of wellbeing were more likely to have engaged in multiple

1  
2  
3  
4  
5  
6  
7  
8  
9  
10  
11  
12  
13  
14  
15  
16  
17  
18  
19  
20  
21  
22  
23  
24  
25  
26  
27  
28  
29  
30  
31  
32  
33  
34  
35  
36  
37  
38  
39  
40  
41  
42  
43  
44  
45  
46  
47  
48  
49  
50  
51  
52  
53  
54  
55  
56  
57  
58  
59  
60

unhealthy eating habits and substance use; be victims of bullying; have exercised insufficiently; have exceeded recommended screen time use. These findings were robust to mutual adjustment for all variables and for deprivation, ethnicity and mode of questionnaire delivery. A dose-response pattern was also observed between wellbeing and health behaviours such as substance use, unhealthy eating habits and sleeping pattern. A decrease in the number of risk behaviours and increase in the number of days slept for more than eight hours, corresponded with an increase in average levels of wellbeing. The impact of deprivation on wellbeing was surprisingly small, as was local authority locality variance, suggesting that variance in wellbeing lies largely in individual behavioural and school factors which was unavailable in this dataset.

Since different studies have used different variables to define various aspects of wellbeing in the analyses, comparison with other studies is difficult. We found boys reported higher mean wellbeing than girls, consistent with national reports for England<sup>37 38</sup>, but in contrast to findings from recent Health Survey England (HSE) 2015, where only slight gender variations were observed<sup>39</sup>. The proportions reporting each of the behaviours were broadly similar to those found in other recent national surveys<sup>27 40</sup>. Girls reported higher levels of risky health behaviours including current smoking, alcohol consumption, bullying, on the other hand, boys were more likely to report higher levels of physical activity and these trends were consistent with findings from the Health Behaviour in School-aged Children (HBSC) England study<sup>41</sup>.

These findings corroborate with two previous studies where happiness as a marker of wellbeing was found to be positively associated with multiple health protective behaviours (sport's participation and healthier eating ) and negatively associated with multiple risk behaviours (smoking, alcohol use and heavy screen use) in adolescents<sup>42 43</sup>. Our finding that substance use was associated with lower wellbeing is similar to that seen in other studies, as were our findings for being bullied<sup>35</sup>. The association of sleep duration and reading with

wellbeing in young people has been little studied. Leisure time and adequate sleep have been identified as being associated with wellbeing<sup>19,22</sup>, however, ours is the first to examine these alongside other behavioural and psychological factors.

We found an association between deprivation and lower wellbeing, although in contrast to previous studies<sup>27</sup> the effect size was small and we found no association in boys. This may reflect the lack of adjustment for multiple behaviours, ethnicity and area effects in other studies. Our finding suggests that much of what has previously been understood as deprivation effects may be mediated by unhealthy behaviours themselves associated with deprivation. We found that young people black ethnic groups reported significantly higher wellbeing in both sexes, consistent with previous UK findings<sup>25</sup>. However, the reasons for this remain unclear and require further study. We found this association to be robust to adjustment for deprivation and all significant behavioural and psychological factors, suggesting this likely relates to factors not measured in our study.

We used a large, nationally representative sample of ethnically and socioeconomically diverse adolescents. Prior studies have examined very few health behaviours and relied on proxy measures of wellbeing rather than on population-level wellbeing measures that tap into both feelings and psychological flourishing. In our study, the associations between wellbeing and behavioural factors were examined within a multivariable and multilevel framework, using a validated wellbeing scale with robust psychometric properties.

Our findings are subject to a number of limitations. Our data were cross-sectional, and thus the direction of causality is unclear for the behavioural variables studied. Participant responses could be influenced by social desirability, and those with poor wellbeing may be inclined towards endorsing questions more than others, thus introducing bias. The direction

of such biases is unclear, however, we note that girls (who had a higher response rate in the overall survey) reported higher levels of both more risky and protective behaviours than boys, potentially reflecting social desirability biases. All variables used were by self-reported except for area-level deprivation. We have also repeated analysis excluding the outliers, and that did not materially affect the findings. We used bullying victimization as a proxy for psychological problems due to the lack of more appropriate variables in the dataset; thus it is possible that some of the associations seen here result from inadequate adjustment for psychological issues. We combined variables across domains into composite variables; this may have introduced bias although the direction of bias is unclear.

## Conclusions

Our findings suggest that promoting healthy sleep, reading, and healthy eating behaviours may present important policy targets for enhancing adolescent well-being in addition to more accepted foci on physical activity, screen time and bullying. Future work is needed to examine these factors within a longitudinal causal framework.

1  
2 **What is already known on this topic?**  
3

4  
5 Young people's wellbeing may be affected by multiple individual and contextual factors.  
6

7  
8 Key determinants of adolescent wellbeing remain unclear  
9

10  
11 Few studies have examined a wide range of potential determinants whilst adjusting for area-level  
12  
13 deprivation.  
14

15 **What this study adds?**  
16

17  
18 Findings support current policy foci on bullying, physical activity, and screen-time as correlates of  
19  
20 wellbeing amongst young people  
21  
22

23  
24 Sleep and eating behaviours may also be important policy targets for promoting adolescent wellbeing.  
25

26  
27 A coherent policy framework to promote adolescent wellbeing needs to be multifaceted and consider a  
28  
29 range of health factors in young people's lives  
30  
31  
32  
33  
34  
35  
36  
37  
38  
39  
40  
41  
42  
43  
44  
45  
46  
47  
48  
49  
50  
51  
52  
53  
54  
55  
56  
57  
58  
59  
60

## References

1. James S, Hale L. Sleep Duration and Child Wellbeing: A Nonlinear Association. *Journal of clinical child and adolescent psychology : the official journal for the Society of Clinical Child and Adolescent Psychology, American Psychological Association, Division 53* 2017;46(2):258-68. doi: 10.1080/15374416.2016.1204920
2. RCPCH. State of Child Health Report Royal College of Paediatrics and Child Health; 2017 [Available from: <http://www.thehealthwell.info/node/1062390> accessed 6th November 2017.
3. Patton GC, Sawyer SM, Santelli JS, et al. Our future: a Lancet commission on adolescent health and wellbeing. *Lancet (London, England)* 2016;387(10036):2423-78. doi: 10.1016/s0140-6736(16)00579-1 [published Online First: 2016/05/14]
4. Oxford University Press. Oxford Dictionary. Oxford: Oxford University Press 2016.
5. Žukauskienė R. Adolescence and Well-Being. In: Ben-Arieh A, Casas F, Frønes I, et al., eds. Handbook of Child Well-Being: Theories, Methods and Policies in Global Perspective. Dordrecht: Springer Netherlands 2014:1713-38.
6. Keyes CL. Promoting and protecting mental health as flourishing: a complementary strategy for improving national mental health. *The American psychologist* 2007;62(2):95-108. doi: 10.1037/0003-066x.62.2.95 [published Online First: 2007/02/28]
7. Das JK, Salam RA, Lassi ZS, et al. Interventions for Adolescent Mental Health: An Overview of Systematic Reviews. *Journal of Adolescent Health* 2016;59(4, Supplement):S49-S60. doi: <https://doi.org/10.1016/j.jadohealth.2016.06.020>
8. Landstedt E, Persson S. Bullying, cyberbullying, and mental health in young people. *Scandinavian journal of public health* 2014;42(4):393-9. doi: 10.1177/1403494814525004 [published Online First: 2014/03/13]



9. Dinisman T, Andresen S, Montserrat C, et al. Family structure and family relationship from the child well-being perspective: Findings from comparative analysis. *Children and Youth Services Review* 2017;80(Supplement C):105-15. doi: <https://doi.org/10.1016/j.chidyouth.2017.06.064>
10. Raja SN, McGee R, Stanton WR. Perceived attachments to parents and peers and psychological well-being in adolescence. *Journal of Youth and Adolescence* 1992;21(4):471-85. doi: 10.1007/bf01537898
11. García Bacete FJ, Marande Perrin G, Schneider BH, et al. Effects of School on the Well-Being of Children and Adolescents. In: Ben-Arieh A, Casas F, Frønes I, et al., eds. *Handbook of Child Well-Being: Theories, Methods and Policies in Global Perspective*. Dordrecht: Springer Netherlands 2014:1251-305.
12. Farmer S, Hanratty B. The relationship between subjective wellbeing, low income and substance use among schoolchildren in the north west of England: a cross-sectional study. *Journal of Public Health* 2012;34(4):512-22. doi: 10.1093/pubmed/fds022
13. Phillips-Howard PA, Bellis MA, Briant LB, et al. Wellbeing, alcohol use and sexual activity in young teenagers: findings from a cross-sectional survey in school children in North West England. *Substance abuse treatment, prevention, and policy* 2010;5:27. doi: 10.1186/1747-597x-5-27 [published Online First: 2010/11/12]
14. Taylor G, McNeill A, Girling A, et al. Change in mental health after smoking cessation: systematic review and meta-analysis. *BMJ : British Medical Journal* 2014;348 doi: 10.1136/bmj.g1151
15. Conner TS, Brookie KL, Carr AC, et al. Let them eat fruit! The effect of fruit and vegetable consumption on psychological well-being in young adults: A randomized controlled trial. *PLoS ONE* 2017;12(2):e0171206. doi: 10.1371/journal.pone.0171206
16. Oddy WH, Robinson M, Ambrosini GL, et al. The association between dietary patterns and mental health in early adolescence. *Preventive Medicine* 2009;49(1):39-44. doi: <https://doi.org/10.1016/j.ypped.2009.05.009>

17. Lien L. Is breakfast consumption related to mental distress and academic performance in adolescents?

1  
2 *Public Health Nutrition* 2007;10(4):422-28. doi: 10.1017/S1368980007258550 [published Online First:  
3  
4 04/01]

5  
6 18. Ussher MH, Owen CG, Cook DG, et al. The relationship between physical activity, sedentary behaviour  
7  
8 and psychological wellbeing among adolescents. *Social Psychiatry and Psychiatric Epidemiology*  
9  
10 2007;42(10):851-56. doi: 10.1007/s00127-007-0232-x

11  
12 19. Fuligni AJ, Hardway C. Daily Variation in Adolescents' Sleep, Activities, and Psychological Well-Being.  
13  
14 *Journal of Research on Adolescence* 2006;16(3):353-78. doi: 10.1111/j.1532-7795.2006.00498.x

15  
16 20. Przybylski AK, Weinstein N. A Large-Scale Test of the Goldilocks Hypothesis: Quantifying the Relations  
17  
18 Between Digital-Screen Use and the Mental Well-Being of Adolescents. *Psychological Science*  
19  
20 2017;28(2):204-15. doi: 10.1177/0956797616678438

21  
22 21. Hamer M, Yates T, Sherar LB, et al. Association of after school sedentary behaviour in adolescence with  
23  
24 mental wellbeing in adulthood. *Preventive Medicine* 2016;87(Supplement C):6-10. doi:  
25  
26 <https://doi.org/10.1016/j.ypmed.2016.02.021>

27  
28 22. Trainor S, Delfabbro P, Anderson S, et al. Leisure activities and adolescent psychological well-being.  
29  
30 *Journal of Adolescence* 2010;33(1):173-86. doi: <https://doi.org/10.1016/j.adolescence.2009.03.013>

31  
32 23. Rose T, Joe S, Williams A, et al. Measuring Mental Wellbeing Among Adolescents: A Systematic Review  
33  
34 of Instruments. *Journal of Child and Family Studies* 2017;26(9):2349-62. doi: 10.1007/s10826-017-  
35  
36 0754-0

37  
38 24. Pollard EL, Lee PD. Child Well-being: A Systematic Review of the Literature. *Social Indicators Research*  
39  
40 2003;61(1):59-78. doi: 10.1023/a:1021284215801

41  
42 25. Patalay P, Fitzsimons E. Correlates of Mental Illness and Wellbeing in Children: Are They the Same?  
43  
44 Results From the UK Millennium Cohort Study. *Journal of the American Academy of Child &*  
45  
46 *Adolescent Psychiatry* 2016;55(9):771-83. doi: 10.1016/j.jaac.2016.05.019

47  
48 26. Proctor CL, Linley PA, Maltby J. Youth Life Satisfaction: A Review of the Literature. *Journal of*  
49  
50 *Happiness Studies* 2009;10(5):583-630. doi: 10.1007/s10902-008-9110-9

27. Candace Currie, Cara Zanotti, Antony Morgan, et al. Social determinants of health and well-being among young people. International report from the 2009/2010 survey. Health Behavior in school-age children (HBSC) study. Denmark: WHO Regional Office for Europe, 2012:252.
28. HSCIC. What About YOUth? Survey. In: Service UD, ed. Data Collection. 2nd ed. England: HEALTH AND SOCIAL CARE INFORMATION CENTRE, 2014.
29. Tennant R, Hiller L, Fishwick R, et al. The Warwick-Edinburgh Mental Well-being Scale (WEMWBS): development and UK validation. *Health and Quality of Life Outcomes* 2007;5:63-63. doi: 10.1186/1477-7525-5-63
30. Taggart F, Stewart-Brown S, Parkinson J. Warwick-Edinburgh Mental Well-being Scale (WEMWBS) Scotland: NHS Health Scotland; 2015 [Available from: <http://www.healthscotland.com/uploads/documents/26787-WEMWBS%20User%20Guide%20Version%202%20May%202015.pdf> accessed 19th October 2017.
31. Morgan K, Hallingberg B, Littlecott H, et al. Predictors of physical activity and sedentary behaviours among 11-16 year olds: Multilevel analysis of the 2013 Health Behaviour in School-aged Children (HBSC) study in Wales. *BMC Public Health* 2016;16:569. doi: 10.1186/s12889-016-3213-8
32. Booth ML, Okely AD, Chey T, et al. The reliability and validity of the physical activity questions in the WHO health behaviour in schoolchildren (HBSC) survey: a population study. *British journal of sports medicine* 2001;35(4):263-7. [published Online First: 2001/07/31]
33. Olweus D. The Revised Olweus Bully/Victim Questionnaire. University of Bergen: Research Center for Health Promotion (HEMIL Center) 1996.
34. Cook CR, Williams KR, Guerra NG, et al. Predictors of bullying and victimization in childhood and adolescence: A meta-analytic investigation. *School Psychology Quarterly* 2010;25(2):65-83. doi: 10.1037/a0020149
35. Przybylski AK, Bowes L. Cyberbullying and adolescent well-being in England: a population-based cross-sectional study. *The Lancet Child & Adolescent Health* 2017;1(1):19-26. doi: 10.1016/S2352-4642(17)30011-1

36. Department for Communities and Local Government. The English indices of deprivation London2015

[Available from:

[https://www.gov.uk/government/uploads/system/uploads/attachment\\_data/file/465791/English\\_Indices\\_of\\_Deprivation\\_2015\\_-\\_Statistical\\_Release.pdf](https://www.gov.uk/government/uploads/system/uploads/attachment_data/file/465791/English_Indices_of_Deprivation_2015_-_Statistical_Release.pdf)

37. Office of National Statistics. Measuring National Well-being: Insights into children's mental health and well-being. England, 2015.

38. Office of National Statistics. Young people's well-being England: Office for National Statistics; 2017

[Available from:

<https://www.ons.gov.uk/peoplepopulationandcommunity/wellbeing/articles/youngpeopleswellbeingandpersonalfinance/2017> accessed 10th November 2017.

39. Fuller E, Morris S. Health Survey for England. London NHS Digital, 2015.

40. National Centre for Social Research. Smoking, Drinking and Drug Use among Young People. In: National Foundation for Educational Research, ed.: UK Data Service, 2012.

41. Brooks F, Magnusson J, Klemra E, et al. Health Behaviours of School-Aged Children (HBSC) 2013-2014 England2014 [Available from: [www.hbscengland.com](http://www.hbscengland.com).

42. Booker CL, Skew AJ, Sacker A, et al. Well-Being in Adolescence—An Association With Health-Related Behaviors: Findings From Understanding Society, the UK Household Longitudinal Study. *The Journal of Early Adolescence* 2014;34(4):518-38. doi: 10.1177/0272431613501082

43. Booker CL, Skew AJ, Kelly YJ, et al. Media Use, Sports Participation, and Well-Being in Adolescence: Cross-Sectional Findings From the UK Household Longitudinal Study. *American Journal of Public Health* 2015;105(1):173-79. doi: 10.2105/AJPH.2013.301783

Table A1. Descriptive statistics for well-being scores and explanatory variables under study, by gender

|                                             | <b>Total</b>   | <b>Boys</b>   |                      | <b>Girls</b>  |                      |                |
|---------------------------------------------|----------------|---------------|----------------------|---------------|----------------------|----------------|
|                                             | <b>N</b>       | <b>N</b>      | <b>Mean (SD) / %</b> | <b>N</b>      | <b>Mean (SD) / %</b> | <b>P value</b> |
|                                             | <b>120,115</b> | <b>57,153</b> | <b>47.58%</b>        | <b>62,962</b> | <b>52.42%</b>        |                |
| <b>WEMWBS Scores</b> <sup>1</sup>           | 117,842        | 56,352        | 47.82%               | 61,490        | 52.18%               | <0.0001        |
| Mean (SD)                                   |                |               | 50 (8.60)            |               | 45 (9.66)            |                |
| <b>Substance use</b> <sup>2</sup>           | 71,133         | 32,516        | 45.71%               | 38617         | 54.29%               | <0.0001        |
| None                                        |                | 17,133        | 52.69                | 19932         | 51.61                |                |
| One                                         |                | 10,783        | 33.16                | 12150         | 31.46                |                |
| Two                                         |                | 3,010         | 9.26                 | 3,785         | 9.8                  |                |
| Three                                       |                | 1,590         | 4.89                 | 2,750         | 7.12                 |                |
| <b>Unhealthy Eating Habits</b> <sup>3</sup> | 115918         | 55,289        | 47.70%               | 60,629        | 52.30%               | <0.0001        |
| None                                        |                | 12,081        | 21.85                | 11,951        | 19.71                |                |
| One                                         |                | 20,287        | 36.69                | 20,389        | 33.63                |                |
| Two                                         |                | 16,373        | 29.61                | 19,064        | 31.44                |                |
| Three                                       |                | 6,548         | 11.84                | 9,225         | 15.22                |                |
| <b>Sleeping hours (&gt;8 hrs)</b>           | 117,516        | 56,207        | 47.83%               | 61307         | 52.17%               | <0.0001        |
| Not in the past 7 days                      |                | 3676          | 6.54                 | 6922          | 11.29                |                |
| some days                                   |                | 11051         | 19.66                | 16051         | 26.18                |                |
| most days                                   |                | 20,121        | 35.8                 | 20928         | 34.14                |                |
| everyday                                    |                | 21,361        | 38                   | 17406         | 28.39                |                |
| <b>Bullying</b>                             | 117,744        | 56,309        | 47.82%               | 61,435        | 52.18%               | <0.0001        |
| No                                          |                | 45,959        | 81.62                | 45,094        | 73.40                |                |
| yes                                         |                | 10,350        | 18.38                | 16,341        | 26.60                |                |
| <b>Physical activity</b>                    | 118450         | 56,674        | 47.85                | 61776         | 52.15                | <0.0001        |
| Physically active                           |                | 48,172        | 85                   | 44,348        | 71.79                |                |
| Inactive                                    |                | 8,502         | 15                   | 17,428        | 28.21                |                |
| <b>Screen time</b>                          | 118,845        | 56,892        | 47.87                | 61,943        | 52.13%               | <0.0001        |
| About 2 hrs/day                             |                | 3,609         | 6.34                 | 3,469         | 5.6                  |                |
| ≤1hrs/day                                   |                | 912           | 1.6                  | 929           | 1.5                  |                |
| About 3 -4 hours/day                        |                | 18,621        | 32.73                | 17,311        | 27.95                |                |
| About 5-6 hours/day                         |                | 17,198        | 30.23                | 17,850        | 28.82                |                |
| ≥7hrs/day                                   |                | 16,559        | 29.1                 | 22387         | 36.14                |                |
| <b>Reading</b>                              | 118,140        | 56,513        | 47.84                | 61,627        | 52.16                | <0.0001        |
| None                                        |                | 14,278        | 25.26                | 9,875         | 16.02                |                |
| About Half an hour/day                      |                | 17,572        | 31.09                | 15,363        | 24.93                |                |
| About 1 hr/day                              |                | 12,505        | 22.13                | 13,442        | 21.81                |                |
| ≥2hrs/day                                   |                | 12,158        | 21.51                | 22,947        | 37.24                |                |

<sup>1</sup>WEMWBS : Warwick-Edinburgh Mental Wellbeing score<sup>2</sup> Risk behaviours include smoking, drinking and cannabis use<sup>3</sup> Unhealthy eating habits include skipping breakfast, not having 5 portions of fruits and vegetables and consumption of takeaway food.

Confidential: For Review Only

1  
2  
3  
4  
5  
6  
7  
8  
9  
10  
11  
12  
13  
14  
15  
16  
17  
18  
19  
20  
21  
22  
23  
24  
25  
26  
27  
28  
29  
30  
31  
32  
33  
34  
35  
36  
37  
38  
39  
40  
41  
42  
43  
44  
45  
46  
47  
48  
49  
50  
51  
52  
53  
54  
55  
56  
57  
58  
59  
60

Table A2: Univariate analysis between well-being and explanatory variables, by gender

|                                   | MODEL <sup>1</sup> |               |           |               |
|-----------------------------------|--------------------|---------------|-----------|---------------|
|                                   | Boys               |               | Girls     |               |
|                                   | <i>B</i>           | 95 % CI       | <i>B</i>  | 95 % CI       |
| <b>Substance Use</b>              |                    |               |           |               |
| None                              | Reference          |               | Reference |               |
| One                               | -0.34*             | [-0.56,-0.13] | -1.48**   | [-1.70,-1.27] |
| Two                               | -2.19**            | [-2.60,-1.78] | -4.96**   | [-5.35,-4.57] |
| Three                             | -3.56**            | [-4.16,-2.95] | -5.89**   | [-6.47,-5.30] |
| <b>Unhealthy Eating Habits</b>    |                    |               |           |               |
| None                              | Reference          |               | Reference |               |
| One                               | -1.65**            | [-1.88,-1.43] | -2.63**   | [-2.91,-2.34] |
| Two                               | -3.36**            | [-3.60,-3.12] | -4.85**   | [-5.13,-4.58] |
| Three                             | -5.00**            | [-5.39,-4.61] | -6.49**   | [-6.83,-6.14] |
| <b>Sleeping hours (&gt;8 hrs)</b> |                    |               |           |               |
| Not in the past 7 days            | Reference          |               | Reference |               |
| some days                         | 2.99**             | [2.51,3.47]   | 4.71**    | [4.39,5.04]   |
| most days                         | 5.59**             | [5.15,6.03]   | 8.39**    | [8.06,8.72]   |
| everyday                          | 7.49**             | [7.07,7.87]   | 10.70**   | [10.35,11.06] |
| <b>Bullying</b>                   |                    |               |           |               |
| No                                | Reference          |               | Reference |               |
| Yes                               | -4.70**            | [-3.59,-3.31] | -5.84**   | [-5.25,-4.90] |
| <b>Physical activity</b>          |                    |               |           |               |
| Physically active                 | Reference          |               | Reference |               |
| Inactive                          | -3.85**            | [-4.11,-3.61] | -2.77**   | [-3.04,-2.51] |
| <b>Screen time</b>                |                    |               |           |               |
| About 2 hrs/day                   | Reference          |               | Reference |               |
| ≤1hrs/day                         | 0.07               | [-0.59, 0.73] | 0.08      | [-0.69, 0.85] |
| About 3 -4 hours/day              | -1.22**            | [-1.60,-0.84] | -1.27**   | [-1.71,-0.83] |
| About 5-6 hours/day               | -2.17**            | [-2.51,-1.83] | -3.06**   | [-3.52,-2.60] |
| ≥= 7 hours / day                  | -3.72**            | [-4.12,-3.32] | -5.38**   | [-5.80,-4.97] |
| <b>Reading</b>                    |                    |               |           |               |
| None                              | Reference          |               | Reference |               |
| About Half an hour/day            | 1.61**             | [1.41,1.82]   | 2.17**    | [1.88,2.46]   |
| About 1 hr/day                    | 2.25**             | [2.06,2.44]   | 2.54**    | [2.26,2.82]   |
| ≥2hrs/day                         | 2.27***            | [2.01,2.52]   | 2.35**    | [2.05,2.66]   |
| <b>IMD Scores</b>                 |                    |               |           |               |
| High deprivation                  | Reference          |               | Reference |               |

|                     |           |               |           |               |
|---------------------|-----------|---------------|-----------|---------------|
| Average deprivation | 0.57**    | [0.31,0.81]   | 0.35**    | [0.10,0.59]   |
| Least deprivation   | 1.05**    | [0.87,1.21]   | 1.16**    | [0.92,1.40]   |
| <b>Ethnicity</b>    |           |               |           |               |
| White               | Reference |               | Reference |               |
| Mixed               | 0.18      | [-0.29,0.65]  | -0.44*    | [-0.82,-0.06] |
| Asian               | -0.54*    | [-0.85,-0.23] | 0.98**    | [0.59,1.38]   |
| Black               | 0.91**    | [0.42,1.39]   | 1.10**    | [0.67,1.52]   |
| Other               | -0.45*    | [-0.84,-0.04] | 0.30      | [-0.09,0.70]  |

<sup>1</sup>Unadjusted model taking into account clustering at Local Authority Level, Multilevel models fitted with weighted design weights, Quadratic function added to reading.

\*\* p<0.001, \* p<0.05

Confidential: For Review Only



Table A3: Gender - stratified partially-adjusted and fully-adjusted multilevel modelling for well-being and explanatory variables

| Variables                         | Boys               |               | MODEL <sup>3</sup> |               | Girls              |               | MODEL <sup>3</sup> |               |
|-----------------------------------|--------------------|---------------|--------------------|---------------|--------------------|---------------|--------------------|---------------|
|                                   | MODEL <sup>2</sup> |               | MODEL <sup>3</sup> |               | MODEL <sup>2</sup> |               | MODEL <sup>3</sup> |               |
|                                   | B                  | 95 % CI       | B                  | 95 % CI       | B                  | 95 % CI       | B                  | 95 % CI       |
| <b>Substance use</b>              |                    |               |                    |               |                    |               |                    |               |
| None                              | Reference          |               | Reference          |               | Reference          |               | Reference          |               |
| One                               | -0.40**            | [-0.61,-0.18] | -0.14              | [-0.36,0.08]  | -1.51**            | [-1.73,-1.30] | -0.77**            | [-0.97,-0.57] |
| Two                               | -2.16**            | [-2.57,-1.75] | -1.05**            | [-1.42,-0.67] | -4.84**            | [-5.22,-4.46] | -2.67**            | [-3.01,-2.33] |
| Three                             | -3.50**            | [-4.11,-2.88] | -1.63**            | [-2.16,-1.09] | -5.80**            | [-6.36,-5.23] | -2.79**            | [-3.35,-2.24] |
| <b>Eating Habits</b>              |                    |               |                    |               |                    |               |                    |               |
| None                              | Reference          |               | Reference          |               | Reference          |               | Reference          |               |
| One                               | -1.63**            | [-1.85,-1.41] | -0.89**            | [-1.18,-0.60] | -2.63**            | [-2.92,-2.34] | -1.37**            | [-1.69,-1.06] |
| Two                               | -3.31**            | [-3.55,-3.08] | -1.84**            | [-2.14,-1.54] | -4.84**            | [-5.12,-4.55] | -2.29**            | [-2.64,-1.96] |
| Three                             | -4.95**            | [-5.34,-4.56] | -2.44**            | [-2.82,-2.06] | -6.46**            | [-6.79,-6.10] | -2.61**            | [-3.04,-2.18] |
| <b>Sleeping hours (&gt;8 hrs)</b> |                    |               |                    |               |                    |               |                    |               |
| Not in the past 7 days            | Reference          |               | Reference          |               | Reference          |               | Reference          |               |
| some days                         | 2.98**             | [2.50,3.45]   | 2.69**             | [2.10,3.28]   | 4.69**             | [4.36,5.01]   | 3.71**             | [3.34,4.08]   |
| most days                         | 5.55**             | [5.11,5.99]   | 4.30**             | [3.78,4.82]   | 8.35**             | [8.01,8.69]   | 6.64**             | [6.28,7.00]   |
| everyday                          | 7.45**             | [7.03,7.86]   | 5.79**             | [5.29,6.28]   | 10.65**            | [10.29,11.01] | 8.16**             | [7.72,8.60]   |
| <b>Bullying</b>                   |                    |               |                    |               |                    |               |                    |               |
| No                                | Reference          |               | Reference          |               | Reference          |               | Reference          |               |
| Yes                               | -4.64**            | [-4.86,-4.42] | -3.78**            | [-4.09,-3.48] | -5.77**            | [-5.98,-5.56] | -4.01**            | [-4.23,-3.78] |
| <b>Physical activity</b>          |                    |               |                    |               |                    |               |                    |               |
| Physically active                 | Reference          |               | Reference          |               | Reference          |               | Reference          |               |
| Inactive                          | -3.78**            | [-4.02,-3.55] | -2.63**            | [-2.95,-2.30] | -2.77**            | [-3.04,-2.50] | -1.70**            | [-2.01,-1.39] |
| <b>Screen time</b>                |                    |               |                    |               |                    |               |                    |               |
| About 2 hrs/day                   | Reference          |               | Reference          |               | Reference          |               | Reference          |               |
| ≤1hrs/day                         | 0.09               | [-0.57,0.75]  | 0.34               | [-0.58,1.26]  | 0.09               | [-0.69,0.87]  | -0.38              | [-1.49,0.72]  |
| About 3 -4 hours/day              | -1.22**            | [-1.60,-0.83] | -0.61*             | [-0.99,-0.23] | -1.26**            | [-1.70,-0.83] | -0.54              | [-1.14,0.05]  |

|    |                                       |           |               |           |               |           |               |           |               |
|----|---------------------------------------|-----------|---------------|-----------|---------------|-----------|---------------|-----------|---------------|
| 1  |                                       |           |               |           |               |           |               |           |               |
| 2  | About 5-6 hours/day                   | -2.15**   | [-2.50,-1.81] | -0.82**   | [-1.27,-0.37] | -3.04**   | [-3.49,-2.58] | -1.21**   | [-1.75,-0.67] |
| 3  | >= 7 hours / day                      | -3.67**   | [-4.06,-3.27] | -1.20**   | [-1.65,-0.75] | -5.32**   | [-5.73,-4.90] | -1.81**   | [-2.29,-1.33] |
| 4  |                                       |           |               |           |               |           |               |           |               |
| 5  | <b>Reading</b>                        |           |               |           |               |           |               |           |               |
| 6  | None                                  | Reference |               | Reference |               | Reference |               | Reference |               |
| 7  | About Half an hour/day                | 1.59**    | [1.38,1.80]   | 0.57**    | [0.26,0.88]   | 2.13**    | [1.84,2.42]   | 0.56**    | [0.23,0.90]   |
| 8  | About 1 hr/day                        | 2.24**    | [2.04,2.43]   | 1.04**    | [0.79,1.29]   | 2.51**    | [2.24,2.78]   | 0.60**    | [0.26,0.93]   |
| 9  | ≥2hrs/day                             | 2.28**    | [2.05,2.54]   | 0.90**    | [0.55,1.25]   | 2.34**    | [2.03,2.64]   | 0.33*     | [0.02,0.64]   |
| 10 |                                       |           |               |           |               |           |               |           |               |
| 11 | <b>IMD Scores</b>                     |           |               |           |               |           |               |           |               |
| 12 | High deprivation                      | --        | --            | Reference |               | --        | --            | Reference |               |
| 13 | Average deprivation                   | --        | --            | -0.12     | [-0.38,0.14]  | --        | --            | 0.16      | [-0.16,0.49]  |
| 14 | Least deprivation                     | --        | --            | 0.17      | [-0.06,0.40]  | --        | --            | 0.36*     | [0.06,0.66]   |
| 15 |                                       |           |               |           |               |           |               |           |               |
| 16 | <b>Ethnicity</b>                      |           |               |           |               |           |               |           |               |
| 17 | White                                 | --        | --            | Reference |               | --        | --            | Reference |               |
| 18 | Mixed                                 | --        | --            | -0.06     | [0.81,-0.59]  | --        | --            | 0.44      | [-0.08,0.96]  |
| 19 | Asian                                 | --        | --            | -0.09     | [0.81,-0.84]  | --        | --            | 0.35      | [-0.53,1.23]  |
| 20 | Black                                 | --        | --            | 0.99*     | [0.01,0.25]   | --        | --            | 1.75**    | [1.20,2.31]   |
| 21 | Other                                 | --        | --            | -0.59*    | [0.02,-1.09]  | --        | --            | -0.19     | [-0.88,0.49]  |
| 22 |                                       |           |               |           |               |           |               |           |               |
| 23 | <b>Mode of questionnaire delivery</b> |           |               |           |               |           |               |           |               |
| 24 | Online                                | --        | --            |           |               | --        | --            |           |               |
| 25 | paper                                 | --        | --            | 0.24      | [-0.03,0.51]  | --        | --            | 1.26**    | [0.99,1.53]   |
| 26 |                                       |           |               |           |               |           |               |           |               |
| 27 |                                       |           |               |           |               |           |               |           |               |
| 28 |                                       |           |               |           |               |           |               |           |               |
| 29 |                                       |           |               |           |               |           |               |           |               |
| 30 |                                       |           |               |           |               |           |               |           |               |

<sup>2</sup> Each predictor variable adjusted for ethnicity, mode of questionnaire delivery and Index of multiple deprivation

<sup>3</sup> All Variables mutually adjusted for each other

Note: Multilevel models fitted with weighted design weights, Quadratic function added to reading

\*\* p<0.001, \* p<0.05

Relationship between wellbeing and health behaviours: (A) Risk Factors (B) Protective Factors

**A**

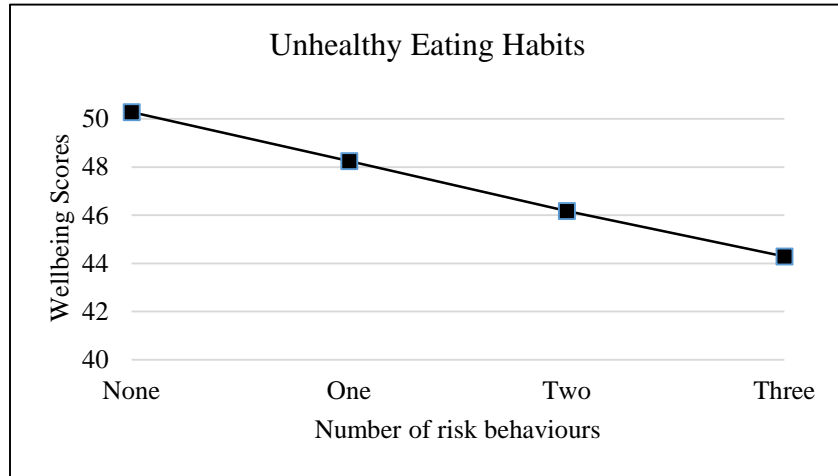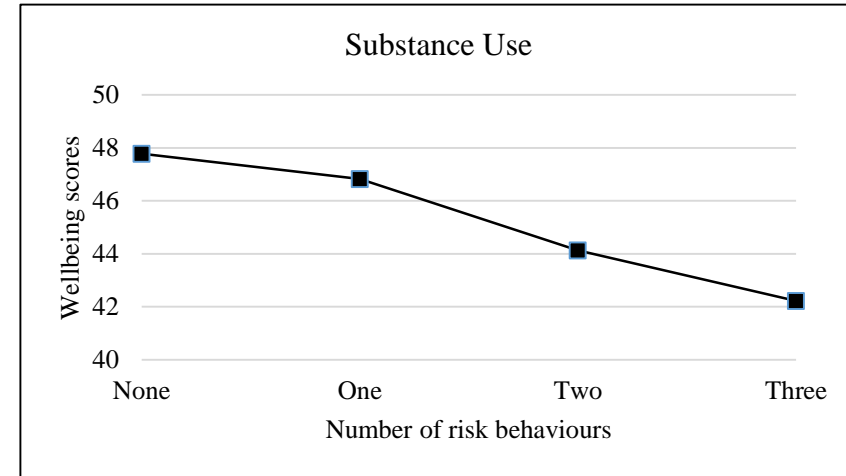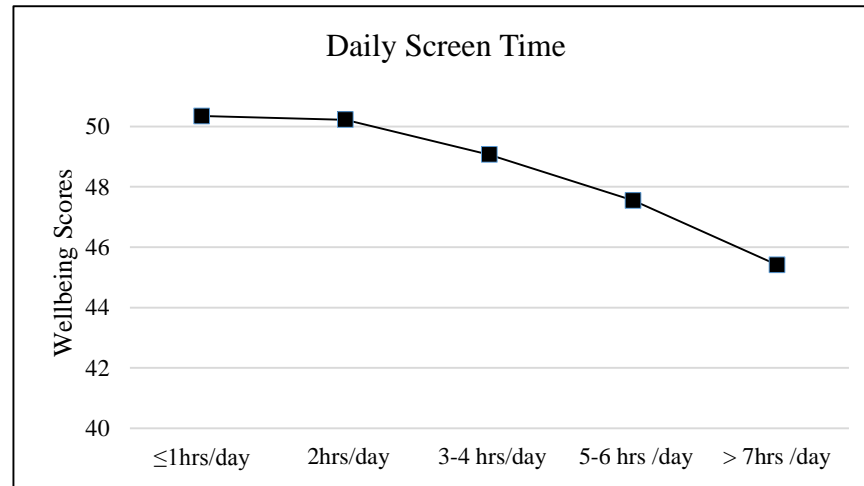

**B**

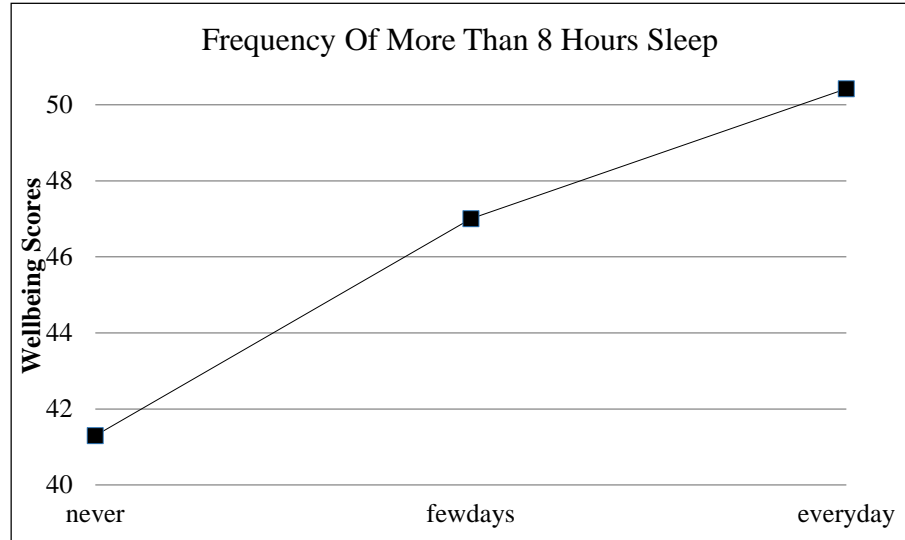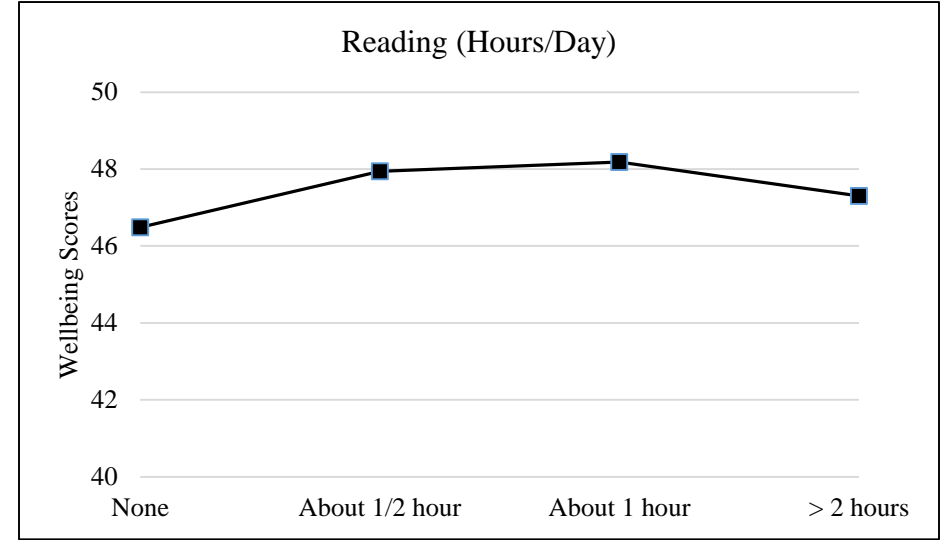

1  
2  
3  
4  
5  
6  
7  
8  
9  
10  
11  
12  
13  
14  
15  
16  
17  
18  
19  
20  
21  
22  
23  
24  
25  
26  
27  
28  
29  
30  
31  
32  
33  
34  
35  
36  
37  
38  
39  
40  
41

## APPENDIX A

## VARIABLE DESCRIPTION

| Composite variables                      | Original variables                                                                                                                                                                                                                                                                                                               | Variable labels               | Composite variables                                                                                                                                                                                                                                                                                                                                                                                                                                                                                                                                                                                                                                                                                                                                                                                                                                                                                                                                                    |
|------------------------------------------|----------------------------------------------------------------------------------------------------------------------------------------------------------------------------------------------------------------------------------------------------------------------------------------------------------------------------------|-------------------------------|------------------------------------------------------------------------------------------------------------------------------------------------------------------------------------------------------------------------------------------------------------------------------------------------------------------------------------------------------------------------------------------------------------------------------------------------------------------------------------------------------------------------------------------------------------------------------------------------------------------------------------------------------------------------------------------------------------------------------------------------------------------------------------------------------------------------------------------------------------------------------------------------------------------------------------------------------------------------|
| <b>Substance use risk</b> <sup>1-6</sup> | <b>Definitions were:</b><br>Smoking: Cigarette smoking status (currently smoke)<br>Drinking: Alcohol drinking status (Usually have an alcoholic drink once a month or more frequently)<br>Cannabis: Cannabis use status (Ever tried cannabis)                                                                                    | SmkSt2<br>alcfrq1<br>Cantry   | <b>Alcohol + smoking + cannabis</b><br>(1) Smoking risk: If currently smokes (2) Drinking risk: If drinks once a month or more frequently (3) Cannabis risk: If ever tried cannabis. Each item was coded 0 for “no” and 1 for “yes”. The composite score obtained ranged from zero to three based on the number of risk behaviours; (0= None, 1= Only one, 2 =Any two and 3 =All three                                                                                                                                                                                                                                                                                                                                                                                                                                                                                                                                                                                 |
| <b>Physical Activity</b> <sup>7</sup>    | <b>Physical activity: in line with general recommendations</b><br>How many days physically active for 60+ minutes, in last 7 days ( Active for more than 5 days )<br><br>How often usually exercise in free time (Active for more than twice a week)<br><br>How many hours usually exercise in free (Active for an hour or more) | Physact<br>ExerOft<br>ExerHrs | <b>Duration of exercise + Frequency of exercise + Number of days met recommended guidelines</b><br>The first question on moderate to vigorous physical activity was “Over the past 7 days, on how many days you were physically active for a total of at least 60 minutes per day and responses ranged from 0 to 7. Second, the participants were asked “Outside school hours: how often do you usually exercise in your free time so much that you get out of breath or sweat?” with responses from less than a once a month to every day. The question on duration was “Outside school hours: how many hours do you usually exercise in your free time so much that you get out of breath or sweat?”, with responses from none to 7 or more hours. Adolescents who exercised for more than twice a week for an hour or more or were physically active for 60+ minutes for at least 5 days were classified as “physically active” and the rest “physically inactive”. |
| <b>Sleeping habits</b> <sup>8,9</sup>    | <b>Sleeping frequency in last week</b><br>How often slept 8+ hours per night in last 7 days                                                                                                                                                                                                                                      | Sleep8pn                      | The question was “Over the past 7 days, how often did you sleep for 8 hours or more” and the responses were “every day”, “most days”, “some days” and “not in the past 7 days”.                                                                                                                                                                                                                                                                                                                                                                                                                                                                                                                                                                                                                                                                                                                                                                                        |

**Eating Habits** <sup>10-12</sup>**Definition of each unhealthy eating habits were:**

|                                                                                                              |          |
|--------------------------------------------------------------------------------------------------------------|----------|
| How often eaten take-away food in last 7 days (unhealthy habit if taken takeaway in past seven days)         | Eattake  |
| How often eaten breakfast in last 7 days (unhealthy habit if breakfast not taken regularly)                  | Eatbfst  |
| Consumed more than five portions of fruit and veg yesterday (unhealthy habit if 5-A-DAY not taken regularly) | FV5ormor |

**Breakfast consumption + take away food + 5 A day**

(1) Skipping Breakfast: If avoided breakfast in last 7 days (2) Poor diet: If consumed less than 5 portions of fruits and vegetables a day (3) Takeaway food: If consumed takeaway food in past 7 days. Each item was coded 0 for “no” and 1 for “yes”. According to the number of unhealthy eating habits participant’s exhibited, a risk score from zero to three (0= None, 1= Only one, 2 =Any two and 3 =All three) was given

**Screen time** <sup>13-16</sup>**Definitions of screen time derived as follows (Weekend and weekday hours combined)**

|                                                                 |                     |
|-----------------------------------------------------------------|---------------------|
| Hours per day watching TV                                       | Watchwk,<br>Watchwe |
| Hours per day spent playing computer games                      | Compwk,<br>Compwe   |
| Hours per day spent on computers for communicating, or homework | Comphwk,<br>Comphwe |
| Hours per day spent on smart phone                              | Smartwk,<br>Smartwe |

**TV +\_computer games + internet**

FOR ALL, Response options for each item were ‘none at all’, ‘about half an hour a day’, ‘about 1 hour a day’, ‘about 2 hours a day’, ‘about 3 hours a day’, ‘about 4 hours a day’, ‘about 5 hours a day’, ‘about 6 hours a day’ and ‘about 7 or more hours a day’. The total screen time was calculated by grouping the similar options of each item and by combining both weekends and weekdays. Subjects were then categorised into “ $\geq 7$ hrs/day”, “About 5-6 hours/day”, “About 3 -4 hours/day”, “About 2 hrs/day” and “ $\leq 1$ hrs/day”.

**Reading** <sup>17</sup>**Definitions of reading derived as follows:**

|                                                  |                   |
|--------------------------------------------------|-------------------|
| Hours per day spent reading outside school hours | Readwk,<br>Readwe |
|--------------------------------------------------|-------------------|

**Reading hours (Weekend + weekdays)**

“About how many hours a day do you usually spend sitting down reading books, magazines or newspapers (including e-readers, online newspapers, and magazines) and studying when you are not at school?”. The questions were asked for weekends and weekdays separately. The response options ranged from none to  $\geq 7$  hours per day

**Bullying** <sup>18 19</sup>**Frequency with which the behaviour occurred over the past couple of months:****Traditional bullying (physical+ verbal + relational)**

|    |                                                         |         |  |
|----|---------------------------------------------------------|---------|--|
| 1  |                                                         |         |  |
| 2  |                                                         |         |  |
| 3  | I was called mean names, was made fun of, or teased in  | Bllynam |  |
| 4  | a hurtful way                                           |         |  |
| 5  |                                                         |         |  |
| 6  | Other people left me out of things on purpose, excluded | Bllyout |  |
| 7  | me from their group of friends, or completely ignored   |         |  |
| 8  | me                                                      |         |  |
| 9  | I was hit, kicked, pushed, shoved around, or locked     | Bllyhit |  |
| 10 | indoors"                                                |         |  |
| 11 | Other people lied or spread rumours                     | Bllylie |  |
| 12 |                                                         |         |  |
| 13 | Made fun of me because of weight                        | Bllyfun |  |
| 14 |                                                         |         |  |
| 15 | Sexual jokes/comments                                   | Bllysex |  |
| 16 |                                                         |         |  |
| 17 |                                                         |         |  |
| 18 |                                                         |         |  |
| 19 |                                                         |         |  |
| 20 |                                                         |         |  |
| 21 |                                                         |         |  |
| 22 |                                                         |         |  |
| 23 |                                                         |         |  |
| 24 |                                                         |         |  |
| 25 |                                                         |         |  |
| 26 |                                                         |         |  |
| 27 |                                                         |         |  |
| 28 |                                                         |         |  |
| 29 |                                                         |         |  |
| 30 |                                                         |         |  |
| 31 |                                                         |         |  |
| 32 |                                                         |         |  |
| 33 |                                                         |         |  |
| 34 |                                                         |         |  |
| 35 |                                                         |         |  |
| 36 |                                                         |         |  |
| 37 |                                                         |         |  |
| 38 |                                                         |         |  |
| 39 |                                                         |         |  |
| 40 |                                                         |         |  |
| 41 |                                                         |         |  |
| 42 |                                                         |         |  |
| 43 |                                                         |         |  |
| 44 |                                                         |         |  |
| 45 |                                                         |         |  |
| 46 |                                                         |         |  |

Bullying measure was meant to assess the extent to which they had recently experienced other children directing different types of bullying towards themselves. Six statements reflecting traditional bullying (physical, verbal, and relational) were asked. Questions were rated by participants using a 5-point response scale that ranged from 0="I haven't been bullied this way in the past couple of months" 1="It has happened once or twice", 2="2 or 3 times a month", 3="2 or 3 times a week", to 4="Several times a week."

1. Farmer S, Hanratty B. The relationship between subjective wellbeing, low income and substance use among schoolchildren in the north west of England: a cross-sectional study. *Journal of Public Health* 2012;34(4):512-22. doi: 10.1093/pubmed/fds022
2. Phillips-Howard PA, Bellis MA, Briant LB, et al. Wellbeing, alcohol use and sexual activity in young teenagers: findings from a cross-sectional survey in school children in North West England. *Substance abuse treatment, prevention, and policy* 2010;5:27. doi: 10.1186/1747-597x-5-27 [published Online First: 2010/11/12]
3. Newcomb MD, Bentler PM, Collins C. Alcohol Use and Dissatisfaction with Self and Life: A Longitudinal Analysis of Young Adults. *Journal of Drug Issues* 1986;16(4):479-94. doi: 10.1177/002204268601600401
4. Bergman MM, Scott J. Young adolescents' wellbeing and health-risk behaviours: gender and socio-economic differences. *Journal of Adolescence* 2001;24(2):183-97. doi: <https://doi.org/10.1006/jado.2001.0378>
5. Taylor G, McNeill A, Girling A, et al. Change in mental health after smoking cessation: systematic review and meta-analysis. *BMJ : British Medical Journal* 2014;348 doi: 10.1136/bmj.g1151
6. Booker CL, Skew AJ, Sacker A, et al. Well-Being in Adolescence—An Association With Health-Related Behaviors: Findings From Understanding Society, the UK Household Longitudinal Study. *The Journal of Early Adolescence* 2014;34(4):518-38. doi: 10.1177/0272431613501082
7. Ussher MH, Owen CG, Cook DG, et al. The relationship between physical activity, sedentary behaviour and psychological wellbeing among adolescents. *Social Psychiatry and Psychiatric Epidemiology* 2007;42(10):851-56. doi: 10.1007/s00127-007-0232-x
8. Fuligni AJ, Hardway C. Daily Variation in Adolescents' Sleep, Activities, and Psychological Well-Being. *Journal of Research on Adolescence* 2006;16(3):353-78. doi: 10.1111/j.1532-7795.2006.00498.x
9. James S, Hale L. Sleep Duration and Child Wellbeing: A Nonlinear Association. *Journal of clinical child and adolescent psychology : the official journal for the Society of Clinical Child and Adolescent Psychology, American Psychological Association, Division 53* 2017;46(2):258-68. doi: 10.1080/15374416.2016.1204920
10. Rooney C, McKinley MC, Woodside JV. The potential role of fruit and vegetables in aspects of psychological well-being: a review of the literature and future directions. *Proceedings of the Nutrition Society* 2013;72(4):420-32. doi: 10.1017/S0029665113003388 [published Online First: 09/11]
11. Conner TS, Brookie KL, Carr AC, et al. Let them eat fruit! The effect of fruit and vegetable consumption on psychological well-being in young adults: A randomized controlled trial. *PLoS ONE* 2017;12(2):e0171206. doi: 10.1371/journal.pone.0171206
12. Lien L. Is breakfast consumption related to mental distress and academic performance in adolescents? *Public Health Nutrition* 2007;10(4):422-28. doi: 10.1017/S1368980007258550 [published Online First: 04/01]
13. Hoare E, Milton K, Foster C, et al. The associations between sedentary behaviour and mental health among adolescents: a systematic review. *International Journal of Behavioral Nutrition and Physical Activity* 2016;13(1):108. doi: 10.1186/s12966-016-0432-4
14. Przybylski AK, Weinstein N. A Large-Scale Test of the Goldilocks Hypothesis: Quantifying the Relations Between Digital-Screen Use and the Mental Well-Being of Adolescents. *Psychological Science* 2017;28(2):204-15. doi: 10.1177/0956797616678438



- 1
- 2
- 3
- 4 15. Hamer M, Yates T, Sherar LB, et al. Association of after school sedentary behaviour in adolescence with mental wellbeing in adulthood. *Preventive*
- 5 *Medicine* 2016;87(Supplement C):6-10. doi: <https://doi.org/10.1016/j.ypped.2016.02.021>
- 6 16. Booker CL, Skew AJ, Kelly YJ, et al. Media Use, Sports Participation, and Well-Being in Adolescence: Cross-Sectional Findings From the UK Household
- 7 Longitudinal Study. *American Journal of Public Health* 2015;105(1):173-79. doi: 10.2105/AJPH.2013.301783
- 8 17. Trainor S, Delfabbro P, Anderson S, et al. Leisure activities and adolescent psychological well-being. *Journal of Adolescence* 2010;33(1):173-86. doi:
- 9 <https://doi.org/10.1016/j.adolescence.2009.03.013>
- 10 18. Landstedt E, Persson S. Bullying, cyberbullying, and mental health in young people. *Scandinavian journal of public health* 2014;42(4):393-9. doi:
- 11 10.1177/1403494814525004 [published Online First: 2014/03/13]
- 12 19. Przybylski AK, Bowes L. Cyberbullying and adolescent well-being in England: a population-based cross-sectional study. *The Lancet Child & Adolescent*
- 13 *Health* 2017;1(1):19-26. doi: 10.1016/S2352-4642(17)30011-1
- 14
- 15
- 16
- 17
- 18
- 19
- 20
- 21
- 22
- 23
- 24
- 25
- 26
- 27
- 28
- 29
- 30
- 31
- 32
- 33
- 34
- 35
- 36
- 37
- 38
- 39
- 40
- 41
- 42
- 43
- 44
- 45
- 46

**BMJ Paediatrics Open****The Impact of Health Behaviours and Deprivation on Wellbeing in a National Sample of English Young People**

|                               |                                                                                                                                                                                                                                                                                                              |
|-------------------------------|--------------------------------------------------------------------------------------------------------------------------------------------------------------------------------------------------------------------------------------------------------------------------------------------------------------|
| Journal:                      | <i>BMJ Paediatrics Open</i>                                                                                                                                                                                                                                                                                  |
| Manuscript ID                 | bmjpo-2018-000335.R1                                                                                                                                                                                                                                                                                         |
| Article Type:                 | Original article                                                                                                                                                                                                                                                                                             |
| Date Submitted by the Author: | 12-Jul-2018                                                                                                                                                                                                                                                                                                  |
| Complete List of Authors:     | Gireesh, Aswathikutty; University College London, Institute of Child Health<br>Das, Shikta; University College London, Institute of Cardiovascular<br>Science, MRC Unit for Lifelong Health and Ageing<br>Viner, Russell; UCL Institute of Child Health, Population, Policy & Practice<br>Research Programme |
| Keywords:                     | Adolescent Health, Sleep, Nutrition                                                                                                                                                                                                                                                                          |
|                               |                                                                                                                                                                                                                                                                                                              |

SCHOLARONE™  
Manuscripts

Review Only

**TITLE**

1  
2 The Impact of Health Behaviours and Deprivation on Wellbeing in a National Sample of  
3  
4 English Young People  
5  
6  
7

8  
9 Aswathikutty Gireesh MSc. <sup>a\*</sup>

10  
11 Shikta Das PhD <sup>a\*</sup>

12  
13  
14 Prof. Russell Viner M.B.B.S., PhD <sup>b</sup>  
15  
16

17 \*Joint first authors  
18  
19

20 <sup>a</sup> UCL Great Ormond Street Institute of Child Health, Population, Policy and Practice  
21 Programme, 30 Guilford Street, London WC1N 1EH, United Kingdom  
22  
23

24 <sup>b</sup> UCL Institute of Cardiovascular Science, MRC Unit for Lifelong Health and Ageing at  
25 UCL  
26  
27

28  
29  
30 Address for correspondence:  
31

32 Aswathikutty Gireesh  
33  
34

35 Great Ormond Street Institute of Child Health, Population, Policy and Practice Programme.  
36  
37 30, Guilford Street, London WC1N 1EH, UK.  
38  
39

40 Email address: [a.aswathikutty-gireesh@ucl.ac.uk](mailto:a.aswathikutty-gireesh@ucl.ac.uk)  
41  
42  
43  
44

45 **Word count:** 2574  
46  
47  
48  
49  
50  
51  
52  
53  
54  
55  
56  
57  
58  
59  
60

## ABSTRACT

**Objective:** To determine the malleable factors influencing wellbeing in boys and girls by accounting for deprivation, ethnicity and clustering within local authorities.

**Methods:** We used data from a very large nationally-representative survey, the What About Youth (WAY) study involving 120,115 adolescents aged 15 years. Our outcome measure of mental wellbeing was the Warwick-Edinburgh Mental Wellbeing Scale (WEMWBS). Potential explanatory factors included substance abuse, screen time, eating habits, reading, bullying, sleeping pattern, physical activity and area-level deprivation. We ran unadjusted and adjusted multilevel models for each explanatory factor, after adjusting for ethnicity, deprivation and including a random effect for the local authority.

**Results:** Boys had a higher overall mean WEMWBS score than girls ( $p < 0.0001$ ). In the adjusted model, each of multiple risk behaviours, eating habits, sleep, bullying, physical activity, screen-time and reading were independently associated with mental wellbeing in both boy and girls ( $P < 0.0001$  for both). Sleep and eating behaviours had a stronger effect in both sexes than bullying, physical activity and screen time.

**Conclusion:** The largest contributors to adolescent wellbeing appear to be sleep, eating behaviours and bullying when considered in a multivariable framework. Future longitudinal studies and health policies need to consider a range of behavioural factors to drive improvements in adolescent wellbeing.

## INTRODUCTION

There are growing concerns about the wellbeing of young people in modern societies particularly in the UK where there is evidence that young people's wellbeing is lower than in many comparable developed countries<sup>1,2</sup>.

Wellbeing is defined as “the state of being comfortable, healthy or happy”<sup>3</sup>. From a holistic perspective, wellbeing incorporates different dimensions of adolescent lives including social relationships as well as individual functioning<sup>4</sup>. However, the determinants of adolescent wellbeing is a relatively understudied area in comparison with the large literature on factors associated with mental health problems, as wellbeing concept has only been on greater focus over the past two decades<sup>5,6</sup>.

A wide range of factors have been shown to be related to adolescent wellbeing, including a range cognitive and relational factors such as bullying<sup>7</sup>, family structure and relationships<sup>8</sup>, peer support<sup>9</sup> and school connectedness<sup>10</sup>. Other behaviours also influence wellbeing, including substance use (alcohol, drugs and smoking habits)<sup>11-13</sup>, fruit and vegetable consumption<sup>14</sup>, breakfast consumption<sup>15</sup>, physical activity<sup>16</sup>, sleep duration<sup>17</sup>, sedentary behaviour<sup>7,18</sup> and leisure time activities<sup>19</sup>. However, published studies use a wide range of wellbeing measures, resulting in conflicting findings<sup>20,21</sup>. Furthermore, studies have largely focused on single risk factors and not explored how factors including behavioural factors interact to influence wellbeing. Additionally, given that many such behaviours are strongly socially patterned, studies have thus far paid little attention to confounding by socioeconomic position and issues relating to the clustering of behaviours and wellbeing within localities.

Policy initiatives to improve wellbeing amongst young people have largely focussed upon cognitive and psychological factors related to resilience to adversity, and have paid little attention to the contribution of non-psychological modifiable factors, such as other lifestyle behaviours. Understanding the potential contribution of modifiable behavioural factors to adolescent wellbeing may inform different strategies to improve young people's wellbeing.

We used a very large recent nationally-representative and population-based survey of English 15 year-olds to examine the contribution of individual-level modifiable behaviours to wellbeing, including potentially protective (sleep, reading, and physical activity) and risk behaviours (substance use, unhealthy eating habits and excessive screen time). Our objective was to identify modifiable behavioural factors for mental wellbeing in boys and girls using an adolescent-specific measure and accounting for deprivation, ethnicity and clustering within local authorities (LAs).

## METHODS

### Study design and sample

The What About Youth study (WAY) is a large-scale youth-oriented survey funded by the Department of Health (DH) in England and carried out by NHS Digital in 2014<sup>22</sup>. The primary aim of the survey was to collect robust local authority level data on youth health behaviours and general health to improve their health outcomes. Study participants were those who turned 15 years old in the academic year 2013/14. A random sampling methodology was employed to draw 298,080 participants from the National Pupil Database. The sample size was calculated to attain 1000 young people in each of 152 LAs in England; 2 LAs were merged with their nearest neighbours due to small size.

The achieved sample was 120,115 individuals, of whom 16% responded online and 84% via postal means (2,835 opted out). The response rates differed by gender, with adjusted response rates of 35% in boys and 49% in girls, and by deprivation, ethnicity and LA. Non-response weights using these factors were calculated to provide alignment between the achieved and target samples<sup>22</sup>. We obtained a fully anonymised cohort data electronically from the United Kingdom (UK) Data Service website<sup>22</sup>. The National Children's Bureau (NBC) carried out a detailed ethical review of the original study, but it was not required for this secondary data analysis.

## Outcome variable

Mental wellbeing was measured using the Warwick-Edinburgh Mental Wellbeing Scale (WEMWBS)<sup>23</sup>, a population-level wellbeing measure. It is validated to use in adolescents' aged 13 or more and focus primarily on positive aspects of mental wellbeing (Internal consistency,  $\alpha=0.90$ ). Participants indicate how often they feel like each of the 14 items using a 5-point scale that ranges from 5 "all the time" to 1 "none of the time"<sup>24</sup>. Total scores ranged from 14-70 and were calculated by summing each participant's responses. The potential explanatory behavioural variables were identified from the literature review of previous publication. A detail description of each variable is given in Appendix A.

A composite variable for risk behaviour index for substance use was constructed by the summation of three dichotomous risk behaviour variables: (a) Smoking: If currently smokes (b) Drinking alcohol: If drinks once a month or more frequently (c) Cannabis use: If ever tried cannabis. Based on the number of risk behaviours, we categorised it from "none" to "three". Similarly, composite unhealthy eating habit index was derived from (a) Skipping Breakfast: If avoided breakfast in last 7 days (b) Poor diet: If consumed less than 5 portions of fruits and vegetables a day (c) Takeaway food: If consumed takeaway food in past 7 days. Based on a combination of unhealthy behaviours, the composite score was categorised into 0= none, 1= only one, 2 =any two and 3 =all three. Physical active for 60+ minutes for at least 5 days were classified as "physically active" and the rest "physically inactive." This threshold was defined in line with government recommendations<sup>25 26</sup>, except for the intensity of exercise which was not available in the dataset. The selected threshold was taken at five days a week, as only 13% reported being physically active for seven days a week. A digital screen time variable was computed based on reported weekend and weekday usage of television, internet, smartphone and computer games. Subjects were categorised into "≥7hrs/day", "About 5-6 hours/day", "About 3 -4 hours/day", "About 2 hrs/day" and "≤1hrs/day". Time spent reading on weekends and weekdays had response options ranging

1 from none to seven hours per day. Based on the distribution of data, we recoded the variable  
2 as “none”, about half an hour/day”, “about 1 hour/day” and “2 hours /day”. The frequency of  
3  
4 as “none”, about half an hour/day”, “about 1 hour/day” and “2 hours /day”. The frequency of  
5  
6 eight hours sleep in the last seven days was coded as “every day”, “most days”, “some days”  
7  
8 and “not in the past 7 days”. Bullying was measured with Olweus Bully/Victim  
9  
10 Questionnaire, a reliable 8-item scale used to assess the bullying victimisation<sup>27</sup>. We  
11  
12 combined responses to create one overall measure of bullying experience (yes/no). In line  
13  
14 with a previous study<sup>28</sup>, adolescents who were bullied more than “two or three times a  
15  
16 month” were categorised as bullying victims.  
17  
18

19  
20  
21 Ethnicity, deprivation and mode of questionnaire completion were selected as confounders in  
22  
23 the relationship between wellbeing and potential explanatory variables as shown in previous  
24  
25 studies<sup>7</sup>. Ethnicity was self-identified by participants’ and was an adaptation of the 2001 UK  
26  
27 census categories, supplemented by questions on the national group. English Index of  
28  
29 Multiple Deprivation (IMD) was used as a measure of relative deprivation for small areas<sup>29</sup>.  
30  
31 IMD scores were divided into three deprivation categories as defined by quintiles of the  
32  
33 national distribution: 1 and 2 (high deprivation), 3 (average), 4 and 5 (low). Participants were  
34  
35 allowed to choose between online or postal modes of questionnaire completion.  
36  
37  
38  
39  
40

## 41 **Analyses**

42  
43 We conducted unadjusted and adjusted multilevel regression, in Stata 14 (Stata  
44  
45 Corp, College Station, TX). For wellbeing scores, the interaction between gender and health  
46  
47 behaviours was statistically significant ( $p < 0.001$ ) and therefore, analyses were stratified by  
48  
49 gender. All variables were plotted to check the distribution and normality was checked with  
50  
51 the Kolmogorov-Smirnov (K-S) test. All estimates were weighted by representativeness of  
52  
53 participants to compensate for the disproportionate selection of sample and non-response  
54  
55 bias. Pearson  $\chi^2$  tests were used to compare differences in the distribution of explanatory  
56  
57 variables by gender. An unadjusted analysis was run to test the association between each  
58  
59



independent variable (substance use, unhealthy eating habits, screen time, reading, bullying, physical activity and sleeping hours) and the outcome adolescent wellbeing (Model 1). The analyses were repeated in a multivariable analysis where ethnicity, mode of questionnaire delivery and IMD were added as confounders between each risk factor and outcome (Model 2). In model 3, all explanatory factors and covariates were included simultaneously to obtain associations between each variable and wellbeing scores after adjusting for confounders and other explanatory variables. LAs were treated as random effects in all models. Models were also tested for significant quadratic terms signifying curvilinear relationships; this was only significant for reading. The intraclass correlations coefficient (ICC), being the proportion of total variance attributable to differences at the LA level, was estimated using multilevel models for wellbeing with adjustment for IMD, ethnicity and mode of completion.

## Results

In total, 57,153 boys (47.82%) and 62,962 girls (52.18%) participated in the study (Table A1). Of these, boys had higher average wellbeing score in comparison to girls. The intraclass correlation coefficient (ICC) for the wellbeing score was 0.032 for girls and 0.024 for boys in the adjusted model, suggesting that variance in adolescent wellbeing is small at LA level.

Table A1 shows that there were significant differences in the distribution of potential explanatory variables between boys and girls. Girls had higher risk factors such as substance use, unhealthy eating habits, screen time and reported more bullying than boys. Protective variables such as sleeping hours (more than 8 hours) and reading were also significantly higher in girls than in boys.

**Table A1. Descriptive statistics for well-being scores and explanatory variables under study, by gender**

| Total                                                                                       |   | Boys          |   | Girls         |  | P value |
|---------------------------------------------------------------------------------------------|---|---------------|---|---------------|--|---------|
| N                                                                                           | N | Mean (SD) / % | N | Mean (SD) / % |  |         |
| <a href="https://mc.manuscriptcentral.com/bmjpo">https://mc.manuscriptcentral.com/bmjpo</a> |   |               |   |               |  |         |

|                                            | 120,115 | 57,153 | 47.58%    | 62,962 | 52.42%    |         |
|--------------------------------------------|---------|--------|-----------|--------|-----------|---------|
| <b>WEMWBS Scores<sup>a</sup></b>           | 117,842 | 56,352 | 47.82%    | 61,490 | 52.18%    | <0.0001 |
| Mean (SD)                                  |         |        | 50 (8.60) |        | 45 (9.66) |         |
| <b>Substance use<sup>b</sup></b>           | 71,133  | 32,516 | 45.71%    | 38617  | 54.29%    | <0.0001 |
| None                                       |         | 17,133 | 52.69     | 19932  | 51.61     |         |
| One                                        |         | 10,783 | 33.16     | 12150  | 31.46     |         |
| Two                                        |         | 3,010  | 9.26      | 3,785  | 9.8       |         |
| Three                                      |         | 1,590  | 4.89      | 2,750  | 7.12      |         |
| <b>Unhealthy Eating Habits<sup>c</sup></b> | 115918  | 55,289 | 47.70%    | 60,629 | 52.30%    | <0.0001 |
| None                                       |         | 12,081 | 21.85     | 11,951 | 19.71     |         |
| One                                        |         | 20,287 | 36.69     | 20,389 | 33.63     |         |
| Two                                        |         | 16,373 | 29.61     | 19,064 | 31.44     |         |
| Three                                      |         | 6,548  | 11.84     | 9,225  | 15.22     |         |
| <b>Sleeping hours (&gt;8 hrs)</b>          | 117,516 | 56,207 | 47.83%    | 61307  | 52.17%    | <0.0001 |
| Not in the past 7 days                     |         | 3676   | 6.54      | 6922   | 11.29     |         |
| some days                                  |         | 11051  | 19.66     | 16051  | 26.18     |         |
| most days                                  |         | 20,121 | 35.8      | 20928  | 34.14     |         |
| everyday                                   |         | 21,361 | 38        | 17406  | 28.39     |         |
| <b>Bullying</b>                            | 117,744 | 56,309 | 47.82%    | 61,435 | 52.18%    | <0.0001 |
| No                                         |         | 45,959 | 81.62     | 45,094 | 73.40     |         |
| yes                                        |         | 10,350 | 18.38     | 16,341 | 26.60     |         |
| <b>Physical activity</b>                   | 118450  | 56,674 | 47.85     | 61776  | 52.15     | <0.0001 |
| Physically active                          |         | 48,172 | 85        | 44,348 | 71.79     |         |
| Inactive                                   |         | 8,502  | 15        | 17,428 | 28.21     |         |
| <b>Screen time</b>                         | 118,845 | 56,892 | 47.87     | 61,943 | 52.13%    | <0.0001 |
| About 2 hrs/day                            |         | 3,609  | 6.34      | 3,469  | 5.6       |         |
| ≤1hrs/day                                  |         | 912    | 1.6       | 929    | 1.5       |         |
| About 3 -4 hours/day                       |         | 18,621 | 32.73     | 17,311 | 27.95     |         |
| About 5-6 hours/day                        |         | 17,198 | 30.23     | 17,850 | 28.82     |         |
| ≥7hrs/day                                  |         | 16,559 | 29.1      | 22387  | 36.14     |         |
| <b>Reading</b>                             | 118,140 | 56,513 | 47.84     | 61,627 | 52.16     | <0.0001 |
| None                                       |         | 14,278 | 25.26     | 9,875  | 16.02     |         |
| About Half an hour/day                     |         | 17,572 | 31.09     | 15,363 | 24.93     |         |
| About 1 hr/day                             |         | 12,505 | 22.13     | 13,442 | 21.81     |         |

<sup>a</sup> WEMWBS : Warwick-Edinburgh Mental Wellbeing score

<sup>b</sup> Risk behaviours include smoking, drinking and cannabis use

<sup>c</sup> Unhealthy eating habits include skipping breakfast, not having 5 portions of fruits and vegetables and consumption of takeaway food.

All explanatory variables and IMD were significantly associated with wellbeing in both sexes (Table A2). Wellbeing in both sexes decreased with use of substance use, unhealthy eating habits, bullying, physical activity and longer screen time in both sexes. Protective factors,

such as, sleeping more than eight hours and reading more than two hours were associated with higher wellbeing in both sexes.

**Table A2: Univariate analysis between well-being and explanatory variables, by gender**

|                                   | MODEL <sup>1</sup> |               |           |               |
|-----------------------------------|--------------------|---------------|-----------|---------------|
|                                   | Boys               |               | Girls     |               |
|                                   | <i>B</i>           | 95 % CI       | <i>B</i>  | 95 % CI       |
| <b>Substance Use</b>              |                    |               |           |               |
| None                              | Reference          |               | Reference |               |
| One                               | -0.34*             | [-0.56,-0.13] | -1.48**   | [-1.70,-1.27] |
| Two                               | -2.19**            | [-2.60,-1.78] | -4.96**   | [-5.35,-4.57] |
| Three                             | -3.56**            | [-4.16,-2.95] | -5.89**   | [-6.47,-5.30] |
| <b>Unhealthy Eating Habits</b>    |                    |               |           |               |
| None                              | Reference          |               | Reference |               |
| One                               | -1.65**            | [-1.88,-1.43] | -2.63**   | [-2.91,-2.34] |
| Two                               | -3.36**            | [-3.60,-3.12] | -4.85**   | [-5.13,-4.58] |
| Three                             | -5.00**            | [-5.39,-4.61] | -6.49**   | [-6.83,-6.14] |
| <b>Sleeping hours (&gt;8 hrs)</b> |                    |               |           |               |
| Not in the past 7 days            | Reference          |               | Reference |               |
| some days                         | 2.99**             | [2.51,3.47]   | 4.71**    | [4.39,5.04]   |
| most days                         | 5.59**             | [5.15,6.03]   | 8.39**    | [8.06,8.72]   |
| everyday                          | 7.49**             | [7.07,7.87]   | 10.70**   | [10.35,11.06] |
| <b>Bullying</b>                   |                    |               |           |               |
| No                                | Reference          |               | Reference |               |
| Yes                               | -4.70**            | [-3.59,-3.31] | -5.84**   | [-5.25,-4.90] |
| <b>Physical activity</b>          |                    |               |           |               |
| Physically active                 | Reference          |               | Reference |               |
| Inactive                          | -3.85**            | [-4.11,-3.61] | -2.77**   | [-3.04,-2.51] |
| <b>Screen time</b>                |                    |               |           |               |
| About 2 hrs/day                   | Reference          |               | Reference |               |
| ≤1hrs/day                         | 0.07               | [-0.59, 0.73] | 0.08      | [-0.69, 0.85] |
| About 3 -4 hours/day              | -1.22**            | [-1.60,-0.84] | -1.27**   | [-1.71,-0.83] |
| About 5-6 hours/day               | -2.17**            | [-2.51,-1.83] | -3.06**   | [-3.52,-2.60] |
| ≥= 7 hours / day                  | -3.72**            | [-4.12,-3.32] | -5.38**   | [-5.80,-4.97] |
| <b>Reading</b>                    |                    |               |           |               |
| None                              | Reference          |               | Reference |               |
| About Half an hour/day            | 1.61**             | [1.41,1.82]   | 2.17**    | [1.88,2.46]   |
| About 1 hr/day                    | 2.25**             | [2.06,2.44]   | 2.54**    | [2.26,2.82]   |
| ≥2hrs/day                         | 2.27***            | [2.01,2.52]   | 2.35**    | [2.05,2.66]   |
| <b>IMD Scores</b>                 |                    |               |           |               |
| High deprivation                  | Reference          |               | Reference |               |
| Average deprivation               | 0.57**             | [0.31,0.81]   | 0.35**    | [0.10,0.59]   |

|                   |           |               |           |               |
|-------------------|-----------|---------------|-----------|---------------|
| Least deprivation | 1.05**    | [0.87,1.21]   | 1.16**    | [0.92,1.40]   |
| <b>Ethnicity</b>  |           |               |           |               |
| White             | Reference |               | Reference |               |
| Mixed             | 0.18      | [-0.29,0.65]  | -0.44*    | [-0.82,-0.06] |
| Asian             | -0.54*    | [-0.85,-0.23] | 0.98**    | [0.59,1.38]   |
| Black             | 0.91**    | [0.42,1.39]   | 1.10**    | [0.67,1.52]   |
| Other             | -0.45*    | [-0.84,-0.04] | 0.30      | [-0.09,0.70]  |

<sup>1</sup>Unadjusted model taking into account clustering at Local Authority Level, Multilevel models fitted with weighted design weights, Quadratic function added to reading.

\*\* p<0.001, \* p<0.05

In the multivariable models adjusted for covariates (Table A3), poorer wellbeing was associated with multiple substances use and multiple unhealthy eating habits in a dose-dependent fashion. Being physically inactive, longer screen time and experiencing bullying were both associated with decrements in wellbeing in both sexes, with the association being stronger in girls than in boys.

**Table A3: Gender - stratified partially-adjusted and fully-adjusted multilevel modelling for well-being and explanatory variables**

| Variables                         | Boys               |               |                    |               | Girls              |               |                    |               |
|-----------------------------------|--------------------|---------------|--------------------|---------------|--------------------|---------------|--------------------|---------------|
|                                   | MODEL <sup>2</sup> |               | MODEL <sup>3</sup> |               | MODEL <sup>2</sup> |               | MODEL <sup>3</sup> |               |
|                                   | B                  | 95 % CI       | B                  | 95 % CI       | B                  | 95 % CI       | B                  | 95 % CI       |
| <b>Substance use</b>              |                    |               |                    |               |                    |               |                    |               |
| None                              | Reference          |               | Reference          |               | Reference          |               | Reference          |               |
| One                               | -0.40**            | [-0.61,-0.18] | -0.14              | [-0.36,0.08]  | -1.51**            | [-1.73,-1.30] | -0.77**            | [-0.97,-0.57] |
| Two                               | -2.16**            | [-2.57,-1.75] | -1.05**            | [-1.42,-0.67] | -4.84**            | [-5.22,-4.46] | -2.67**            | [-3.01,-2.33] |
| Three                             | -3.50**            | [-4.11,-2.88] | -1.63**            | [-2.16,-1.09] | -5.80**            | [-6.36,-5.23] | -2.79**            | [-3.35,-2.24] |
| <b>Eating Habits</b>              |                    |               |                    |               |                    |               |                    |               |
| None                              | Reference          |               | Reference          |               | Reference          |               | Reference          |               |
| One                               | -1.63**            | [-1.85,-1.41] | -0.89**            | [-1.18,-0.60] | -2.63**            | [-2.92,-2.34] | -1.37**            | [-1.69,-1.06] |
| Two                               | -3.31**            | [-3.55,-3.08] | -1.84**            | [-2.14,-1.54] | -4.84**            | [-5.12,-4.55] | -2.29**            | [-2.64,-1.96] |
| Three                             | -4.95**            | [-5.34,-4.56] | -2.44**            | [-2.82,-2.06] | -6.46**            | [-6.79,-6.10] | -2.61**            | [-3.04,-2.18] |
| <b>Sleeping hours (&gt;8 hrs)</b> |                    |               |                    |               |                    |               |                    |               |
| Not in the past 7 days            | Reference          |               | Reference          |               | Reference          |               | Reference          |               |
| some days                         | 2.98**             | [2.50,3.45]   | 2.69**             | [2.10,3.28]   | 4.69**             | [4.36,5.01]   | 3.71**             | [3.34,4.08]   |
| most days                         | 5.55**             | [5.11,5.99]   | 4.30**             | [3.78,4.82]   | 8.35**             | [8.01,8.69]   | 6.64**             | [6.28,7.00]   |
| everyday                          | 7.45**             | [7.03,7.86]   | 5.79**             | [5.29,6.28]   | 10.65**            | [10.29,11.01] | 8.16**             | [7.72,8.60]   |
| <b>Bullying</b>                   |                    |               |                    |               |                    |               |                    |               |
| No                                | Reference          |               | Reference          |               | Reference          |               | Reference          |               |
| Yes                               | -4.64**            | [-4.86,-4.42] | -3.78**            | [-4.09,-3.48] | -5.77**            | [-5.98,-5.56] | -4.01**            | [-4.23,-3.78] |
| <b>Physical activity</b>          |                    |               |                    |               |                    |               |                    |               |
| Physically active                 | Reference          |               | Reference          |               | Reference          |               | Reference          |               |
| Inactive                          | -3.78**            | [-4.02,-3.55] | -2.63**            | [-2.95,-2.30] | -2.77**            | [-3.04,-2.50] | -1.70**            | [-2.01,-1.39] |
| <b>Screen time</b>                |                    |               |                    |               |                    |               |                    |               |
| About 2 hrs/day                   | Reference          |               | Reference          |               | Reference          |               | Reference          |               |
| ≤1hrs/day                         | 0.09               | [-0.57,0.75]  | 0.34               | [-0.58,1.26]  | 0.09               | [-0.69,0.87]  | -0.38              | [-1.49,0.72]  |
| About 3 -4 hours/day              | -1.22**            | [-1.60,-0.83] | -0.61*             | [-0.99,-0.23] | -1.26**            | [-1.70,-0.83] | -0.54              | [-1.14,0.05]  |
| About 5-6 hours/day               | -2.15**            | [-2.50,-1.81] | -0.82**            | [-1.27,-0.37] | -3.04**            | [-3.49,-2.58] | -1.21**            | [-1.75,-0.67] |
| ≥= 7 hours / day                  | -3.67**            | [-4.06,-3.27] | -1.20**            | [-1.65,-0.75] | -5.32**            | [-5.73,-4.90] | -1.81**            | [-2.29,-1.33] |

| <b>Reading</b>                        |           |             |           |              |           |             |           |              |           |
|---------------------------------------|-----------|-------------|-----------|--------------|-----------|-------------|-----------|--------------|-----------|
| None                                  | Reference |             | Reference |              | Reference |             | Reference |              | Reference |
| About Half an hour/day                | 1.59**    | [1.38,1.80] | 0.57**    | [0.26,0.88]  | 2.13**    | [1.84,2.42] | 0.56**    | [0.23,0.90]  |           |
| About 1 hr/day                        | 2.24**    | [2.04,2.43] | 1.04**    | [0.79,1.29]  | 2.51**    | [2.24,2.78] | 0.60**    | [0.26,0.93]  |           |
| ≥2hrs/day                             | 2.28**    | [2.05,2.54] | 0.90**    | [0.55,1.25]  | 2.34**    | [2.03,2.64] | 0.33*     | [0.02,0.64]  |           |
| <b>IMD Scores</b>                     |           |             |           |              |           |             |           |              |           |
| High deprivation                      | --        | --          | Reference |              | --        | --          | Reference |              |           |
| Average deprivation                   | --        | --          | -0.12     | [-0.38,0.14] | --        | --          | 0.16      | [-0.16,0.49] |           |
| Least deprivation                     | --        | --          | 0.17      | [-0.06,0.40] | --        | --          | 0.36*     | [0.06,0.66]  |           |
| <b>Ethnicity</b>                      |           |             |           |              |           |             |           |              |           |
| White                                 | --        | --          | Reference |              | --        | --          | Reference |              |           |
| Mixed                                 | --        | --          | -0.06     | [0.81,-0.59] | --        | --          | 0.44      | [-0.08,0.96] |           |
| Asian                                 | --        | --          | -0.09     | [0.81,-0.84] | --        | --          | 0.35      | [-0.53,1.23] |           |
| Black                                 | --        | --          | 0.99*     | [0.01,0.25]  | --        | --          | 1.75**    | [1.20,2.31]  |           |
| Other                                 | --        | --          | -0.59     | [0.02,-1.09] | --        | --          | -0.19     | [-0.88,0.49] |           |
| <b>Mode of questionnaire delivery</b> |           |             |           |              |           |             |           |              |           |
| Online                                | --        | --          |           |              | --        | --          |           |              |           |
| paper                                 | --        | --          | 0.24      | [-0.03,0.51] | --        | --          | 1.26**    | [0.99,1.53]  |           |

<sup>2</sup> Each predictor variable adjusted for ethnicity, mode of questionnaire delivery and Index of multiple deprivation

<sup>3</sup> All Variables mutually adjusted for each other

Note: Multilevel models fitted with weighted design weights, Quadratic function added to reading.

\*\* p<0.001, \* p<0.05

Higher wellbeing was associated with number of days young people achieved more than eight hours of sleep again in a dose-dependent fashion. Habitual reading most days was associated with higher wellbeing although there was no evidence of a dose-response above 30 minutes per day in the fully adjusted model (Figure 1). Young people from black ethnic groups had significantly higher wellbeing in both sexes. Deprivation was not associated with wellbeing amongst boys but was amongst girls.

## Discussion

This study broadens our understanding of risk and protective factors associated with wellbeing in adolescence, using a very large nationally representative survey to examine a wide spectrum of behavioural and psychosocial factors relating to youth wellbeing and taking into account deprivation and clustering at LA level. The study shows that young people who reported lower levels of wellbeing were more likely to have engaged in multiple unhealthy eating habits and substance use; be victims of bullying; have exercised insufficiently; have exceeded recommended screen time use. These findings were robust to mutual adjustment for all variables and for deprivation, ethnicity, and mode of questionnaire delivery. A dose-response pattern was also observed between wellbeing and health behaviours such as substance use, unhealthy eating habits and sleeping pattern. A decrease in the number of risk behaviours and an increase in the number of days slept for more than eight hours, corresponded with an increase in average levels of wellbeing. The impact of deprivation on wellbeing was surprisingly small, as was LA locality variance, suggesting that variance in wellbeing lies largely in behavioural and psychological factors.

Since different studies have used different variables to define various aspects of wellbeing in the analyses, comparison with other studies is difficult. We found boys reported higher mean wellbeing than girls, consistent with national reports for England<sup>30 31</sup>, but in contrast to findings from recent Health Survey England (HSE) 2015, where only slight gender variations were observed<sup>32</sup>. The proportions reporting each of the behaviours were broadly similar to those found in other recent national surveys<sup>31 33 34</sup>. Girls reported higher levels of risky

1 health behaviours including current smoking, alcohol consumption, bullying, lower levels of  
2 physical activity, on the other hand, boys were more likely to report higher levels of physical  
3 activity and these were consistent with findings from the HBSC England <sup>33</sup>.

4  
5  
6  
7  
8  
9 These findings corroborate with two previous studies where happiness as a marker of  
10 wellbeing was found to be positively associated with multiple health protective behaviours  
11 (sport's participation and healthier eating ) and negatively associated with multiple risk  
12 behaviours (smoking, alcohol use and heavy screen use) in adolescents <sup>35 36</sup>. Our finding that  
13 substance use was associated with lower wellbeing is similar to that seen in other studies, as  
14 were our findings for being bullied <sup>7</sup>. The association of sleep duration and reading with  
15 wellbeing in young people has been little studied. Leisure time and adequate sleep have been  
16 identified as being associated with wellbeing <sup>17 19</sup>, however ours is the first to examine these  
17 alongside other behavioural and psychological factors.

18  
19  
20  
21  
22  
23  
24  
25  
26  
27  
28  
29  
30  
31 We found an association between deprivation and lower wellbeing, although in contrast to  
32 previous studies <sup>37</sup> the effect size was small and we found no association in boys. This may  
33 reflect the lack of adjustment for multiple behaviours, ethnicity and area effects in other  
34 studies. Our finding suggests that much of what has previously been understood, as unhealthy  
35 behaviours themselves associated with deprivation may mediate deprivation effects. We  
36 found that young people black ethnic groups reported significantly higher wellbeing in both  
37 sexes, consistent with previous UK findings <sup>38</sup>. However, the reasons for this remain unclear  
38 and require further study. We found this association to be robust to adjustment for  
39 deprivation and all significant behavioural and psychological factors, suggesting this likely  
40 relates to factors not measured in our study.

41  
42  
43  
44  
45  
46  
47  
48  
49  
50  
51  
52  
53  
54  
55 We used a large, nationally representative sample of ethnically and socioeconomically  
56 diverse adolescents. Prior studies have examined very few health behaviours and relied on  
57 proxy measures of wellbeing rather than on population-level wellbeing measures that tap into  
58  
59  
60



1  
2 both feelings and psychological flourishing. In our study, associations between wellbeing and  
3  
4 behavioural factors were examined within a multivariable and multilevel framework, using a  
5  
6 validated wellbeing scale with robust psychometric properties.  
7

8  
9 Our findings are subject to a number of limitations. Our data were cross-sectional and thus  
10  
11 the direction of causality is unclear for the behavioural variables. Participant responses could  
12  
13 be influenced by social desirability, and those with poor wellbeing may be inclined towards  
14  
15 endorsing questions more than others, thus introducing bias. The direction of such biases is  
16  
17 unclear, however, we note that girls (who had a higher response rate in the overall survey)  
18  
19 reported higher levels of both more risky and protective behaviours than boys, potentially  
20  
21 reflecting social desirability biases. All variables used were self-reported except for area-  
22  
23 level deprivation. We have also repeated analysis excluding the outliers and that did not  
24  
25 materially affect the findings. We used bullying victimization as a proxy for psychological  
26  
27 problems due to the lack of more appropriate variables in the dataset; thus it is possible that  
28  
29 some of the associations seen here result from inadequate adjustment for psychological  
30  
31 issues. We combined variables across domains into composite variables; this may have  
32  
33 introduced bias although the direction of bias is unclear.  
34  
35  
36  
37  
38  
39  
40

## 41 **Conclusion**

42  
43 Our findings suggest that promoting healthy sleep, reading, and healthy eating  
44  
45 behaviours may present important policy targets for enhancing adolescent wellbeing in  
46  
47 addition to more accepted foci on physical activity, screen time and bullying. Future work is  
48  
49 needed to examine these factors within a longitudinal causal framework.  
50  
51  
52  
53  
54  
55  
56  
57  
58  
59  
60

**What is already known on this topic?**

Young people's wellbeing may be affected by multiple individual and contextual factors.

Key determinants of adolescent wellbeing remain unclear.

Few studies have examined a wide range of potential determinants whilst adjusting for area-level deprivation.

**What this study adds?**

Findings support current policy foci on bullying, physical activity and screen-time as correlates of wellbeing amongst young people.

Sleep and eating behaviours may also be important policy targets for promoting adolescent wellbeing.

A coherent policy framework to promote adolescent wellbeing needs to be multifaceted and consider a range of health factors in young people's lives

## **Funding Sources**

This report is independent research commissioned and funded by the National Institute for Health Research Policy Research Programme. The views expressed in this publication are those of the author(s) and not necessarily those of the NHS, the National Institute for Health Research, the Department of Health or its arm's length bodies, and other Government Departments.

## **Conflicts of interests**

The authors have no conflicts of interest to disclose

## **Contributors**

AG & SD led the writing of the study and undertook the analyses. RV conceptualised the project, contributed to the ideas underlying the article, contributed to writing and revision of the article.

## **Acknowledgement**

Preliminary findings of this paper were presented at the Adolescent Lives and Wellbeing 2017 Conference organised by University College London.

## References

1. Patton GC, Sawyer SM, Santelli JS, et al. Our future: a Lancet commission on adolescent health and wellbeing. *Lancet (London, England)* 2016;387(10036):2423-78. doi: 10.1016/s0140-6736(16)00579-1 [published Online First: 2016/05/14]
2. RCPCH. State of Child Health Report Royal College of Paediatrics and Child Health; 2017 [Available from: <http://www.thehealthwell.info/node/1062390> accessed 6th November 2017.
3. Oxford University Press. Oxford Dictionary. Oxford: Oxford University Press 2016.
4. Žukauskienė R. Adolescence and Well-Being. In: Ben-Arieh A, Casas F, Frønes I, et al., eds. Handbook of Child Well-Being: Theories, Methods and Policies in Global Perspective. Dordrecht: Springer Netherlands 2014:1713-38.
5. Das JK, Salam RA, Lassi ZS, et al. Interventions for Adolescent Mental Health: An Overview of Systematic Reviews. *Journal of Adolescent Health* 2016;59(4, Supplement):S49-S60. doi: <https://doi.org/10.1016/j.jadohealth.2016.06.020>
6. Keyes CL. Promoting and protecting mental health as flourishing: a complementary strategy for improving national mental health. *The American psychologist* 2007;62(2):95-108. doi: 10.1037/0003-066x.62.2.95 [published Online First: 2007/02/28]
7. Przybylski AK, Bowes L. Cyberbullying and adolescent well-being in England: a population-based cross-sectional study. *The Lancet Child & Adolescent Health* 2017;1(1):19-26. doi: 10.1016/S2352-4642(17)30011-1
8. Dinisman T, Andresen S, Montserrat C, et al. Family structure and family relationship from the child well-being perspective: Findings from comparative analysis. *Children and Youth Services Review* 2017;80(Supplement C):105-15. doi: <https://doi.org/10.1016/j.childyouth.2017.06.064>
9. Raja SN, McGee R, Stanton WR. Perceived attachments to parents and peers and psychological well-being in adolescence. *Journal of Youth and Adolescence* 1992;21(4):471-85. doi: 10.1007/bf01537898
10. García Bacete FJ, Marande Perrin G, Schneider BH, et al. Effects of School on the Well-Being of Children and Adolescents. In: Ben-Arieh A, Casas F, Frønes I, et al., eds. Handbook of Child Well-Being:

- 1  
2 Theories, Methods and Policies in Global Perspective. Dordrecht: Springer Netherlands 2014:1251-  
3  
4 305.  
5
- 6 11. Taylor G, McNeill A, Girling A, et al. Change in mental health after smoking cessation: systematic review  
7  
8 and meta-analysis. *BMJ : British Medical Journal* 2014;348 doi: 10.1136/bmj.g1151  
9
- 10 12. Farmer S, Hanratty B. The relationship between subjective wellbeing, low income and substance use  
11  
12 among schoolchildren in the north west of England: a cross-sectional study. *Journal of Public Health*  
13  
14 2012;34(4):512-22. doi: 10.1093/pubmed/fds022  
15  
16
- 17 13. Phillips-Howard PA, Bellis MA, Briant LB, et al. Wellbeing, alcohol use and sexual activity in young  
18  
19 teenagers: findings from a cross-sectional survey in school children in North West England. *Substance*  
20  
21 *abuse treatment, prevention, and policy* 2010;5:27. doi: 10.1186/1747-597x-5-27 [published Online  
22  
23 First: 2010/11/12]  
24  
25
- 26 14. Conner TS, Brookie KL, Carr AC, et al. Let them eat fruit! The effect of fruit and vegetable consumption  
27  
28 on psychological well-being in young adults: A randomized controlled trial. *PLoS ONE*  
29  
30 2017;12(2):e0171206. doi: 10.1371/journal.pone.0171206  
31  
32
- 33 15. Lien L. Is breakfast consumption related to mental distress and academic performance in adolescents?  
34  
35 *Public Health Nutrition* 2007;10(4):422-28. doi: 10.1017/S1368980007258550 [published Online First:  
36  
37 04/01]  
38
- 39 16. Ussher MH, Owen CG, Cook DG, et al. The relationship between physical activity, sedentary behaviour  
40  
41 and psychological wellbeing among adolescents. *Social Psychiatry and Psychiatric Epidemiology*  
42  
43 2007;42(10):851-56. doi: 10.1007/s00127-007-0232-x  
44
- 45 17. Fuligni AJ, Hardway C. Daily Variation in Adolescents' Sleep, Activities, and Psychological Well-Being.  
46  
47 *Journal of Research on Adolescence* 2006;16(3):353-78. doi: 10.1111/j.1532-7795.2006.00498.x  
48
- 49 18. Hamer M, Yates T, Sherar LB, et al. Association of after school sedentary behaviour in adolescence with  
50  
51 mental wellbeing in adulthood. *Preventive Medicine* 2016;87(Supplement C):6-10. doi:  
52  
53 <https://doi.org/10.1016/j.ypped.2016.02.021>  
54  
55
- 56 19. Trainor S, Delfabbro P, Anderson S, et al. Leisure activities and adolescent psychological well-being.  
57  
58 *Journal of Adolescence* 2010;33(1):173-86. doi: <https://doi.org/10.1016/j.adolescence.2009.03.013>  
59  
60

- 1  
2 20. Pollard EL, Lee PD. Child Well-being: A Systematic Review of the Literature. *Social Indicators Research*  
3  
4 2003;61(1):59-78. doi: 10.1023/a:1021284215801  
5  
6 21. Rose T, Joe S, Williams A, et al. Measuring Mental Wellbeing Among Adolescents: A Systematic Review  
7  
8 of Instruments. *Journal of Child and Family Studies* 2017;26(9):2349-62. doi: 10.1007/s10826-017-  
9  
10 0754-0  
11  
12 22. Health and Social Care Information Centre. What About YOUth? Survey. England: UK Data Service,  
13  
14 2016.  
15  
16 23. Tennant R, Hiller L, Fishwick R, et al. The Warwick-Edinburgh Mental Well-being Scale (WEMWBS):  
17  
18 development and UK validation. *Health and Quality of Life Outcomes* 2007;5:63-63. doi:  
19  
20 10.1186/1477-7525-5-63  
21  
22 24. Taggart F, Stewart-Brown S, Parkinson J. Warwick-Edinburgh Mental Well-being Scale (WEMWBS)  
23  
24 Scotland: NHS Health Scotland; 2015 [Available from:  
25  
26 [http://www.healthscotland.com/uploads/documents/26787-  
29  
30 WEMWBS%20User%20Guide%20Version%202%20May%202015.pdf](http://www.healthscotland.com/uploads/documents/26787-<br/>27<br/>28 WEMWBS%20User%20Guide%20Version%202%20May%202015.pdf) accessed 19th October 2017.  
31  
32 25. Morgan K, Hallingberg B, Littlecott H, et al. Predictors of physical activity and sedentary behaviours  
33  
34 among 11-16 year olds: Multilevel analysis of the 2013 Health Behaviour in School-aged Children  
35  
36 (HBSC) study in Wales. *BMC Public Health* 2016;16:569. doi: 10.1186/s12889-016-3213-8  
37  
38 26. Booth ML, Okely AD, Chey T, et al. The reliability and validity of the physical activity questions in the  
39  
40 WHO health behaviour in schoolchildren (HBSC) survey: a population study. *British journal of sports*  
41  
42 *medicine* 2001;35(4):263-7. [published Online First: 2001/07/31]  
43  
44 27. Olweus D. The Revised Olweus Bully/Victim Questionnaire. University of Bergen: Research Center for  
45  
46 Health Promotion (HEMIL Center) 1996.  
47  
48 28. Cook CR, Williams KR, Guerra NG, et al. Predictors of bullying and victimization in childhood and  
49  
50 adolescence: A meta-analytic investigation. *School Psychology Quarterly* 2010;25(2):65-83. doi:  
51  
52 10.1037/a0020149  
53  
54 29. Department for Communities and Local Government. The English indices of deprivation London2015  
55  
56 [Available from:  
57  
58  
59  
60

- 1  
2 [https://www.gov.uk/government/uploads/system/uploads/attachment\\_data/file/465791/English\\_Indices](https://www.gov.uk/government/uploads/system/uploads/attachment_data/file/465791/English_Indices)  
3  
4 [of Deprivation 2015 - Statistical Release.pdf](https://www.gov.uk/government/uploads/system/uploads/attachment_data/file/465791/English_Indices_of_Deprivation_2015_-_Statistical_Release.pdf)  
5
- 6 30. Office of National Statistics. Measuring National Well-being: Insights into children's mental health and  
7 well-being. England, 2015.  
8  
9
- 10 31. Office of National Statistics. Young people's well-being England: Office for National Statistics; 2017  
11 [Available from:  
12 <https://www.ons.gov.uk/peoplepopulationandcommunity/wellbeing/articles/youngpeopleswellbeingand>  
13 [personalfinance/2017](https://www.ons.gov.uk/peoplepopulationandcommunity/wellbeing/articles/youngpeopleswellbeingand) accessed 10th November 2017.  
14  
15  
16  
17  
18
- 19 32. Fuller E, Morris S. Health Survey for England. London NHS Digital, 2015.  
20
- 21 33. Currie C, Griebler R, Inchley J. Health Behaviour in School-Aged Children (HBSC) Study Protocol:  
22 Background, Methodology and Mandatory Items for the 2009/10 Survey. Edinburgh: CAHRU 2010.  
23  
24
- 25 34. Brooks F, Magnusson J, Klemra E, et al. Health Behaviours of School-Aged Children (HBSC) 2013-2014  
26 England2014 [Available from: [www.hbscengland.com](http://www.hbscengland.com).  
27  
28  
29
- 30 35. Booker CL, Skew AJ, Sacker A, et al. Well-Being in Adolescence—An Association With Health-Related  
31 Behaviors: Findings From Understanding Society, the UK Household Longitudinal Study. *The Journal*  
32 *of Early Adolescence* 2014;34(4):518-38. doi: 10.1177/0272431613501082  
33  
34  
35  
36
- 37 36. Booker CL, Skew AJ, Kelly YJ, et al. Media Use, Sports Participation, and Well-Being in Adolescence:  
38 Cross-Sectional Findings From the UK Household Longitudinal Study. *American Journal of Public*  
39 *Health* 2015;105(1):173-79. doi: 10.2105/AJPH.2013.301783  
40  
41  
42
- 43 37. Candace Currie, Cara Zanotti, Antony Morgan, et al. Social determinants of health and well-being among  
44 young people. International report from the 2009/2010 survey. Health Behavior in school-age children  
45 (HBSC) study. Denmark: WHO Regional Office for Europe, 2012:252.  
46  
47  
48
- 49 38. Patalay P, Fitzsimons E. Correlates of Mental Illness and Wellbeing in Children: Are They the Same?  
50 Results From the UK Millennium Cohort Study. *Journal of the American Academy of Child &*  
51 *Adolescent Psychiatry* 2016;55(9):771-83. doi: 10.1016/j.jaac.2016.05.019  
52  
53  
54  
55  
56  
57  
58  
59  
60

Confidential: For Review Only

1  
2  
3  
4  
5  
6  
7  
8  
9  
10  
11  
12  
13  
14  
15  
16  
17  
18  
19  
20  
21  
22  
23  
24  
25  
26  
27  
28  
29  
30  
31  
32  
33  
34  
35  
36  
37  
38  
39  
40  
41  
42  
43  
44  
45  
46  
47  
48  
49  
50  
51  
52  
53  
54  
55  
56  
57  
58  
59  
60



1  
2  
3  
4  
5  
6  
7  
8  
9  
10  
11  
12  
13  
14  
15  
16  
17  
18  
19  
20  
21  
22  
23  
24  
25  
26  
27  
28  
29  
30  
31  
32  
33  
34  
35  
36  
37  
38  
39  
40  
41  
42  
43  
44  
45  
46  
47  
48  
49  
50  
51  
52  
53  
54  
55  
56  
57  
58  
59  
60

Figure 1

Relationship between wellbeing and health behaviours: (A) Risk Factors (B) Protective Factors

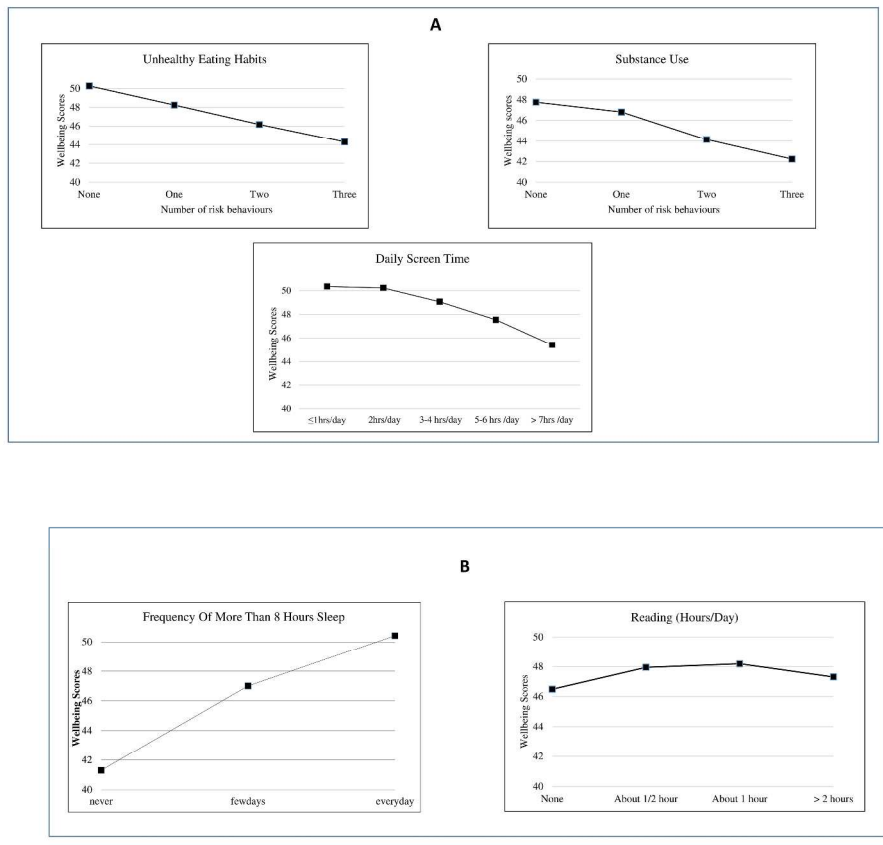

Only

## APPENDIX A

### (i) VARIABLE DESCRIPTION

| Composite variables                      | Original variables                                                                                                                                                                                                                                                                                                               | Variable labels               | Composite variables                                                                                                                                                                                                                                                                                                                                                                                                                                                                                                                                                                                                                                                                                                                                                                                                                                                                                                                                                    |
|------------------------------------------|----------------------------------------------------------------------------------------------------------------------------------------------------------------------------------------------------------------------------------------------------------------------------------------------------------------------------------|-------------------------------|------------------------------------------------------------------------------------------------------------------------------------------------------------------------------------------------------------------------------------------------------------------------------------------------------------------------------------------------------------------------------------------------------------------------------------------------------------------------------------------------------------------------------------------------------------------------------------------------------------------------------------------------------------------------------------------------------------------------------------------------------------------------------------------------------------------------------------------------------------------------------------------------------------------------------------------------------------------------|
| <b>Substance use risk</b> <sup>1-6</sup> | <b>Definitions were:</b><br>Smoking: Cigarette smoking status (currently smoke)<br>Drinking: Alcohol drinking status (Usually have an alcoholic drink once a month or more frequently)<br>Cannabis: Cannabis use status (Ever tried cannabis)                                                                                    | SmkSt2<br>alcfrq1<br>Cantry   | <b>Alcohol + smoking + cannabis</b><br>(1) Smoking risk: If currently smokes (2) Drinking risk: If drinks once a month or more frequently (3) Cannabis risk: If ever tried cannabis. Each item was coded 0 for “no” and 1 for “yes”. The composite score obtained ranged from zero to three based on the number of risk behaviours; (0= None, 1= Only one, 2 =Any two and 3 =All three                                                                                                                                                                                                                                                                                                                                                                                                                                                                                                                                                                                 |
| <b>Physical Activity</b> <sup>7,8</sup>  | <b>Physical activity: in line with general recommendations</b><br>How many days physically active for 60+ minutes, in last 7 days ( Active for more than 5 days )<br><br>How often usually exercise in free time (Active for more than twice a week)<br><br>How many hours usually exercise in free (Active for an hour or more) | Physact<br>ExerOft<br>ExerHrs | <b>Duration of exercise + Frequency of exercise + Number of days met recommended guidelines</b><br>The first question on moderate to vigorous physical activity was “Over the past 7 days, on how many days you were physically active for a total of at least 60 minutes per day and responses ranged from 0 to 7. Second, the participants were asked “Outside school hours: how often do you usually exercise in your free time so much that you get out of breath or sweat?” with responses from less than a once a month to every day. The question on duration was “Outside school hours: how many hours do you usually exercise in your free time so much that you get out of breath or sweat?”, with responses from none to 7 or more hours. Adolescents who exercised for more than twice a week for an hour or more or were physically active for 60+ minutes for at least 5 days were classified as “physically active” and the rest “physically inactive”. |
| <b>Sleeping habits</b> <sup>9,10</sup>   | <b>Sleeping frequency in last week</b><br>How often slept 8+ hours per night in last 7 days                                                                                                                                                                                                                                      | Sleep8pn                      | The question was “Over the past 7 days, how often did you sleep for 8 hours or more” and the responses were “every day”, “most days”, “some days” and “not in the past 7 days”.                                                                                                                                                                                                                                                                                                                                                                                                                                                                                                                                                                                                                                                                                                                                                                                        |

1  
2  
3  
4  
5  
6  
7  
8  
9  
10  
11  
12  
13  
14  
15  
16  
17  
18  
19  
20  
21  
22  
23  
24  
25  
26  
27  
28  
29  
30  
31  
32  
33  
34  
35  
36  
37  
38  
39  
40  
41  
42  
43  
44  
45  
46

**Eating Habits <sup>11-13</sup>**

**Definition of each unhealthy eating habits were:**

|                                                                                                               |          |
|---------------------------------------------------------------------------------------------------------------|----------|
| How often eaten take-away food in last 7 days (unhealthy habit if taken takeaway in past seven days)          | Eattake  |
| How often eaten breakfast in last 7 days (unhealthy habit if breakfast not taken regularly)                   | Eatbfst  |
| Consumed more than five portions of fruit and veg yesterday ( unhealthy habit if 5-A-DAY not taken regularly) | FV5ormor |

**Breakfast consumption + take away food + 5 A day**

(1) Skipping Breakfast: If avoided breakfast in last 7 days (2) Poor diet: If consumed less than 5 portions of fruits and vegetables a day (3) Takeaway food: If consumed takeaway food in past 7 days. Each item was coded 0 for “no” and 1 for “yes”. According to the number of unhealthy eating habits participant’s exhibited, a risk score from zero to three (0= None, 1= Only one, 2 =Any two and 3 =All three) was given

**Screen time <sup>8 14-16</sup>**

**Definitions of screen time derived as follows (Weekend and weekday hours combined)**

|                                                                 |                     |
|-----------------------------------------------------------------|---------------------|
| Hours per day watching TV                                       | Watchwk,<br>Watchwe |
| Hours per day spent playing computer games                      | Compwk ,<br>Compwe  |
| Hours per day spent on computers for communicating, or homework | Comphwk,<br>Comphwe |
| Hours per day spent on smart phone                              | Smartwk,<br>Smartwe |

**TV +\_computer games + internet**

FOR ALL, Response options for each item were ‘none at all’, ‘about half an hour a day’, ‘about 1 hour a day’, ‘about 2 hours a day’, ‘about 3 hours a day’, ‘about 4 hours a day’, ‘about 5 hours a day’, ‘about 6 hours a day’ and ‘about 7 or more hours a day’. The total screen time was calculated by grouping the similar options of each item and by combining both weekends and weekdays. Subjects were then categorised into “≥7hrs/day”, “About 5-6 hours/day”, “About 3 -4 hours/day”, “About 2 hrs/day” and “≤1hrs/day”.

**Reading <sup>17</sup>**

**Definitions of reading derived as follows:**

|                                                  |                   |
|--------------------------------------------------|-------------------|
| Hours per day spent reading outside school hours | Readwk,<br>Readwe |
|--------------------------------------------------|-------------------|

**Reading hours (Weekend + weekdays)**

“About how many hours a day do you usually spend sitting down reading books, magazines or newspapers (including e-readers, online newspapers, and magazines) and studying when you are not at school?”. The questions were asked for weekends and weekdays separately. The response options ranged from none to ≥ 7 hours per day

**Bullying <sup>18 19</sup>**

**Frequency with which the behaviour occurred over the past couple of months:**

**Traditional bullying (physical+ verbal + relational)**

|                                                                                                                  |          |
|------------------------------------------------------------------------------------------------------------------|----------|
| I was called mean names, was made fun of, or teased in a hurtful way                                             | Bllynam  |
| Other people left me out of things on purpose, excluded me from their group of friends, or completely ignored me | Blllyout |
| I was hit, kicked, pushed, shoved around, or locked indoors”                                                     | Blllyhit |
| Other people lied or spread rumours                                                                              | Blllylie |
| Made fun of me because of weight                                                                                 | Blllyfun |
| Sexual jokes/comments                                                                                            | Blllysex |

Bullying measure was meant to assess the extent to which they had recently experienced other children directing different types of bullying towards themselves. Six statements reflecting traditional bullying (physical, verbal, and relational) were asked. Questions were rated by participants using a 5-point response scale that ranged from 0=“I haven’t been bullied this way in the past couple of months” 1=“It has happened once or twice”, 2=“2 or 3 times a month”, 3=“2 or 3 times a week”, to 4=“Several times a week.”

## (ii) Individual Items and scoring of Warwick-Edinburgh Mental Well-being scale (WEMWBS)

|                                                        |                                                                                                                                                                                                                               |
|--------------------------------------------------------|-------------------------------------------------------------------------------------------------------------------------------------------------------------------------------------------------------------------------------|
| 1. I’ve been feeling optimistic about the future       | Each of the 14 item responses in WEMWBS are scored from 1 (none of the time), 2 (rarely), 3 (some of the time), 4 (often) to 5 (all of the time). A total scale score is calculated by summing the 14 individual item scores. |
| 2. I’ve been feeling useful                            |                                                                                                                                                                                                                               |
| 3. I’ve been feeling relaxed                           |                                                                                                                                                                                                                               |
| 4. I’ve been feeling interested in other people        |                                                                                                                                                                                                                               |
| 5. I’ve had energy to spare                            |                                                                                                                                                                                                                               |
| 6. I’ve been dealing with problems well                |                                                                                                                                                                                                                               |
| 7. I’ve been thinking clearly                          |                                                                                                                                                                                                                               |
| 8. I’ve been feeling good about myself                 |                                                                                                                                                                                                                               |
| 9. I’ve been feeling close to other people             |                                                                                                                                                                                                                               |
| 10. I’ve been feeling confident                        |                                                                                                                                                                                                                               |
| 11. I’ve been able to make up my own mind about things |                                                                                                                                                                                                                               |
| 12. I’ve been feeling loved                            |                                                                                                                                                                                                                               |
| 13. I’ve been interested in new things                 |                                                                                                                                                                                                                               |
| 14. I’ve been feeling cheerful                         |                                                                                                                                                                                                                               |

## REFERENCES

1. Farmer S, Hanratty B. The relationship between subjective wellbeing, low income and substance use among schoolchildren in the north west of England: a cross-sectional study. *Journal of Public Health* 2012;34(4):512-22. doi: 10.1093/pubmed/fds022
2. Phillips-Howard PA, Bellis MA, Briant LB, et al. Wellbeing, alcohol use and sexual activity in young teenagers: findings from a cross-sectional survey in school children in North West England. *Substance abuse treatment, prevention, and policy* 2010;5:27. doi: 10.1186/1747-597x-5-27 [published Online First: 2010/11/12]
3. Newcomb MD, Bentler PM, Collins C. Alcohol Use and Dissatisfaction with Self and Life: A Longitudinal Analysis of Young Adults. *Journal of Drug Issues* 1986;16(4):479-94. doi: 10.1177/002204268601600401
4. Bergman MM, Scott J. Young adolescents' wellbeing and health-risk behaviours: gender and socio-economic differences. *Journal of Adolescence* 2001;24(2):183-97. doi: <https://doi.org/10.1006/jado.2001.0378>
5. Taylor G, McNeill A, Girling A, et al. Change in mental health after smoking cessation: systematic review and meta-analysis. *BMJ : British Medical Journal* 2014;348 doi: 10.1136/bmj.g1151
6. Booker CL, Skew AJ, Sacker A, et al. Well-Being in Adolescence—An Association With Health-Related Behaviors: Findings From Understanding Society, the UK Household Longitudinal Study. *The Journal of Early Adolescence* 2014;34(4):518-38. doi: 10.1177/0272431613501082
7. Ussher MH, Owen CG, Cook DG, et al. The relationship between physical activity, sedentary behaviour and psychological wellbeing among adolescents. *Social Psychiatry and Psychiatric Epidemiology* 2007;42(10):851-56. doi: 10.1007/s00127-007-0232-x
8. Booker CL, Skew AJ, Kelly YJ, et al. Media Use, Sports Participation, and Well-Being in Adolescence: Cross-Sectional Findings From the UK Household Longitudinal Study. *American Journal of Public Health* 2015;105(1):173-79. doi: 10.2105/AJPH.2013.301783
9. Fuligni AJ, Hardway C. Daily Variation in Adolescents' Sleep, Activities, and Psychological Well-Being. *Journal of Research on Adolescence* 2006;16(3):353-78. doi: 10.1111/j.1532-7795.2006.00498.x
10. James S, Hale L. Sleep Duration and Child Wellbeing: A Nonlinear Association. *Journal of clinical child and adolescent psychology : the official journal for the Society of Clinical Child and Adolescent Psychology, American Psychological Association, Division 53* 2017;46(2):258-68. doi: 10.1080/15374416.2016.1204920
11. Rooney C, McKinley MC, Woodside JV. The potential role of fruit and vegetables in aspects of psychological well-being: a review of the literature and future directions. *Proceedings of the Nutrition Society* 2013;72(4):420-32. doi: 10.1017/S0029665113003388 [published Online First: 09/11]
12. Conner TS, Brookie KL, Carr AC, et al. Let them eat fruit! The effect of fruit and vegetable consumption on psychological well-being in young adults: A randomized controlled trial. *PLoS ONE* 2017;12(2):e0171206. doi: 10.1371/journal.pone.0171206
13. Lien L. Is breakfast consumption related to mental distress and academic performance in adolescents? *Public Health Nutrition* 2007;10(4):422-28. doi: 10.1017/S1368980007258550 [published Online First: 04/01]
14. Hoare E, Milton K, Foster C, et al. The associations between sedentary behaviour and mental health among adolescents: a systematic review. *International Journal of Behavioral Nutrition and Physical Activity* 2016;13(1):108. doi: 10.1186/s12966-016-0432-4
15. Przybylski AK, Weinstein N. A Large-Scale Test of the Goldilocks Hypothesis: Quantifying the Relations Between Digital-Screen Use and the Mental Well-Being of Adolescents. *Psychological Science* 2017;28(2):204-15. doi: 10.1177/0956797616678438

- 1  
2  
3 16. Hamer M, Yates T, Sherar LB, et al. Association of after school sedentary behaviour in adolescence with mental wellbeing in adulthood. *Preventive*  
4 *Medicine* 2016;87(Supplement C):6-10. doi: <https://doi.org/10.1016/j.ypmed.2016.02.021>  
5  
6 17. Trainor S, Delfabbro P, Anderson S, et al. Leisure activities and adolescent psychological well-being. *Journal of Adolescence* 2010;33(1):173-86. doi:  
7 <https://doi.org/10.1016/j.adolescence.2009.03.013>  
8  
9 18. Landstedt E, Persson S. Bullying, cyberbullying, and mental health in young people. *Scandinavian journal of public health* 2014;42(4):393-9. doi:  
10 10.1177/1403494814525004 [published Online First: 2014/03/13]  
11  
12 19. Przybylski AK, Bowes L. Cyberbullying and adolescent well-being in England: a population-based cross-sectional study. *The Lancet Child & Adolescent*  
13 *Health* 2017;1(1):19-26. doi: 10.1016/S2352-4642(17)30011-1  
14  
15  
16  
17  
18  
19  
20  
21  
22  
23  
24  
25  
26  
27  
28  
29  
30  
31  
32  
33  
34  
35  
36  
37  
38  
39  
40  
41  
42  
43  
44  
45  
46

**BMJ Paediatrics Open****The Impact of Health Behaviours and Deprivation on Wellbeing in a National Sample of English Young People**

|                               |                                                                                                                                                                                                                                                                                                              |
|-------------------------------|--------------------------------------------------------------------------------------------------------------------------------------------------------------------------------------------------------------------------------------------------------------------------------------------------------------|
| Journal:                      | <i>BMJ Paediatrics Open</i>                                                                                                                                                                                                                                                                                  |
| Manuscript ID                 | bmjpo-2018-000335.R2                                                                                                                                                                                                                                                                                         |
| Article Type:                 | Original article                                                                                                                                                                                                                                                                                             |
| Date Submitted by the Author: | 06-Aug-2018                                                                                                                                                                                                                                                                                                  |
| Complete List of Authors:     | Gireesh, Aswathikutty; University College London, Institute of Child Health<br>Das, Shikta; University College London, Institute of Cardiovascular<br>Science, MRC Unit for Lifelong Health and Ageing<br>Viner, Russell; UCL Institute of Child Health, Population, Policy & Practice<br>Research Programme |
| Keywords:                     | Adolescent Health, Sleep, Nutrition                                                                                                                                                                                                                                                                          |
|                               |                                                                                                                                                                                                                                                                                                              |

SCHOLARONE™  
Manuscripts

Review Only

**TITLE**

1  
2 The Impact of Health Behaviours and Deprivation on Wellbeing in a National Sample of  
3  
4 English Young People  
5  
6  
7

8  
9 Aswathikutty Gireesh MSc. <sup>a\*</sup>

10  
11 Shikta Das PhD <sup>a\*</sup>

12  
13  
14 Prof. Russell Viner M.B.B.S., PhD <sup>b</sup>

15  
16  
17 \*Joint first authors  
18

19  
20 <sup>a</sup> UCL Great Ormond Street Institute of Child Health, Population, Policy and Practice  
21  
22 Programme, 30 Guilford Street, London WC1N 1EH, United Kingdom  
23

24  
25 <sup>b</sup> UCL Institute of Cardiovascular Science, MRC Unit for Lifelong Health and Ageing at  
26  
27 UCL  
28

29  
30 Address for correspondence:  
31

32  
33 Aswathikutty Gireesh  
34

35  
36 Great Ormond Street Institute of Child Health, Population, Policy and Practice Programme.  
37  
38 30, Guilford Street, London WC1N 1EH, UK.  
39

40  
41 Email address: [a.aswathikutty-gireesh@ucl.ac.uk](mailto:a.aswathikutty-gireesh@ucl.ac.uk)  
42  
43  
44

45 **Word count:** 2574  
46  
47  
48  
49  
50  
51  
52  
53  
54  
55  
56  
57  
58  
59  
60



**ABSTRACT**

1  
2 **Objective:** To determine the modifiable factors influencing wellbeing in boys and girls by  
3  
4 accounting for deprivation, ethnicity and clustering within local authorities.  
5  
6

7 **Methods:** We used data from a very large nationally-representative survey, the What About  
8  
9 Youth (WAY) study involving 120,115 adolescents aged 15 years. Our outcome measure of  
10  
11 mental wellbeing was the Warwick-Edinburgh Mental Wellbeing Scale (WEMWBS).  
12  
13 Potential explanatory factors included substance abuse, screen time, eating habits, reading,  
14  
15 bullying, sleeping pattern, physical activity and area-level deprivation. We ran unadjusted  
16  
17 and adjusted multilevel models for each explanatory factor, after adjusting for ethnicity,  
18  
19 deprivation and including a random effect for the local authority.  
20  
21  
22

23 **Results:** Boys had a higher overall mean WEMWBS score than girls ( $p < 0.0001$ ). In the  
24  
25 adjusted model, each of multiple risk behaviours, eating habits, sleep, bullying, physical  
26  
27 activity, screen-time and reading were independently associated with mental wellbeing in  
28  
29 both boy and girls ( $P < 0.0001$  for both). Sleep and eating behaviours had a stronger effect in  
30  
31 both sexes than bullying, physical activity and screen time.  
32  
33

34 **Conclusion:** The largest contributors to adolescent wellbeing appear to be sleep, eating  
35  
36 behaviours and bullying when considered in a multivariable framework. Future longitudinal  
37  
38 studies and health policies need to consider a range of behavioural factors to drive improve  
39  
40 improvements in adolescent wellbeing.  
41  
42  
43  
44  
45  
46  
47  
48  
49  
50  
51  
52  
53  
54  
55  
56  
57  
58  
59  
60

## INTRODUCTION

1  
2 There are growing concerns about the wellbeing of young people in modern societies  
3  
4 particularly in the UK where there is evidence that young people's wellbeing is lower than in  
5  
6 many comparable developed countries <sup>1 2</sup>.  
7

8  
9 Wellbeing is defined as “the state of being comfortable, healthy or happy” <sup>3</sup>. From a holistic  
10  
11 perspective, wellbeing incorporates different dimensions of adolescent lives including social  
12  
13 relationships as well as individual functioning <sup>4</sup>. However, the determinants of adolescent  
14  
15 wellbeing is a relatively understudied area in comparison with the large literature on factors  
16  
17 associated with mental health problems, as wellbeing concept has only been on greater focus  
18  
19 over the past two decades <sup>5 6</sup>.  
20  
21

22  
23 A wide range of factors have been shown to be related to adolescent wellbeing, including a  
24  
25 range cognitive and relational factors such as bullying <sup>7</sup>, family structure and relationships <sup>8</sup>,  
26  
27 peer support <sup>9</sup> and school connectedness <sup>10</sup>. Other behaviours also influence wellbeing,  
28  
29 including substance use (alcohol, drugs and smoking habits) <sup>11-13</sup>, fruit and vegetable  
30  
31 consumption <sup>14</sup>, breakfast consumption <sup>15</sup>, physical activity <sup>16</sup>, sleep duration <sup>17</sup>, sedentary  
32  
33 behaviour <sup>7 18</sup> and leisure time activities <sup>19</sup>. However, published studies use a wide range of  
34  
35 wellbeing measures, resulting in conflicting findings <sup>20 21</sup>. Furthermore, studies have largely  
36  
37 focused on single risk factors and not explored how factors including behavioural factors  
38  
39 interact to influence wellbeing. Additionally, given that many such behaviours are strongly  
40  
41 socially patterned, studies have thus far paid little attention to confounding by socioeconomic  
42  
43 position and issues relating to the clustering of behaviours and wellbeing within localities.  
44  
45

46  
47 Policy initiatives to improve wellbeing amongst young people have largely focussed upon  
48  
49 cognitive and psychological factors related to resilience to adversity, and have paid little  
50  
51 attention to the contribution of non-psychological modifiable factors, such as other lifestyle  
52  
53 behaviours. Understanding the potential contribution of modifiable behavioural factors to  
54  
55 adolescent wellbeing may inform different strategies to improve young people's wellbeing.  
56  
57

1 We used a very large recent nationally-representative and population-based survey of English  
2 15 year-olds to examine the contribution of individual-level modifiable behaviours to  
3 wellbeing, including potentially protective (sleep, reading, and physical activity) and risk  
4 behaviours (substance use, unhealthy eating habits and excessive screen time). Our objective  
5 was to identify modifiable behavioural factors for mental wellbeing in boys and girls using an  
6 adolescent-specific measure and accounting for deprivation, ethnicity and clustering within  
7 local authorities (LAs).  
8  
9  
10  
11  
12  
13  
14  
15  
16  
17

## 18 **METHODS**

### 19 **Study design and sample**

20  
21  
22  
23 The What About Youth study (WAY) is a large-scale youth-oriented survey funded  
24 by the Department of Health (DH) in England and carried out by NHS Digital in 2014<sup>22</sup>. The  
25 primary aim of the survey was to collect robust local authority level data on youth health  
26 behaviours and general health to improve their health outcomes. Study participants were  
27 those who turned 15 years old in the academic year 2013/14. A random sampling  
28 methodology was employed to draw 298,080 participants from the National Pupil Database.  
29 The sample size was calculated to attain 1000 young people in each of 152 LAs in England; 2  
30 LAs were merged with their nearest neighbours due to small size.  
31  
32  
33  
34  
35  
36  
37  
38  
39  
40

41 The achieved sample was 120,115 individuals, of whom 16% responded online and 84% via  
42 postal means (2,835 opted out). The response rates differed by gender, with adjusted response  
43 rates of 35% in boys and 49% in girls, and by deprivation, ethnicity and LA. Non-response  
44 weights using these factors were calculated to provide alignment between the achieved and  
45 target samples<sup>22</sup>. We obtained a fully anonymised cohort data electronically from the United  
46 Kingdom (UK) Data Service website<sup>22</sup>. The National Children's Bureau (NBC) carried out a  
47 detailed ethical review of the original study, but it was not required for this secondary data  
48 analysis.  
49  
50  
51  
52  
53  
54  
55  
56  
57  
58  
59  
60

## Outcome variable

1  
2 Mental wellbeing was measured using the Warwick-Edinburgh Mental Wellbeing  
3 Scale (WEMWBS) <sup>23</sup>, a population-level wellbeing measure. It is validated to use in  
4 adolescents' aged 13 or more and focus primarily on positive aspects of mental wellbeing  
5  
6 (Internal consistency,  $\alpha=0.90$ ). Participants indicate how often they feel like each of the 14  
7 items using a 5-point scale that ranges from 5 "all the time" to 1 "none of the time" <sup>24</sup>. Total  
8 scores ranged from 14-70 and were calculated by summing each participant's responses. The  
9 potential explanatory behavioural variables were identified from the literature review of  
10 previous publication. A detail description of each variable is given in Appendix A.  
11  
12  
13  
14  
15  
16  
17  
18  
19  
20  
21

22 A composite variable for risk behaviour index for substance use was constructed by the  
23 summation of three dichotomous risk behaviour variables: (a) Smoking: If currently smokes  
24 (b) Drinking alcohol: If drinks once a month or more frequently (c) Cannabis use: If ever  
25 tried cannabis. Based on the number of risk behaviours, we categorised it from "none" to  
26 "three". Similarly, composite unhealthy eating habit index was derived from (a) Skipping  
27 Breakfast: If avoided breakfast in last 7 days (b) Poor diet: If consumed less than 5 portions  
28 of fruits and vegetables a day (c) Takeaway food: If consumed takeaway food in past 7 days.  
29 Based on a combination of unhealthy behaviours, the composite score was categorised into  
30 0= none, 1= only one, 2 =any two and 3 =all three. Physical active for 60+ minutes for at  
31 least 5 days were classified as "physically active" and the rest "physically inactive." This  
32 threshold was defined in line with government recommendations <sup>25 26</sup>, except for the intensity  
33 of exercise which was not available in the dataset. The selected threshold was taken at five  
34 days a week, as only 13% reported being physically active for seven days a week. A digital  
35 screen time variable was computed based on reported weekend and weekday usage of  
36 television, internet, smartphone and computer games. Subjects were categorised into  
37 "≥7hrs/day", "About 5-6 hours/day", "About 3 -4 hours/day", "About 2 hrs/day" and  
38 "≤1hrs/day". Time spent reading on weekends and weekdays had response options ranging  
39  
40  
41  
42  
43  
44  
45  
46  
47  
48  
49  
50  
51  
52  
53  
54  
55  
56  
57  
58  
59  
60

1 from none to seven hours per day. Based on the distribution of data, we recoded the variable  
2 as “none”, “about half an hour/day”, “about 1 hour/day” and “2 hours /day”. The frequency of  
3 eight hours sleep in the last seven days was coded as “every day”, “most days”, “some days”  
4 and “not in the past 7 days”. Bullying was measured with Olweus Bully/Victim  
5 Questionnaire, a reliable 8-item scale used to assess the bullying victimisation<sup>27</sup>. We  
6 combined responses to create one overall measure of bullying experience (yes/no). In line  
7 with a previous study<sup>28</sup>, adolescents who were bullied more than “two or three times a  
8 month” were categorised as bullying victims.

9  
10  
11  
12  
13  
14  
15  
16  
17  
18  
19 Ethnicity, deprivation and mode of questionnaire completion were selected as confounders in  
20 the relationship between wellbeing and potential explanatory variables as shown in previous  
21 studies<sup>7</sup>. Ethnicity was self-identified by participants’ and was an adaptation of the 2001 UK  
22 census categories, supplemented by questions on the national group. English Index of  
23 Multiple Deprivation (IMD) was used as a measure of relative deprivation for small areas<sup>29</sup>.  
24  
25  
26  
27  
28  
29  
30  
31  
32  
33  
34  
35  
36  
37  
38  
39  
40  
41  
42  
43  
44  
45  
46  
47  
48  
49  
50  
51  
52  
53  
54  
55  
56  
57  
58  
59  
60  
IMD scores were divided into three deprivation categories as defined by quintiles of the  
national distribution: 1 and 2 (high deprivation), 3 (average), 4 and 5 (low). Participants were  
allowed to choose between online or postal modes of questionnaire completion.

## Analyses

We conducted unadjusted and adjusted multilevel regression, in Stata 14 (Stata Corp, College Station, TX). For wellbeing scores, the interaction between gender and health behaviours was statistically significant ( $p < 0.001$ ) and therefore, analyses were stratified by gender. All variables were plotted to check the distribution and normality was checked with the Kolmogorov-Smirnov (K-S) test. All estimates were weighted by representativeness of participants to compensate for the disproportionate selection of sample and non-response bias. Pearson  $\chi^2$  tests were used to compare differences in the distribution of explanatory variables by gender. An unadjusted analysis was run to test the association between each

independent variable (substance use, unhealthy eating habits, screen time, reading, bullying, physical activity and sleeping hours) and the outcome adolescent wellbeing (Model 1). The analyses were repeated in a multivariable analysis where ethnicity, mode of questionnaire delivery and IMD were added as confounders between each risk factor and outcome (Model 2). In model 3, all explanatory factors and covariates were included simultaneously to obtain associations between each variable and wellbeing scores after adjusting for confounders and other explanatory variables. LAs were treated as random effects in all models. Models were also tested for significant quadratic terms signifying curvilinear relationships; this was only significant for reading. The intraclass correlations coefficient (ICC), being the proportion of total variance attributable to differences at the LA level, was estimated using multilevel models for wellbeing with adjustment for IMD, ethnicity and mode of completion.

## Results

In total, 57,153 boys (47.82%) and 62,962 girls (52.18%) participated in the study (Table A1). Of these, boys had higher average wellbeing score in comparison to girls. The intraclass correlation coefficient (ICC) for the wellbeing score was 0.032 for girls and 0.024 for boys in the adjusted model, suggesting that variance in adolescent wellbeing is small at LA level.

Table A1 shows that there were significant differences in the distribution of potential explanatory variables between boys and girls. Girls had higher risk factors such as substance use, unhealthy eating habits, screen time and reported more bullying than boys. Protective variables such as sleeping hours (more than 8 hours) and reading were also significantly higher in girls than in boys.

**Table A1. Descriptive statistics for well-being scores and explanatory variables under study, by gender**

|  | Total |   | Boys          |   | Girls         |         |  |
|--|-------|---|---------------|---|---------------|---------|--|
|  | N     | N | Mean (SD) / % | N | Mean (SD) / % | P value |  |

|                                            | 120,115 | 57,153  | 47.58%    | 62,962 | 52.42%    |         |
|--------------------------------------------|---------|---------|-----------|--------|-----------|---------|
| <b>WEMWBS Scores<sup>a</sup></b>           | 117,842 | 56,352  | 47.82%    | 61,490 | 52.18%    | <0.0001 |
| Mean (SD)                                  |         |         | 50 (8.60) |        | 45 (9.66) |         |
| <b>Substance use<sup>b</sup></b>           | 71,133  | 32,516  | 45.71%    | 38617  | 54.29%    | <0.0001 |
| None                                       |         | 17,133  | 52.69     | 19932  | 51.61     |         |
| One                                        |         | 10,783  | 33.16     | 12150  | 31.46     |         |
| Two                                        |         | 3,010   | 9.26      | 3,785  | 9.8       |         |
| Three                                      |         | 1,590   | 4.89      | 2,750  | 7.12      |         |
| <b>Unhealthy Eating Habits<sup>c</sup></b> | 115918  | 55,289  | 47.70%    | 60,629 | 52.30%    | <0.0001 |
| None                                       |         | 12,081  | 21.85     | 11,951 | 19.71     |         |
| One                                        |         | 20,287  | 36.69     | 20,389 | 33.63     |         |
| Two                                        |         | 16,373  | 29.61     | 19,064 | 31.44     |         |
| Three                                      |         | 6,548   | 11.84     | 9,225  | 15.22     |         |
| <b>Sleeping hours (&gt;8 hrs)</b>          | 117,516 | 56, 207 | 47.83%    | 61307  | 52.17%    | <0.0001 |
| Not in the past 7 days                     |         | 3676    | 6.54      | 6922   | 11.29     |         |
| some days                                  |         | 11051   | 19.66     | 16051  | 26.18     |         |
| most days                                  |         | 20, 121 | 35.8      | 20928  | 34.14     |         |
| everyday                                   |         | 21, 361 | 38        | 17406  | 28.39     |         |
| <b>Bullying</b>                            | 117,744 | 56,309  | 47.82%    | 61,435 | 52.18%    | <0.0001 |
| No                                         |         | 45,959  | 81.62     | 45,094 | 73.40     |         |
| yes                                        |         | 10,350  | 18.38     | 16,341 | 26.60     |         |
| <b>Physical activity</b>                   | 118450  | 56,674  | 47.85     | 61776  | 52.15     | <0.0001 |
| Physically active                          |         | 48,172  | 85        | 44,348 | 71.79     |         |
| Inactive                                   |         | 8,502   | 15        | 17,428 | 28.21     |         |
| <b>Screen time</b>                         | 118,845 | 56,892  | 47.87     | 61,943 | 52.13%    | <0.0001 |
| About 2 hrs/day                            |         | 3,609   | 6.34      | 3,469  | 5.6       |         |
| ≤1hrs/day                                  |         | 912     | 1.6       | 929    | 1.5       |         |
| About 3 -4 hours/day                       |         | 18,621  | 32.73     | 17,311 | 27.95     |         |
| About 5-6 hours/day                        |         | 17,198  | 30.23     | 17,850 | 28.82     |         |
| ≥7hrs/day                                  |         | 16,559  | 29.1      | 22387  | 36.14     |         |
| <b>Reading</b>                             | 118,140 | 56,513  | 47.84     | 61,627 | 52.16     | <0.0001 |
| None                                       |         | 14,278  | 25.26     | 9,875  | 16.02     |         |
| About Half an hour/day                     |         | 17,572  | 31.09     | 15,363 | 24.93     |         |
| About 1 hr/day                             |         | 12,505  | 22.13     | 13,442 | 21.81     |         |

<sup>a</sup> WEMWBS : Warwick-Edinburgh Mental Wellbeing score

<sup>b</sup> Risk behaviours include smoking, drinking and cannabis use

<sup>c</sup> Unhealthy eating habits include skipping breakfast, not having 5 portions of fruits and vegetables and consumption of takeaway food.

All explanatory variables and IMD were significantly associated with wellbeing in both sexes (Table A2). Wellbeing in both sexes decreased with use of substance use, unhealthy eating habits, bullying, physical activity and longer screen time in both sexes. Protective factors,

such as, sleeping more than eight hours and reading more than two hours were associated with higher wellbeing in both sexes.

**Table A2: Univariate analysis between well-being and explanatory variables, by gender**

|                                   | MODEL <sup>1</sup> |               |           |               |
|-----------------------------------|--------------------|---------------|-----------|---------------|
|                                   | Boys               |               | Girls     |               |
|                                   | <i>B</i>           | 95 % CI       | <i>B</i>  | 95 % CI       |
| <b>Substance Use</b>              |                    |               |           |               |
| None                              | Reference          |               | Reference |               |
| One                               | -0.34*             | [-0.56,-0.13] | -1.48**   | [-1.70,-1.27] |
| Two                               | -2.19**            | [-2.60,-1.78] | -4.96**   | [-5.35,-4.57] |
| Three                             | -3.56**            | [-4.16,-2.95] | -5.89**   | [-6.47,-5.30] |
| <b>Unhealthy Eating Habits</b>    |                    |               |           |               |
| None                              | Reference          |               | Reference |               |
| One                               | -1.65**            | [-1.88,-1.43] | -2.63**   | [-2.91,-2.34] |
| Two                               | -3.36**            | [-3.60,-3.12] | -4.85**   | [-5.13,-4.58] |
| Three                             | -5.00**            | [-5.39,-4.61] | -6.49**   | [-6.83,-6.14] |
| <b>Sleeping hours (&gt;8 hrs)</b> |                    |               |           |               |
| Not in the past 7 days            | Reference          |               | Reference |               |
| some days                         | 2.99**             | [2.51,3.47]   | 4.71**    | [4.39,5.04]   |
| most days                         | 5.59**             | [5.15,6.03]   | 8.39**    | [8.06,8.72]   |
| everyday                          | 7.49**             | [7.07,7.87]   | 10.70**   | [10.35,11.06] |
| <b>Bullying</b>                   |                    |               |           |               |
| No                                | Reference          |               | Reference |               |
| Yes                               | -4.70**            | [-3.59,-3.31] | -5.84**   | [-5.25,-4.90] |
| <b>Physical activity</b>          |                    |               |           |               |
| Physically active                 | Reference          |               | Reference |               |
| Inactive                          | -3.85**            | [-4.11,-3.61] | -2.77**   | [-3.04,-2.51] |
| <b>Screen time</b>                |                    |               |           |               |
| About 2 hrs/day                   | Reference          |               | Reference |               |
| ≤1hrs/day                         | 0.07               | [-0.59, 0.73] | 0.08      | [-0.69, 0.85] |
| About 3 -4 hours/day              | -1.22**            | [-1.60,-0.84] | -1.27**   | [-1.71,-0.83] |
| About 5-6 hours/day               | -2.17**            | [-2.51,-1.83] | -3.06**   | [-3.52,-2.60] |
| ≥= 7 hours / day                  | -3.72**            | [-4.12,-3.32] | -5.38**   | [-5.80,-4.97] |
| <b>Reading</b>                    |                    |               |           |               |
| None                              | Reference          |               | Reference |               |
| About Half an hour/day            | 1.61**             | [1.41,1.82]   | 2.17**    | [1.88,2.46]   |
| About 1 hr/day                    | 2.25**             | [2.06,2.44]   | 2.54**    | [2.26,2.82]   |
| ≥2hrs/day                         | 2.27***            | [2.01,2.52]   | 2.35**    | [2.05,2.66]   |
| <b>IMD Scores</b>                 |                    |               |           |               |
| High deprivation                  | Reference          |               | Reference |               |
| Average deprivation               | 0.57**             | [0.31,0.81]   | 0.35**    | [0.10,0.59]   |



|                   |           |               |           |               |
|-------------------|-----------|---------------|-----------|---------------|
| Least deprivation | 1.05**    | [0.87,1.21]   | 1.16**    | [0.92,1.40]   |
| <b>Ethnicity</b>  |           |               |           |               |
| White             | Reference |               | Reference |               |
| Mixed             | 0.18      | [-0.29,0.65]  | -0.44*    | [-0.82,-0.06] |
| Asian             | -0.54*    | [-0.85,-0.23] | 0.98**    | [0.59,1.38]   |
| Black             | 0.91**    | [0.42,1.39]   | 1.10**    | [0.67,1.52]   |
| Other             | -0.45*    | [-0.84,-0.04] | 0.30      | [-0.09,0.70]  |

<sup>1</sup>Unadjusted model taking into account clustering at Local Authority Level, Multilevel models fitted with weighted design weights, Quadratic function added to reading.

\*\* p<0.001, \* p<0.05

In the multivariable models adjusted for covariates (Table A3), poorer wellbeing was associated with multiple substances use and multiple unhealthy eating habits in a dose-dependent fashion. Being physically inactive, longer screen time and experiencing bullying were both associated with decrements in wellbeing in both sexes, with the association being stronger in girls than in boys.

**Table A3: Gender - stratified partially-adjusted and fully-adjusted multilevel modelling for well-being and explanatory variables**

| Variables                         | Boys               |               |                    |               | Girls              |               |                    |               |
|-----------------------------------|--------------------|---------------|--------------------|---------------|--------------------|---------------|--------------------|---------------|
|                                   | MODEL <sup>2</sup> |               | MODEL <sup>3</sup> |               | MODEL <sup>2</sup> |               | MODEL <sup>3</sup> |               |
|                                   | B                  | 95 % CI       | B                  | 95 % CI       | B                  | 95 % CI       | B                  | 95 % CI       |
| <b>Substance use</b>              |                    |               |                    |               |                    |               |                    |               |
| None                              | Reference          |               | Reference          |               | Reference          |               | Reference          |               |
| One                               | -0.40**            | [-0.61,-0.18] | -0.14              | [-0.36,0.08]  | -1.51**            | [-1.73,-1.30] | -0.77**            | [-0.97,-0.57] |
| Two                               | -2.16**            | [-2.57,-1.75] | -1.05**            | [-1.42,-0.67] | -4.84**            | [-5.22,-4.46] | -2.67**            | [-3.01,-2.33] |
| Three                             | -3.50**            | [-4.11,-2.88] | -1.63**            | [-2.16,-1.09] | -5.80**            | [-6.36,-5.23] | -2.79**            | [-3.35,-2.24] |
| <b>Eating Habits</b>              |                    |               |                    |               |                    |               |                    |               |
| None                              | Reference          |               | Reference          |               | Reference          |               | Reference          |               |
| One                               | -1.63**            | [-1.85,-1.41] | -0.89**            | [-1.18,-0.60] | -2.63**            | [-2.92,-2.34] | -1.37**            | [-1.69,-1.06] |
| Two                               | -3.31**            | [-3.55,-3.08] | -1.84**            | [-2.14,-1.54] | -4.84**            | [-5.12,-4.55] | -2.29**            | [-2.64,-1.96] |
| Three                             | -4.95**            | [-5.34,-4.56] | -2.44**            | [-2.82,-2.06] | -6.46**            | [-6.79,-6.10] | -2.61**            | [-3.04,-2.18] |
| <b>Sleeping hours (&gt;8 hrs)</b> |                    |               |                    |               |                    |               |                    |               |
| Not in the past 7 days            | Reference          |               | Reference          |               | Reference          |               | Reference          |               |
| some days                         | 2.98**             | [2.50,3.45]   | 2.69**             | [2.10,3.28]   | 4.69**             | [4.36,5.01]   | 3.71**             | [3.34,4.08]   |
| most days                         | 5.55**             | [5.11,5.99]   | 4.30**             | [3.78,4.82]   | 8.35**             | [8.01,8.69]   | 6.64**             | [6.28,7.00]   |
| everyday                          | 7.45**             | [7.03,7.86]   | 5.79**             | [5.29,6.28]   | 10.65**            | [10.29,11.01] | 8.16**             | [7.72,8.60]   |
| <b>Bullying</b>                   |                    |               |                    |               |                    |               |                    |               |
| No                                | Reference          |               | Reference          |               | Reference          |               | Reference          |               |
| Yes                               | -4.64**            | [-4.86,-4.42] | -3.78**            | [-4.09,-3.48] | -5.77**            | [-5.98,-5.56] | -4.01**            | [-4.23,-3.78] |
| <b>Physical activity</b>          |                    |               |                    |               |                    |               |                    |               |
| Physically active                 | Reference          |               | Reference          |               | Reference          |               | Reference          |               |
| Inactive                          | -3.78**            | [-4.02,-3.55] | -2.63**            | [-2.95,-2.30] | -2.77**            | [-3.04,-2.50] | -1.70**            | [-2.01,-1.39] |
| <b>Screen time</b>                |                    |               |                    |               |                    |               |                    |               |
| About 2 hrs/day                   | Reference          |               | Reference          |               | Reference          |               | Reference          |               |
| ≤1hrs/day                         | 0.09               | [-0.57,0.75]  | 0.34               | [-0.58,1.26]  | 0.09               | [-0.69,0.87]  | -0.38              | [-1.49,0.72]  |
| About 3 -4 hours/day              | -1.22**            | [-1.60,-0.83] | -0.61*             | [-0.99,-0.23] | -1.26**            | [-1.70,-0.83] | -0.54              | [-1.14,0.05]  |
| About 5-6 hours/day               | -2.15**            | [-2.50,-1.81] | -0.82**            | [-1.27,-0.37] | -3.04**            | [-3.49,-2.58] | -1.21**            | [-1.75,-0.67] |
| ≥= 7 hours / day                  | -3.67**            | [-4.06,-3.27] | -1.20**            | [-1.65,-0.75] | -5.32**            | [-5.73,-4.90] | -1.81**            | [-2.29,-1.33] |

| <b>Reading</b>                        |           |             |           |              |           |             |           |              |  |
|---------------------------------------|-----------|-------------|-----------|--------------|-----------|-------------|-----------|--------------|--|
| None                                  | Reference |             | Reference |              | Reference |             | Reference |              |  |
| About Half an hour/day                | 1.59**    | [1.38,1.80] | 0.57**    | [0.26,0.88]  | 2.13**    | [1.84,2.42] | 0.56**    | [0.23,0.90]  |  |
| About 1 hr/day                        | 2.24**    | [2.04,2.43] | 1.04**    | [0.79,1.29]  | 2.51**    | [2.24,2.78] | 0.60**    | [0.26,0.93]  |  |
| ≥2hrs/day                             | 2.28**    | [2.05,2.54] | 0.90**    | [0.55,1.25]  | 2.34**    | [2.03,2.64] | 0.33*     | [0.02,0.64]  |  |
| <b>IMD Scores</b>                     |           |             |           |              |           |             |           |              |  |
| High deprivation                      | --        | --          | Reference |              | --        | --          | Reference |              |  |
| Average deprivation                   | --        | --          | -0.12     | [-0.38,0.14] | --        | --          | 0.16      | [-0.16,0.49] |  |
| Least deprivation                     | --        | --          | 0.17      | [-0.06,0.40] | --        | --          | 0.36*     | [0.06,0.66]  |  |
| <b>Ethnicity</b>                      |           |             |           |              |           |             |           |              |  |
| White                                 | --        | --          | Reference |              | --        | --          | Reference |              |  |
| Mixed                                 | --        | --          | -0.06     | [0.81,-0.59] | --        | --          | 0.44      | [-0.08,0.96] |  |
| Asian                                 | --        | --          | -0.09     | [0.81,-0.84] | --        | --          | 0.35      | [-0.53,1.23] |  |
| Black                                 | --        | --          | 0.99*     | [0.01,0.25]  | --        | --          | 1.75**    | [1.20,2.31]  |  |
| Other                                 | --        | --          | -0.59     | [0.02,-1.09] | --        | --          | -0.19     | [-0.88,0.49] |  |
| <b>Mode of questionnaire delivery</b> |           |             |           |              |           |             |           |              |  |
| Online                                | --        | --          |           |              | --        | --          |           |              |  |
| paper                                 | --        | --          | 0.24      | [-0.03,0.51] | --        | --          | 1.26**    | [0.99,1.53]  |  |

<sup>2</sup> Each predictor variable adjusted for ethnicity, mode of questionnaire delivery and Index of multiple deprivation

<sup>3</sup> All Variables mutually adjusted for each other

Note: Multilevel models fitted with weighted design weights, Quadratic function added to reading.

\*\* p<0.001, \* p<0.05

Higher wellbeing was associated with number of days young people achieved more than eight hours of sleep again in a dose-dependent fashion. Habitual reading most days was associated with higher wellbeing although there was no evidence of a dose-response above 30 minutes per day in the fully adjusted model (Figure 1). Adolescents from black ethnic groups had higher wellbeing scores overall. Area deprivation did not affect male wellbeing but had a small effect on female wellbeing.

## Discussion

This study broadens our understanding of risk and protective factors associated with wellbeing in adolescence, using a very large nationally representative survey to examine a wide spectrum of behavioural and psychosocial factors relating to youth wellbeing and taking into account deprivation and clustering at LA level. The study shows that young people who reported lower levels of wellbeing were more likely to have engaged in multiple unhealthy eating habits and substance use; be victims of bullying; have exercised insufficiently; have exceeded recommended screen time use. These findings were robust to mutual adjustment for all variables and for deprivation, ethnicity, and mode of questionnaire delivery. A dose-response pattern was also observed between wellbeing and health behaviours such as substance use, unhealthy eating habits and sleeping pattern. A decrease in the number of risk behaviours and an increase in the number of days slept for more than eight hours, corresponded with an increase in average levels of wellbeing. The impact of deprivation on wellbeing was surprisingly small, as was LA locality variance, suggesting that variance in wellbeing lies largely in behavioural and psychological factors.

Since different studies have used different variables to define various aspects of wellbeing in the analyses, comparison with other studies is difficult. We found boys reported higher mean wellbeing than girls, consistent with national reports for England<sup>30,31</sup>, but in contrast to findings from recent Health Survey England (HSE) 2015, where only slight gender variations were observed<sup>32</sup>. The proportions reporting each of the behaviours were broadly similar to those found in other recent national surveys<sup>31,33,34</sup>. Girls reported higher levels of risky

1 health behaviours including current smoking, alcohol consumption, bullying, lower levels of  
2 physical activity, on the other hand, boys were more likely to report higher levels of physical  
3 activity and these were consistent with findings from the HBSC England<sup>33</sup>.  
4

5  
6 These findings corroborate with two previous studies where happiness as a marker of  
7 wellbeing was found to be positively associated with multiple health protective behaviours  
8 (sport's participation and healthier eating ) and negatively associated with multiple risk  
9 behaviours (smoking, alcohol use and heavy screen use) in adolescents<sup>35 36</sup>. Our finding that  
10 substance use was associated with lower wellbeing is similar to that seen in other studies, as  
11 were our findings for being bullied<sup>7</sup>. The association of sleep duration and reading with  
12 wellbeing in young people has been little studied. Leisure time and adequate sleep have been  
13 identified as being associated with wellbeing<sup>17 19</sup>, however ours is the first to examine these  
14 alongside other behavioural and psychological factors.  
15  
16  
17  
18  
19  
20  
21  
22  
23  
24  
25  
26  
27

28 We found an association between deprivation and lower wellbeing, although in contrast to  
29 previous studies<sup>37</sup> the effect size was small and we found no association in boys. This may  
30 reflect the lack of adjustment for multiple behaviours, ethnicity and area effects in other  
31 studies. Our finding suggests that much of what has previously been understood, as unhealthy  
32 behaviours themselves associated with deprivation may mediate deprivation effects. We  
33 found that young people from black ethnic groups reported significantly higher wellbeing in  
34 both sexes, consistent with previous UK findings<sup>38</sup>. However, the reasons for this remain  
35 unclear and require further study. We found this association to be robust to adjustment for  
36 deprivation and all significant behavioural and psychological factors, suggesting this likely  
37 relates to factors not measured in our study.  
38  
39  
40  
41  
42  
43  
44  
45  
46  
47  
48  
49  
50  
51

52 We used a large, nationally representative sample of ethnically and socioeconomically  
53 diverse adolescents. Prior studies have examined very few health behaviours and relied on  
54 proxy measures of wellbeing rather than on population-level wellbeing measures that tap into  
55  
56  
57  
58  
59  
60

1 both feelings and psychological flourishing. In our study, associations between wellbeing and  
2 behavioural factors were examined within a multivariable and multilevel framework, using a  
3 validated wellbeing scale with robust psychometric properties.  
4

5  
6 Our findings are subject to a number of limitations. Our data were cross-sectional and thus  
7 the direction of causality is unclear for the behavioural variables. Participant responses could  
8 be influenced by social desirability, and those with poor wellbeing may be inclined towards  
9 endorsing questions more than others, thus introducing bias. The direction of such biases is  
10 unclear, however, we note that girls (who had a higher response rate in the overall survey)  
11 reported higher levels of both more risky and protective behaviours than boys, potentially  
12 reflecting social desirability biases. All variables used were self-reported except for area-  
13 level deprivation. We have also repeated analysis excluding the outliers and that did not  
14 materially affect the findings. We used bullying victimization as a proxy for psychological  
15 problems due to the lack of more appropriate variables in the dataset; thus it is possible that  
16 some of the associations seen here result from inadequate adjustment for psychological  
17 issues. We combined variables across domains into composite variables; this may have  
18 introduced bias although the direction of bias is unclear.  
19  
20  
21  
22  
23  
24  
25  
26  
27  
28  
29  
30  
31  
32  
33

### 34 35 36 37 38 **Conclusion**

39  
40  
41 Our findings suggest that promoting healthy sleep, reading, and healthy eating  
42 behaviours may present important policy targets for enhancing adolescent wellbeing in  
43 addition to more accepted foci on physical activity, screen time and bullying. While there  
44 was an association between deprivation and wellbeing, the effect size was small. Future work  
45 is needed to examine these modifiable factors within a longitudinal causal framework.  
46  
47  
48  
49  
50  
51  
52  
53  
54  
55  
56  
57  
58  
59  
60

**What is already known on this topic?**

Young people's wellbeing may be affected by multiple individual and contextual factors.

Key determinants of adolescent wellbeing remain unclear.

Few studies have examined a wide range of potential determinants whilst adjusting for area-level deprivation.

**What this study adds?**

Findings support current policy foci on bullying, physical activity and screen-time as correlates of wellbeing amongst young people.

Sleep and eating behaviours may also be important policy targets for promoting adolescent wellbeing.

A coherent policy framework to promote adolescent wellbeing needs to be multifaceted and consider a range of health factors in young people's lives

## **Funding Sources**

This report is independent research commissioned and funded by the National Institute for Health Research Policy Research Programme. The views expressed in this publication are those of the author(s) and not necessarily those of the NHS, the National Institute for Health Research, the Department of Health or its arm's length bodies, and other Government Departments.

## **Conflicts of interests**

The authors have no conflicts of interest to disclose

## **Contributors**

AG & SD led the writing of the study and undertook the analyses. RV conceptualised the project, contributed to the ideas underlying the article, contributed to writing and revision of the article.

## **Acknowledgement**

Preliminary findings of this paper were presented at the Adolescent Lives and Wellbeing 2017 Conference organised by University College London.



## References

1. Patton GC, Sawyer SM, Santelli JS, et al. Our future: a Lancet commission on adolescent health and wellbeing. *Lancet (London, England)* 2016;387(10036):2423-78. doi: 10.1016/s0140-6736(16)00579-1 [published Online First: 2016/05/14]
2. RCPCH. State of Child Health Report Royal College of Paediatrics and Child Health; 2017 [Available from: <http://www.thehealthwell.info/node/1062390> accessed 6th November 2017.
3. Oxford University Press. Oxford Dictionary. Oxford: Oxford University Press 2016.
4. Žukauskienė R. Adolescence and Well-Being. In: Ben-Arieh A, Casas F, Frønes I, et al., eds. Handbook of Child Well-Being: Theories, Methods and Policies in Global Perspective. Dordrecht: Springer Netherlands 2014:1713-38.
5. Das JK, Salam RA, Lassi ZS, et al. Interventions for Adolescent Mental Health: An Overview of Systematic Reviews. *Journal of Adolescent Health* 2016;59(4, Supplement):S49-S60. doi: <https://doi.org/10.1016/j.jadohealth.2016.06.020>
6. Keyes CL. Promoting and protecting mental health as flourishing: a complementary strategy for improving national mental health. *The American psychologist* 2007;62(2):95-108. doi: 10.1037/0003-066x.62.2.95 [published Online First: 2007/02/28]
7. Przybylski AK, Bowes L. Cyberbullying and adolescent well-being in England: a population-based cross-sectional study. *The Lancet Child & Adolescent Health* 2017;1(1):19-26. doi: 10.1016/S2352-4642(17)30011-1
8. Dinisman T, Andresen S, Montserrat C, et al. Family structure and family relationship from the child well-being perspective: Findings from comparative analysis. *Children and Youth Services Review* 2017;80(Supplement C):105-15. doi: <https://doi.org/10.1016/j.childyouth.2017.06.064>
9. Raja SN, McGee R, Stanton WR. Perceived attachments to parents and peers and psychological well-being in adolescence. *Journal of Youth and Adolescence* 1992;21(4):471-85. doi: 10.1007/bf01537898
10. García Bacete FJ, Marande Perrin G, Schneider BH, et al. Effects of School on the Well-Being of Children and Adolescents. In: Ben-Arieh A, Casas F, Frønes I, et al., eds. Handbook of Child Well-Being:

Theories, Methods and Policies in Global Perspective. Dordrecht: Springer Netherlands 2014:1251-

305.

11. Taylor G, McNeill A, Girling A, et al. Change in mental health after smoking cessation: systematic review and meta-analysis. *BMJ : British Medical Journal* 2014;348 doi: 10.1136/bmj.g1151
12. Farmer S, Hanratty B. The relationship between subjective wellbeing, low income and substance use among schoolchildren in the north west of England: a cross-sectional study. *Journal of Public Health* 2012;34(4):512-22. doi: 10.1093/pubmed/fds022
13. Phillips-Howard PA, Bellis MA, Briant LB, et al. Wellbeing, alcohol use and sexual activity in young teenagers: findings from a cross-sectional survey in school children in North West England. *Substance abuse treatment, prevention, and policy* 2010;5:27. doi: 10.1186/1747-597x-5-27 [published Online First: 2010/11/12]
14. Conner TS, Brookie KL, Carr AC, et al. Let them eat fruit! The effect of fruit and vegetable consumption on psychological well-being in young adults: A randomized controlled trial. *PLoS ONE* 2017;12(2):e0171206. doi: 10.1371/journal.pone.0171206
15. Lien L. Is breakfast consumption related to mental distress and academic performance in adolescents? *Public Health Nutrition* 2007;10(4):422-28. doi: 10.1017/S1368980007258550 [published Online First: 04/01]
16. Ussher MH, Owen CG, Cook DG, et al. The relationship between physical activity, sedentary behaviour and psychological wellbeing among adolescents. *Social Psychiatry and Psychiatric Epidemiology* 2007;42(10):851-56. doi: 10.1007/s00127-007-0232-x
17. Fuligni AJ, Hardway C. Daily Variation in Adolescents' Sleep, Activities, and Psychological Well-Being. *Journal of Research on Adolescence* 2006;16(3):353-78. doi: 10.1111/j.1532-7795.2006.00498.x
18. Hamer M, Yates T, Sherar LB, et al. Association of after school sedentary behaviour in adolescence with mental wellbeing in adulthood. *Preventive Medicine* 2016;87(Supplement C):6-10. doi: <https://doi.org/10.1016/j.ypmed.2016.02.021>
19. Trainor S, Delfabbro P, Anderson S, et al. Leisure activities and adolescent psychological well-being. *Journal of Adolescence* 2010;33(1):173-86. doi: <https://doi.org/10.1016/j.adolescence.2009.03.013>

20. Pollard EL, Lee PD. Child Well-being: A Systematic Review of the Literature. *Social Indicators Research* 2003;61(1):59-78. doi: 10.1023/a:1021284215801
21. Rose T, Joe S, Williams A, et al. Measuring Mental Wellbeing Among Adolescents: A Systematic Review of Instruments. *Journal of Child and Family Studies* 2017;26(9):2349-62. doi: 10.1007/s10826-017-0754-0
22. Health and Social Care Information Centre. What About YOUth? Survey. England: UK Data Service, 2016.
23. Tennant R, Hiller L, Fishwick R, et al. The Warwick-Edinburgh Mental Well-being Scale (WEMWBS): development and UK validation. *Health and Quality of Life Outcomes* 2007;5:63-63. doi: 10.1186/1477-7525-5-63
24. Taggart F, Stewart-Brown S, Parkinson J. Warwick-Edinburgh Mental Well-being Scale (WEMWBS) Scotland: NHS Health Scotland; 2015 [Available from: <http://www.healthscotland.com/uploads/documents/26787-WEMWBS%20User%20Guide%20Version%202%20May%202015.pdf> accessed 19th October 2017.
25. Morgan K, Hallingberg B, Littlecott H, et al. Predictors of physical activity and sedentary behaviours among 11-16 year olds: Multilevel analysis of the 2013 Health Behaviour in School-aged Children (HBSC) study in Wales. *BMC Public Health* 2016;16:569. doi: 10.1186/s12889-016-3213-8
26. Booth ML, Okely AD, Chey T, et al. The reliability and validity of the physical activity questions in the WHO health behaviour in schoolchildren (HBSC) survey: a population study. *British journal of sports medicine* 2001;35(4):263-7. [published Online First: 2001/07/31]
27. Olweus D. The Revised Olweus Bully/Victim Questionnaire. University of Bergen: Research Center for Health Promotion (HEMIL Center) 1996.
28. Cook CR, Williams KR, Guerra NG, et al. Predictors of bullying and victimization in childhood and adolescence: A meta-analytic investigation. *School Psychology Quarterly* 2010;25(2):65-83. doi: 10.1037/a0020149
29. Department for Communities and Local Government. The English indices of deprivation London2015 [Available from:

[https://www.gov.uk/government/uploads/system/uploads/attachment\\_data/file/465791/English\\_Indices\\_of\\_Deprivation\\_2015\\_-\\_Statistical\\_Release.pdf](https://www.gov.uk/government/uploads/system/uploads/attachment_data/file/465791/English_Indices_of_Deprivation_2015_-_Statistical_Release.pdf)

30. Office of National Statistics. Measuring National Well-being: Insights into children's mental health and well-being. England, 2015.
31. Office of National Statistics. Young people's well-being England: Office for National Statistics; 2017 [Available from: <https://www.ons.gov.uk/peoplepopulationandcommunity/wellbeing/articles/youngpeopleswellbeingandpersonalfinance/2017> accessed 10th November 2017.
32. Fuller E, Morris S. Health Survey for England. London NHS Digital, 2015.
33. Currie C, Griebler R, Inchley J. Health Behaviour in School-Aged Children (HBSC) Study Protocol: Background, Methodology and Mandatory Items for the 2009/10 Survey. Edinburgh: CAHRU 2010.
34. Brooks F, Magnusson J, Klemra E, et al. Health Behaviours of School-Aged Children (HBSC) 2013-2014 England 2014 [Available from: [www.hbscengland.com](http://www.hbscengland.com)].
35. Booker CL, Skew AJ, Sacker A, et al. Well-Being in Adolescence—An Association With Health-Related Behaviors: Findings From Understanding Society, the UK Household Longitudinal Study. *The Journal of Early Adolescence* 2014;34(4):518-38. doi: 10.1177/0272431613501082
36. Booker CL, Skew AJ, Kelly YJ, et al. Media Use, Sports Participation, and Well-Being in Adolescence: Cross-Sectional Findings From the UK Household Longitudinal Study. *American Journal of Public Health* 2015;105(1):173-79. doi: 10.2105/AJPH.2013.301783
37. Candace Currie, Cara Zanotti, Antony Morgan, et al. Social determinants of health and well-being among young people. International report from the 2009/2010 survey. Health Behavior in school-age children (HBSC) study. Denmark: WHO Regional Office for Europe, 2012:252.
38. Patalay P, Fitzsimons E. Correlates of Mental Illness and Wellbeing in Children: Are They the Same? Results From the UK Millennium Cohort Study. *Journal of the American Academy of Child & Adolescent Psychiatry* 2016;55(9):771-83. doi: 10.1016/j.jaac.2016.05.019

Confidential: For Review Only

1  
2  
3  
4  
5  
6  
7  
8  
9  
10  
11  
12  
13  
14  
15  
16  
17  
18  
19  
20  
21  
22  
23  
24  
25  
26  
27  
28  
29  
30  
31  
32  
33  
34  
35  
36  
37  
38  
39  
40  
41  
42  
43  
44  
45  
46  
47  
48  
49  
50  
51  
52  
53  
54  
55  
56  
57  
58  
59  
60

1  
2  
3  
4  
5  
6  
7  
8  
9  
10  
11  
12  
13  
14  
15  
16  
17  
18  
19  
20  
21  
22  
23  
24  
25  
26  
27  
28  
29  
30  
31  
32  
33  
34  
35  
36  
37  
38  
39  
40  
41  
42  
43  
44  
45  
46  
47  
48  
49  
50  
51  
52  
53  
54  
55  
56  
57  
58  
59  
60

Figure 1

Relationship between wellbeing and health behaviours: (A) Risk Factors (B) Protective Factors

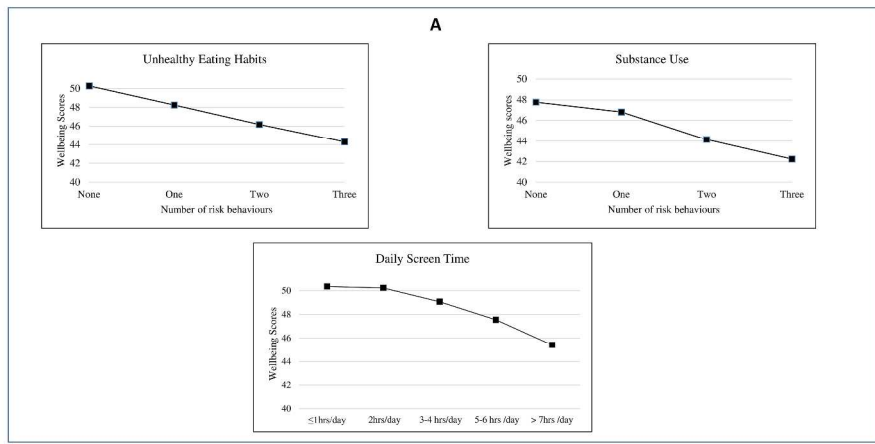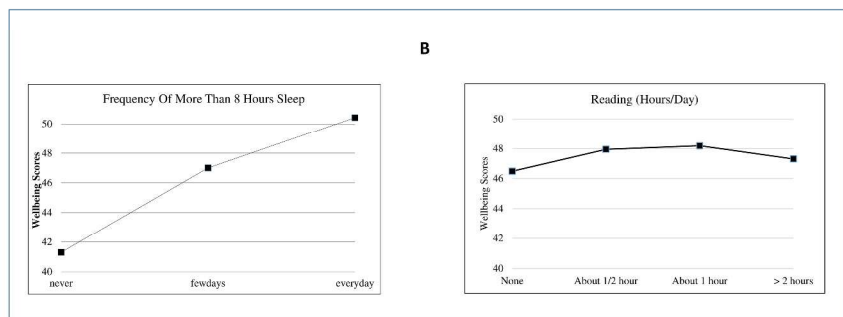

Only

## APPENDIX A

### (i) VARIABLE DESCRIPTION

| Composite variables                      | Original variables                                                                                                                                                                                                                                                                                                       | Variable labels               | Composite variables                                                                                                                                                                                                                                                                                                                                                                                                                                                                                                                                                                                                                                                                                                                                                                                                                                                                                                                                                    |
|------------------------------------------|--------------------------------------------------------------------------------------------------------------------------------------------------------------------------------------------------------------------------------------------------------------------------------------------------------------------------|-------------------------------|------------------------------------------------------------------------------------------------------------------------------------------------------------------------------------------------------------------------------------------------------------------------------------------------------------------------------------------------------------------------------------------------------------------------------------------------------------------------------------------------------------------------------------------------------------------------------------------------------------------------------------------------------------------------------------------------------------------------------------------------------------------------------------------------------------------------------------------------------------------------------------------------------------------------------------------------------------------------|
| <b>Substance use risk</b> <sup>1-6</sup> | <b>Definitions were:</b><br>Smoking: Cigarette smoking status (currently smoke)<br>Drinking: Alcohol drinking status (Usually have an alcoholic drink once a month or more frequently)<br>Cannabis: Cannabis use status (Ever tried cannabis)                                                                            | SmkSt2<br>alcfrq1<br>Cantry   | <b>Alcohol + smoking + cannabis</b><br>(1) Smoking risk: If currently smokes (2) Drinking risk: If drinks once a month or more frequently (3) Cannabis risk: If ever tried cannabis. Each item was coded 0 for “no” and 1 for “yes”. The composite score obtained ranged from zero to three based on the number of risk behaviours; (0= None, 1= Only one, 2 =Any two and 3 =All three                                                                                                                                                                                                                                                                                                                                                                                                                                                                                                                                                                                 |
| <b>Physical Activity</b> <sup>7,8</sup>  | <b>Physical activity: in line with general recommendations</b><br>How many days physically active for 60+ minutes, in last 7 days ( Active for more than 5 days )<br>How often usually exercise in free time (Active for more than twice a week)<br>How many hours usually exercise in free (Active for an hour or more) | Physact<br>ExerOft<br>ExerHrs | <b>Duration of exercise + Frequency of exercise + Number of days met recommended guidelines</b><br>The first question on moderate to vigorous physical activity was “Over the past 7 days, on how many days you were physically active for a total of at least 60 minutes per day and responses ranged from 0 to 7. Second, the participants were asked “Outside school hours: how often do you usually exercise in your free time so much that you get out of breath or sweat?” with responses from less than a once a month to every day. The question on duration was “Outside school hours: how many hours do you usually exercise in your free time so much that you get out of breath or sweat?”, with responses from none to 7 or more hours. Adolescents who exercised for more than twice a week for an hour or more or were physically active for 60+ minutes for at least 5 days were classified as “physically active” and the rest “physically inactive”. |
| <b>Sleeping habits</b> <sup>9,10</sup>   | <b>Sleeping frequency in last week</b><br>How often slept 8+ hours per night in last 7 days                                                                                                                                                                                                                              | Sleep8pn                      | The question was “Over the past 7 days, how often did you sleep for 8 hours or more” and the responses were “every day”, “most days”, “some days” and “not in the past 7 days”.                                                                                                                                                                                                                                                                                                                                                                                                                                                                                                                                                                                                                                                                                                                                                                                        |

1  
2  
3  
4  
5  
6  
7  
8  
9  
10  
11  
12  
13  
14  
15  
16  
17  
18  
19  
20  
21  
22  
23  
24  
25  
26  
27  
28  
29  
30  
31  
32  
33  
34  
35  
36  
37  
38  
39  
40  
41  
42  
43  
44  
45  
46

**Eating Habits <sup>11-13</sup>**

**Definition of each unhealthy eating habits were:**

|                                                                                                               |          |
|---------------------------------------------------------------------------------------------------------------|----------|
| How often eaten take-away food in last 7 days (unhealthy habit if taken takeaway in past seven days)          | Eattake  |
| How often eaten breakfast in last 7 days (unhealthy habit if breakfast not taken regularly)                   | Eatbfst  |
| Consumed more than five portions of fruit and veg yesterday ( unhealthy habit if 5-A-DAY not taken regularly) | FV5ormor |

**Breakfast consumption + take away food + 5 A day**

(1) Skipping Breakfast: If avoided breakfast in last 7 days (2) Poor diet: If consumed less than 5 portions of fruits and vegetables a day (3) Takeaway food: If consumed takeaway food in past 7 days. Each item was coded 0 for “no” and 1 for “yes”. According to the number of unhealthy eating habits participant’s exhibited, a risk score from zero to three (0= None, 1= Only one, 2 =Any two and 3 =All three) was given

**Screen time <sup>8 14-16</sup>**

**Definitions of screen time derived as follows (Weekend and weekday hours combined)**

|                                                                 |                     |
|-----------------------------------------------------------------|---------------------|
| Hours per day watching TV                                       | Watchwk,<br>Watchwe |
| Hours per day spent playing computer games                      | Compwk ,<br>Compwe  |
| Hours per day spent on computers for communicating, or homework | Comphwk,<br>Comphwe |
| Hours per day spent on smart phone                              | Smartwk,<br>Smartwe |

**TV +\_computer games + internet**

FOR ALL, Response options for each item were ‘none at all’, ‘about half an hour a day’, ‘about 1 hour a day’, ‘about 2 hours a day’, ‘about 3 hours a day’, ‘about 4 hours a day’, ‘about 5 hours a day’, ‘about 6 hours a day’ and ‘about 7 or more hours a day’. The total screen time was calculated by grouping the similar options of each item and by combining both weekends and weekdays. Subjects were then categorised into “≥7hrs/day”, “About 5-6 hours/day”, “About 3 -4 hours/day”, “About 2 hrs/day” and “≤1hrs/day”.

**Reading <sup>17</sup>**

**Definitions of reading derived as follows:**

|                                                  |                   |
|--------------------------------------------------|-------------------|
| Hours per day spent reading outside school hours | Readwk,<br>Readwe |
|--------------------------------------------------|-------------------|

**Reading hours (Weekend + weekdays)**

“About how many hours a day do you usually spend sitting down reading books, magazines or newspapers (including e-readers, online newspapers, and magazines) and studying when you are not at school?”. The questions were asked for weekends and weekdays separately. The response options ranged from none to ≥ 7 hours per day

**Bullying <sup>18 19</sup>**

**Frequency with which the behaviour occurred over the past couple of months:**

**Traditional bullying (physical+ verbal + relational)**



|                                                                                                                  |          |
|------------------------------------------------------------------------------------------------------------------|----------|
| I was called mean names, was made fun of, or teased in a hurtful way                                             | Bllynam  |
| Other people left me out of things on purpose, excluded me from their group of friends, or completely ignored me | Blllyout |
| I was hit, kicked, pushed, shoved around, or locked indoors”                                                     | Blllyhit |
| Other people lied or spread rumours                                                                              | Blllylie |
| Made fun of me because of weight                                                                                 | Blllyfun |
| Sexual jokes/comments                                                                                            | Blllysex |

Bullying measure was meant to assess the extent to which they had recently experienced other children directing different types of bullying towards themselves. Six statements reflecting traditional bullying (physical, verbal, and relational) were asked. Questions were rated by participants using a 5-point response scale that ranged from 0=“I haven’t been bullied this way in the past couple of months” 1=“It has happened once or twice”, 2=“2 or 3 times a month”, 3=“2 or 3 times a week”, to 4=“Several times a week.”

## (ii) Individual Items and scoring of Warwick-Edinburgh Mental Well-being scale (WEMWBS)

|                                                        |                                                                                                                                                                                                                               |
|--------------------------------------------------------|-------------------------------------------------------------------------------------------------------------------------------------------------------------------------------------------------------------------------------|
| 1. I’ve been feeling optimistic about the future       | Each of the 14 item responses in WEMWBS are scored from 1 (none of the time), 2 (rarely), 3 (some of the time), 4 (often) to 5 (all of the time). A total scale score is calculated by summing the 14 individual item scores. |
| 2. I’ve been feeling useful                            |                                                                                                                                                                                                                               |
| 3. I’ve been feeling relaxed                           |                                                                                                                                                                                                                               |
| 4. I’ve been feeling interested in other people        |                                                                                                                                                                                                                               |
| 5. I’ve had energy to spare                            |                                                                                                                                                                                                                               |
| 6. I’ve been dealing with problems well                |                                                                                                                                                                                                                               |
| 7. I’ve been thinking clearly                          |                                                                                                                                                                                                                               |
| 8. I’ve been feeling good about myself                 |                                                                                                                                                                                                                               |
| 9. I’ve been feeling close to other people             |                                                                                                                                                                                                                               |
| 10. I’ve been feeling confident                        |                                                                                                                                                                                                                               |
| 11. I’ve been able to make up my own mind about things |                                                                                                                                                                                                                               |
| 12. I’ve been feeling loved                            |                                                                                                                                                                                                                               |
| 13. I’ve been interested in new things                 |                                                                                                                                                                                                                               |
| 14. I’ve been feeling cheerful                         |                                                                                                                                                                                                                               |

## REFERENCES

1. Farmer S, Hanratty B. The relationship between subjective wellbeing, low income and substance use among schoolchildren in the north west of England: a cross-sectional study. *Journal of Public Health* 2012;34(4):512-22. doi: 10.1093/pubmed/fds022
2. Phillips-Howard PA, Bellis MA, Briant LB, et al. Wellbeing, alcohol use and sexual activity in young teenagers: findings from a cross-sectional survey in school children in North West England. *Substance abuse treatment, prevention, and policy* 2010;5:27. doi: 10.1186/1747-597x-5-27 [published Online First: 2010/11/12]
3. Newcomb MD, Bentler PM, Collins C. Alcohol Use and Dissatisfaction with Self and Life: A Longitudinal Analysis of Young Adults. *Journal of Drug Issues* 1986;16(4):479-94. doi: 10.1177/002204268601600401
4. Bergman MM, Scott J. Young adolescents' wellbeing and health-risk behaviours: gender and socio-economic differences. *Journal of Adolescence* 2001;24(2):183-97. doi: <https://doi.org/10.1006/jado.2001.0378>
5. Taylor G, McNeill A, Girling A, et al. Change in mental health after smoking cessation: systematic review and meta-analysis. *BMJ : British Medical Journal* 2014;348 doi: 10.1136/bmj.g1151
6. Booker CL, Skew AJ, Sacker A, et al. Well-Being in Adolescence—An Association With Health-Related Behaviors: Findings From Understanding Society, the UK Household Longitudinal Study. *The Journal of Early Adolescence* 2014;34(4):518-38. doi: 10.1177/0272431613501082
7. Ussher MH, Owen CG, Cook DG, et al. The relationship between physical activity, sedentary behaviour and psychological wellbeing among adolescents. *Social Psychiatry and Psychiatric Epidemiology* 2007;42(10):851-56. doi: 10.1007/s00127-007-0232-x
8. Booker CL, Skew AJ, Kelly YJ, et al. Media Use, Sports Participation, and Well-Being in Adolescence: Cross-Sectional Findings From the UK Household Longitudinal Study. *American Journal of Public Health* 2015;105(1):177-9. doi: 10.2105/AJPH.2013.301783
9. Fuligni AJ, Hardway C. Daily Variation in Adolescents' Sleep, Activities, and Psychological Well-Being. *Journal of Research on Adolescence* 2006;16(3):353-78. doi: 10.1111/j.1532-7795.2006.00498.x
10. James S, Hale L. Sleep Duration and Child Wellbeing: A Nonlinear Association. *Journal of clinical child and adolescent psychology : the official journal for the Society of Clinical Child and Adolescent Psychology, American Psychological Association, Division 53* 2017;46(2):258-68. doi: 10.1080/15374416.2016.1204920
11. Rooney C, McKinley MC, Woodside JV. The potential role of fruit and vegetables in aspects of psychological well-being: a review of the literature and future directions. *Proceedings of the Nutrition Society* 2013;72(4):420-32. doi: 10.1017/S0029665113003388 [published Online First: 09/11]
12. Conner TS, Brookie KL, Carr AC, et al. Let them eat fruit! The effect of fruit and vegetable consumption on psychological well-being in young adults: A randomized controlled trial. *PLoS ONE* 2017;12(2):e0171206. doi: 10.1371/journal.pone.0171206
13. Lien L. Is breakfast consumption related to mental distress and academic performance in adolescents? *Public Health Nutrition* 2007;10(4):422-28. doi: 10.1017/S1368980007258550 [published Online First: 04/01]
14. Hoare E, Milton K, Foster C, et al. The associations between sedentary behaviour and mental health among adolescents: a systematic review. *International Journal of Behavioral Nutrition and Physical Activity* 2016;13(1):108. doi: 10.1186/s12966-016-0432-4
15. Przybylski AK, Weinstein N. A Large-Scale Test of the Goldilocks Hypothesis: Quantifying the Relations Between Digital-Screen Use and the Mental Well-Being of Adolescents. *Psychological Science* 2017;28(2):204-15. doi: 10.1177/0956797616678438

- 1
- 2
- 3
- 4 16. Hamer M, Yates T, Sherar LB, et al. Association of after school sedentary behaviour in adolescence with mental wellbeing in adulthood. *Preventive*
- 5 *Medicine* 2016;87(Supplement C):6-10. doi: <https://doi.org/10.1016/j.ypmed.2016.02.021>
- 6 17. Trainor S, Delfabbro P, Anderson S, et al. Leisure activities and adolescent psychological well-being. *Journal of Adolescence* 2010;33(1):173-86. doi:
- 7 <https://doi.org/10.1016/j.adolescence.2009.03.013>
- 8 18. Landstedt E, Persson S. Bullying, cyberbullying, and mental health in young people. *Scandinavian journal of public health* 2014;42(4):393-9. doi:
- 9 10.1177/1403494814525004 [published Online First: 2014/03/13]
- 10 19. Przybylski AK, Bowes L. Cyberbullying and adolescent well-being in England: a population-based cross-sectional study. *The Lancet Child & Adolescent*
- 11 *Health* 2017;1(1):19-26. doi: 10.1016/S2352-4642(17)30011-1
- 12
- 13
- 14
- 15
- 16
- 17
- 18
- 19
- 20
- 21
- 22
- 23
- 24
- 25
- 26
- 27
- 28
- 29
- 30
- 31
- 32
- 33
- 34
- 35
- 36
- 37
- 38
- 39
- 40
- 41
- 42
- 43
- 44
- 45
- 46

Confidential

|            |                                                                                                                                                |
|------------|------------------------------------------------------------------------------------------------------------------------------------------------|
|            |                                                                                                                                                |
|            |                                                                                                                                                |
| !          | " #                                                                                                                                            |
| \$ % ! & & | ' #                                                                                                                                            |
| ( ) * &    | + &, - &. !/0 1 !( # ) % , * (& % 2 &<br>, \$&. /0 1 !( # ) % , * ( % 1<br>\$ , (0 * ) * #2 & % # #<br>3 , /0() * (& % 2 &, 4 , 4 !54<br>& 4 # |
| 6!- %      | % 2 & \$ , 7                                                                                                                                   |
|            |                                                                                                                                                |

SCHOLARONE™  
 Manuscripts

Review Only

1  
2  
3  
4  
5  
6  
7  
8  
9  
10  
11  
12  
13  
14  
15  
16  
17  
18  
19  
20  
21  
22  
23  
24  
25  
26  
27  
28  
29  
30  
31  
32  
33  
34  
35  
36  
37  
38  
39  
40  
41  
42  
43  
44  
45  
46  
47  
48  
49  
50  
51  
52  
53  
54  
55  
56  
57  
58  
59  
60

! " # \$ % & ' ( ) \* + , - . / : ; < = > ? @ [ \ ] ^ \_ ` { | } ~

"

& ( ) %& & & \*

' +

, - \$ / - \* \* #

\* 01 \$ \* . -2 2 \* , 3

, - - \* % ( - , .

, -

4

! " # \$

\$ / - \* \* # &

01\* \$ \* . -2 2 \* ,3&

4 & ! " #5 6 & & "

4 789:

1  
2  
3  
4  
5  
6  
7  
8  
9  
10  
11  
12  
13  
14  
15  
16  
17  
18  
19  
20  
21  
22  
23  
24  
25  
26  
27  
28  
29  
30  
31  
32  
33  
34  
35  
36  
37  
38  
39  
40  
41  
42  
43  
44  
45  
46  
47  
48  
49  
50  
51  
52  
53  
54  
55  
56  
57  
58  
59  
60

4 ! # #

\* # ! &

# #5 #\*

; < # 271\*228 28 # & /

! ! ! "5 % ; % <&

= # \* \* \* \*

# \* \* # # 5 & >

> = # \* > #\*

#&

4 # % ; ?1&1112<&

> \* " \* \* \* # \* #

#\* 5 ! # ! !

# ; ?1&1112 <&

= # \* # # & "

# ! = & ! !

! # ! &

! \*

# ! ! "&

" ! \*

! ! & @

! &

Confidential: For Review Only

1  
2  
3  
4  
5  
6  
7  
8  
9  
10  
11  
12  
13  
14  
15  
16  
17  
18  
19  
20  
21  
22  
23  
24  
25  
26  
27  
28  
29  
30  
31  
32  
33  
34  
35  
36  
37  
38  
39  
40  
41  
42  
43  
44  
45  
46  
47  
48  
49  
50  
51  
52  
53  
54  
55  
56  
57  
58  
59  
60

! ! #

# ,3! # A ! !

# 27&

B \* # #C 0& @

\* !

! & ! \*

! # !

! \* ! #

! 8D&

! ! ! \*

# 9\* # E\*

F 21& / ! \*

; \* " < 2252Q

2:\* " 28\* # # 2D\* 29\* #

9 2E 2F& ! \* !

! \* 71 72& @ \* #

" = !

! & #\* # #

# \* #

! ! &

# ! # #

# #\* #

5 # \* #

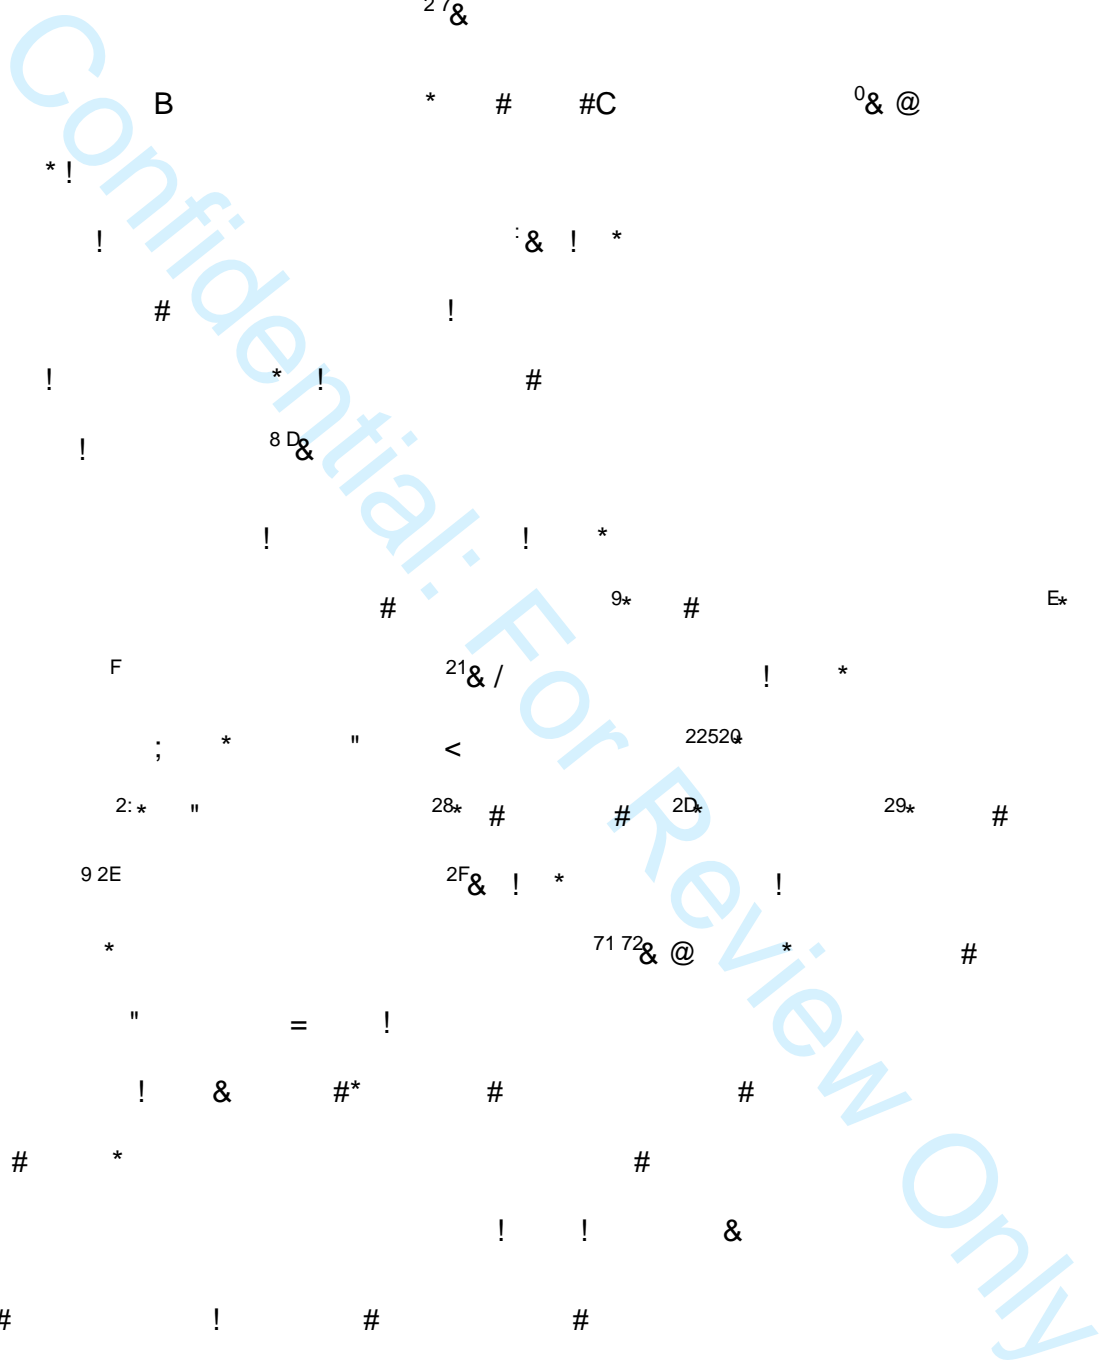

1  
2  
3  
4  
5  
6  
7  
8  
9  
10  
11  
12  
13  
14  
15  
16  
17  
18  
19  
20  
21  
22  
23  
24  
25  
26  
27  
28  
29  
30  
31  
32  
33  
34  
35  
36  
37  
38  
39  
40  
41  
42  
43  
44  
45  
46  
47  
48  
49  
50  
51  
52  
53  
54  
55  
56  
57  
58  
59  
60

& ,  
 ! # # A ! &  
 # #5 5 #  
 28 # 5 = 5  
 ! \* # ; \* \* # #< "  
 ; \* # = <& / >  
 ! # ! #  
 5 \* # !  
 ;. <&  
 !  
 " # \$ %&  
 # ; < 5 # 5 #  
 # ; < # 712: 77&  
 # # ! # #  
 & # !  
 ! 28 # # 7120G2:&  
 # ! # !7FE\*1E1 &  
 H ! 2111 # 287 . 17  
 . ! ! H &  
 ! 271\*228 \* ! 2DJ E:J  
 ;7\*E08 <& # \* ! >  
 08J # :FJ \* # \* # .& 5  
 ! ! !  
 77& # # # ,

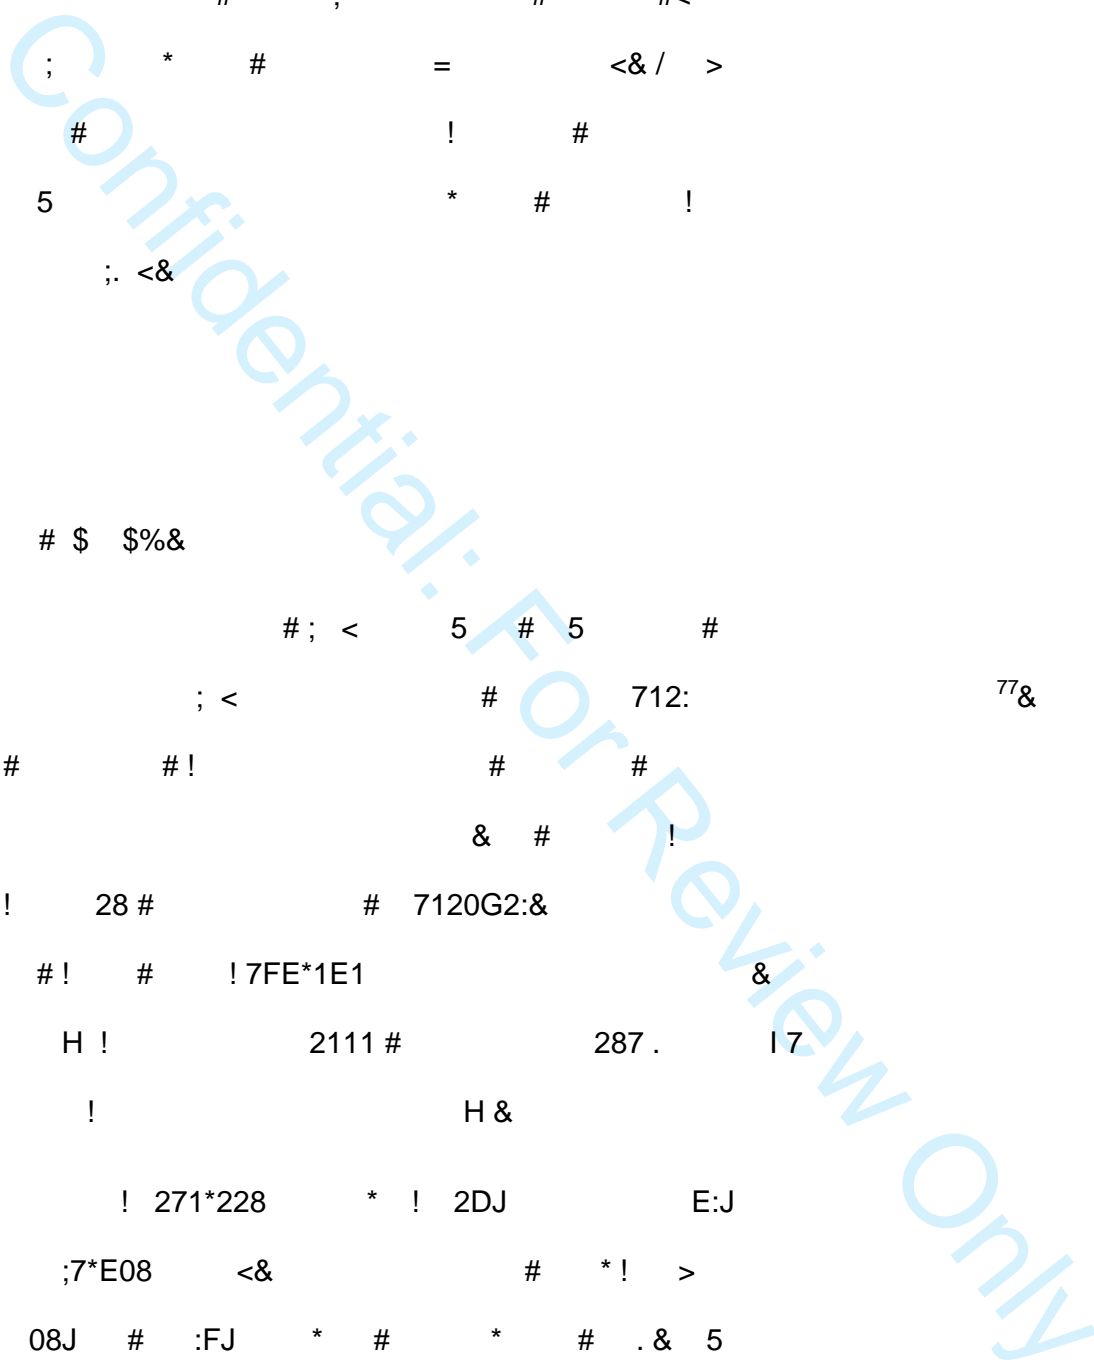



1  
2  
3  
4  
5  
6  
7  
8  
9  
10  
11  
12  
13  
14  
15  
16  
17  
18  
19  
20  
21  
22  
23  
24  
25  
26  
27  
28  
29  
30  
31  
32  
33  
34  
35  
36  
37  
38  
39  
40  
41  
42  
43  
44  
45  
46  
47  
48  
49  
50  
51  
52  
53  
54  
55  
56  
57  
58  
59  
60

3 ;,3< ! 77& - K ; -<

! #\* ! L #

# &

% \$ \$

% ! ! ! "5 %

; % < 70\* 5 ! &

K 20 # !

; #\* MN1&F1 & ! # " 2:

85 8 B C 2 B C 7:&

2:591 ! # K &

= # ! !

& = &

" = ! #

" 4 ;< " 4 # "

;< " 4 " L # ;< - 4

& " \*! B C

B C& #\* # =! ;< "

" 4 " 9 # ;< 4 8

# ;< " !# 4 " !# 9 # &

# \* !

1N \* 2N # \* 7 N # ! 0 N & # D10

8 # ! B # # C B # # &C

! ! 78 7D = #

= ! ! & ! "

# ! "\*" # 20J # # # ! "&

1  
2  
3  
4  
5  
6  
7  
8  
9  
10  
11  
12  
13  
14  
15  
16  
17  
18  
19  
20  
21  
22  
23  
24  
25  
26  
27  
28  
29  
30  
31  
32  
33  
34  
35  
36  
37  
38  
39  
40  
41  
42  
43  
44  
45  
46  
47  
48  
49  
50  
51  
52  
53  
54  
55  
56  
57  
58  
59  
60

! " ! " #

\* \* & > !

BP9 G #C\* B 85D G #C\* B 0 5: G #C\* B 7 G #C

BQ2 G #C& ! " ! " #

#& \*!

B C\* G #C\* B 2 G #C B7 G #C& L #

# ! B # #C\* B # C\* B # C

B 9 #C& # ! ! /! #G)

R \* E5 # <sup>79</sup>&

# = ;# G <&

! # <sup>7E</sup>\* ! ! B!

C! # &

#\* L !

! ! = # !

<sup>9</sup>& #! 5 # K ! 7112 ,3

\* # L & =

% ;% <! <sup>7F</sup>&

% ! # L

4 2 7 ; <\* 0 ; <\* : 8 ; !<& !

! ! L &

\$ "

> > \* 2 ;

- \* - \* S<& @ ! \* !

! # ; ?1&112< \* # ! #

& ! " #! " !

1  
2  
3  
4  
5  
6  
7  
8  
9  
10  
11  
12  
13  
14  
15  
16  
17  
18  
19  
20  
21  
22  
23  
24  
25  
26  
27  
28  
29  
30  
31  
32  
33  
34  
35  
36  
37  
38  
39  
40  
41  
42  
43  
44  
45  
46  
47  
48  
49  
50  
51  
52  
53  
54  
55  
56  
57  
58  
59  
60

3 5 ;35 < & ! ! #

5

& 7 ! = #

# & > # ! !

; \* # \* \* \* # \*

# # < ! ;% 2<&

# ! # ! #\* L

# % ! ! " ;%

7<& 0\* = # ! #

! ! ! >

= # & . ! & % !

L # | ! #

& ;--<\*

. \*!

! ! > % \* # &

\* 89\*280 # ;:9&E7J< D7\*FD7 ;87&2EJ< #

; 2<& / \* # ! &

;--< ! ! 1&107

1&17: # > \* !

. &

2 ! !

= # ! # & \$ "

\* # \* # # &

; E < ! #

# &

\$ '( & \$ ) \* + # \$ ,&\$ \$ " \$ \$ "- "#

1  
2  
3  
4  
5  
6  
7  
8  
9  
10  
11  
12  
13  
14  
15  
16  
17  
18  
19  
20  
21  
22  
23  
24  
25  
26  
27  
28  
29  
30  
31  
32  
33  
34  
35  
36  
37  
38  
39  
40  
41  
42  
43  
44  
45  
46  
47  
48  
49  
50  
51  
52  
53  
54  
55  
56  
57  
58  
59  
60

|                | '45-'6  | 67-'68  | 97(6:2    | ;4-<;4 | 64(942    |         |
|----------------|---------|---------|-----------|--------|-----------|---------|
| \$             | 229*E:7 | 8D*087  | :9&E7J    | D2*:F1 | 87&2EJ    | ?1&1112 |
| % ; <          |         |         | 81 ;E&D1< |        | :8 ;F&DD< |         |
| \$             | 92*200  | 07*82D  | :8&92J    | 0ED29  | 8:&7FJ    | ?1&1112 |
|                |         | 29*200  | 87&DF     | 2FF07  | 82&D2     |         |
| /              |         | 21*9E   | 00&2      | 27281  | 02&:I     |         |
| !              |         | 0*121   | F&7D      | 0*9E8  | F&E       |         |
|                |         | 2*8F    | :&E       | 7*98   | 9&2       |         |
| \$ " \$ # ! \$ | 228F2I  | 88*7E   | :9&91J    | D1*D7  | 87&01.    | ?1&111  |
|                |         | 27*1E2  | 72&E8     | 22*F82 | 2F&92     |         |
| /              |         | 71*7E   | 0D&I      | 71*0E  | 00&C      |         |
| !              |         | 2D*090  | 7F&D2     | 2F*1D: | 02&::     |         |
|                |         | D*8:E   | 22&E      | F*77I  | 28&7      |         |
| & # /=: 0      | 229*82I | 8D* 71  | :9&E0J    | D20I   | 87&29.    | ?1&111  |
| 9 #            |         | 0D9I    | D&8       | DF7    | 22&7      |         |
| #              |         | 22182   | 2F&C      | 2D18:  | 7D&2      |         |
| #              |         | 71* 272 | 08&E      | 71F7E  | 0:&2:     |         |
| # #            |         | 72* 0D  | 0E        | 29:1D  | 7E&C      |         |
| " #            | 229*9:: | 8D*01F  | :9&E7J    | D2*:08 | 87&2EJ    | ?1&1112 |
|                |         | :8*F8F  | E2&I      | :8*1F: | 90&:      |         |
| #              |         | 21*081  | 2E&0E     | 2D*0:2 | 7D&D1     |         |
| 3 " \$ \$ "    | 22E:81  | 8D*D9:  | :9&E8     | D299D  | 87&28     | ?1&1112 |
| # #            |         | :E*297  | E8        | ::*0:E | 92&9F     |         |
|                |         | E*817   | 28        | 29*:7E | 7E&72     |         |
| %              | 22E*E:} | 8D*EF   | :9&E!     | D2*F:( | 87&20.    | ?1&111  |
| 7 G #          |         | 0*D1F   | D&0:      | 0*:DF  | 8&D       |         |
| Q2 G #         |         | F27     | 2&        | F7F    | 2&        |         |
| 05: G #        |         | 2E*D72  | 07&90     | 29*022 | 79&F8     |         |
| 8 5D G #       |         | 29*2FI  | 01&7      | 29*E8  | 7E&E      |         |
| P9 G #         |         | 2D*88F  | 7F&2      | 770E9  | 0D&2:     |         |
| \$ #           | 22E*2:1 | 8D*82   | :9&E:     | D2*D7  | 87&2      | ?1&111  |
|                |         | 2:*79E  | 78&7D     | F*E98  | 2D&17     |         |
| G #            |         | 29*897  | 02&1F     | 28*0D0 | 7:&F0     |         |
| 2 G #          |         | 27*81I  | 77&2      | 20*::7 | 72&E      |         |

! #! \$! %  
& ' (( ) % ! # (! ! !)) # ! \$( ! !) ')!!\*

= # % ! # ! ! =

1 ; 7<& = ! \* #

2

3 \* # \* # # = & \*

4

5 \*

6 ! !

7

8 ! ! = &

9

10

11 \$ 4 \$ \$ \$ \$ " \* \* + # \$ , & \$ \$ " \$ \$ - " #

---

"

---

<6 2 <6 2

\$

( (

19 / 51&0:' T51&8D\*51&20U 52&:E" T52&91\*52&79U

20 ! 57&2F" T57&D1\*52&9EU 5:&FD" T58&08\*5:&89U

21 50&8D" T5:&2D\*57&F8U 58&EF" T5D&:9\*58&01U

22

23 \$ " \$ # !\$

24

25 ( (

26 / 52&D8" T52&EE\*52&:0U 57&D0" T57&F2\*57&0:U

27 ! 50&0D" T50&D1\*50&27U 5:&E8" T58&20\*5:&8EU

28 58&11" T58&0F\*5:&D2U 5D&:F" T5D&E0\*5D&2:U

29

30 & # /=: 0

31 9 #

32 ( (

33 # 7&FF" T7&82\*0&:9U :&92" T:&0F\*8&1:U

34 # 8&8F" T8&28\*D&10U E&0F" TE&1D\*E&97U

35 # # 9&:F" T9&19\*9&E9U 21&91" T21&08\*22&1DU

36 " #

37

38 ( (

39 5:&91" T50&8F\*50&02U 58&E:" T58&78\*5:&F1U

40

41 3" \$ \$ "

42 # #

43 ( (

44 50&E8" T5:&22\*50&D2U 57&99" T50&1:\*57&82U

45 %

46 7 G #

47 ( (

48 Q2 G # 1&19 T51&8F\* 1&90U 1&1E T51&DF\* 1&E8U

49 05: G # 52&77" T52&D1\*51&E:U 52&79" T52&92\*51&E0U

50 85D G # 57&29" T57&82\*52&E0U 50&1D" T50&87\*57&D1U

51 VN 9 G # 50&97" T5:&27\*50&07U 58&0E" T58&E1\*5:&F9U

52 \$ #

53

54 ( (

55 G # 2&D2" T2&:2\*2&E7U 7&29" T2&EE\*7&:DU

+

1  
2  
3  
4  
5  
6  
7  
8  
9  
10  
11  
12  
13  
14  
15  
16  
17  
18  
19  
20  
21  
22  
23  
24  
25  
26  
27  
28  
29  
30  
31  
32  
33  
34  
35  
36  
37  
38  
39  
40  
41  
42  
43  
44  
45  
46  
47  
48  
49  
50  
51  
52  
53  
54  
55  
56  
57  
58  
59  
60

|        |        |               |        |               |
|--------|--------|---------------|--------|---------------|
| 2 G #  | 7&78"  | T7&1D*7&::U   | 7&8:"  | T7&7D*7&E7U   |
| P7 G # | 7&79"  | T7&12*7&87U   | 7&08"  | T7&18*7&DDU   |
|        | (      |               | (      |               |
|        | 1&89"  | T1&02*1&E2U   | 1&08"  | T1&21*1&8FU   |
| .      | 2&18"  | T1&E9*2&72U   | 2&2D"  | T1&F7*2&:1U   |
| "      |        |               |        |               |
|        | (      |               | (      |               |
| % =    | 1&2E   | T51&7F*1&D8U  | 51&::' | T51&E7*51&1DU |
|        | 51&8:' | T51&E8*51&70U | 1&FE"  | T1&8F*2&0EU   |
| "      | 1&F2"  | T1&:7*2&0FU   | 2&21"  | T1&D9*2&87U   |
| /      | 51&:8' | T51&E:*51&1:U | 1&01   | T51&1F*1&91U  |

2, > " & # . \* % ! ! ! \* R

" ?1&112\* ' ?1&18

> ; 0<\* ! !  
! # 5  
& # # \* = #  
! ! ! = \* !  
# &

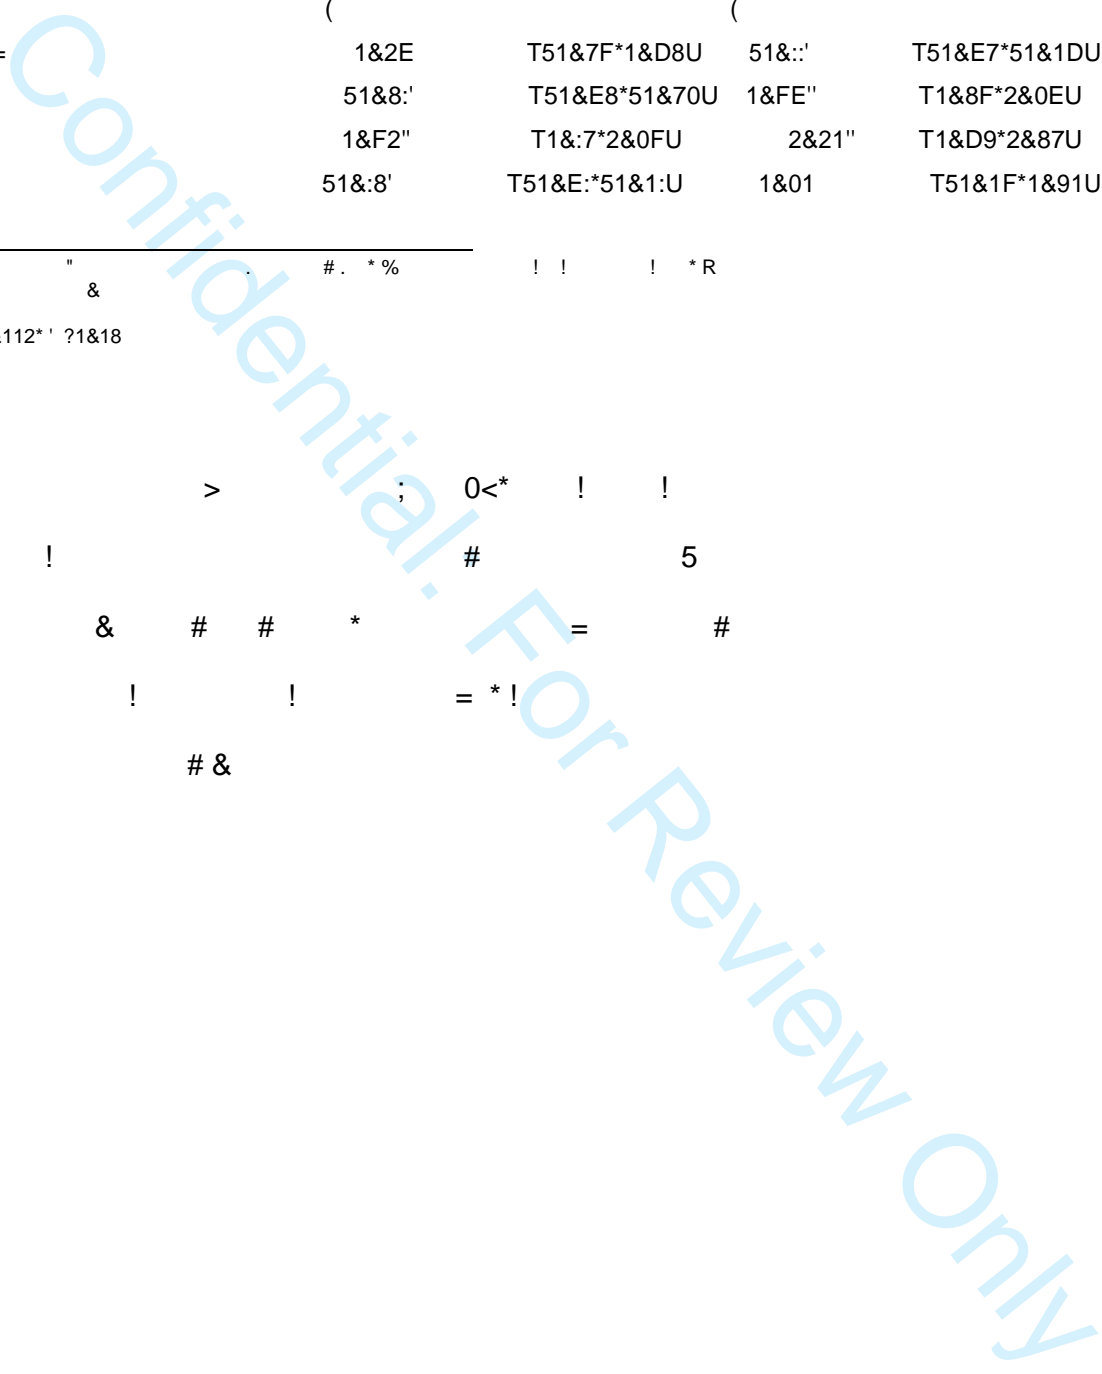

1  
2  
3  
4  
5  
6  
7  
8  
9  
10  
11  
12  
13  
14  
15  
16  
17  
18  
19  
20  
21  
22  
23  
24  
25  
26  
27  
28  
29  
30  
31  
32  
33  
34  
35  
36  
37  
38  
39  
40  
41  
42  
43  
44  
45  
46  
47

|            | \$ 8 . + \$ ) &\$ \$ "+\$ \$ ) "+\$ % % # ) * + # \$ ,&\$ \$ " \$ \$ |               |        |               |        |               |        |               |  |
|------------|----------------------------------------------------------------------|---------------|--------|---------------|--------|---------------|--------|---------------|--|
|            |                                                                      | 4             | 8      | 4             | 8      |               |        |               |  |
| >\$ \$     |                                                                      | F8 J -        | F8 J - | F8 J -        | F8 J - |               |        |               |  |
| \$         |                                                                      |               |        |               |        |               |        |               |  |
| /          | (                                                                    | (             | (      | (             | (      |               |        |               |  |
| !          | 51&:1"                                                               | T51&D51&2E    | 51&2   | T51&0D*1&     | 52&82" | T52&9(52&01   | 51&99" | T51&F51&89    |  |
|            | 57&2D"                                                               | T57&8(52&9E   | 52&18" | T52&:751&D!   | 5&E:"  | T58&7E&:D!    | 57&D9" | T50&1E7&0C    |  |
|            | 50&81"                                                               | T5&:2257&E!   | 52&D0" | T57&2!E2&1F   | 58&E1" | T5D&058&7C    | 57&9F" | T50&0E7&7:    |  |
| \$ # ! \$  |                                                                      |               |        |               |        |               |        |               |  |
| /          | (                                                                    | (             | (      | (             | (      |               |        |               |  |
| !          | 52&D0"                                                               | T52&E52&:2    | 51&EF" | T52&2E1&D'    | 57&D0" | T57&F57&0:    | 52&09" | T52&DE2&1!    |  |
|            | 50&02"                                                               | T50&88*50&1EU | 52&E:" | T57&2:*52&8:U | 5&E:"  | T58&27*5:&88U | 57&7F" | T57&D:*52&FDU |  |
|            | 5:&F8"                                                               | T58&0:*5:&8DU | 57&:!" | T57&E7*57&1DU | 5D&:D" | T5D&9F*5D&21U | 57&D2" | T50&1:*57&2EU |  |
| & # /=: 0  |                                                                      |               |        |               |        |               |        |               |  |
| #          | (                                                                    | (             | (      | (             | (      |               |        |               |  |
| #          | 7&FE"                                                                | T7&81*0&:8U   | 7&DF"  | T7&21*0&7EU   | :&DF"  | T:&0D*8&12U   | 0&92"  | T0&0:*&1EU    |  |
| # #        | 8&88"                                                                | T8&22*8&FFU   | :&01"  | T0&9E*:&E7U   | E&08"  | TE&12*E&DFU   | D&D:"  | TD&7E*9&11U   |  |
| " #        | 9&:8"                                                                | T9&10*9&EDU   | 8&9F"  | T8&7F*D&7EU   | 21&D8" | T21&7F*22&12U | E&2D"  | T9&97*E&D1U   |  |
|            | (                                                                    | (             | (      | (             | (      |               |        |               |  |
|            | 5:&D:"                                                               | T5:&ED*5:&:7U | 50&9E" | T5:&1F*50&:EU | 58&99" | T58&FE*58&8DU | 5:&12" | T5:&70*50&9EU |  |
| 3" \$ \$ " |                                                                      |               |        |               |        |               |        |               |  |
| # #        | (                                                                    | (             | (      | (             | (      |               |        |               |  |
|            | 50&9E"                                                               | T5:&17*50&88U | 57&D0" | T57&F8*57&01U | 57&99" | T50&1:*57&81U | 52&91" | T57&12*52&0FU |  |
| %          |                                                                      |               |        |               |        |               |        |               |  |
| 7 G #      | (                                                                    | (             | (      | (             | (      |               |        |               |  |
| Q2 G #     | 1&1                                                                  | T51&89*1&!    | 1&0    | T51&8E*2&     | 1&1    | T51&DF*1&     | 51&0   | T52&:F*1&E    |  |





1  
2  
3  
4  
5  
6  
7  
8  
9  
10  
11  
12  
13  
14  
15  
16  
17  
18  
19  
20  
21  
22  
23  
24  
25  
26  
27  
28  
29  
30  
31  
32  
33  
34  
35  
36  
37  
38  
39  
40  
41  
42  
43  
44  
45  
46  
47  
48  
49  
50  
51  
52  
53  
54  
55  
56  
57  
58  
59  
60

! ! ! # #  
5 & # !  
! ! ! 5  
01 # # > ;@ 2<& "  
! & !  
! &  
# " !  
! \* # # # =  
! # # ! "  
. & # ! # !  
! ! ! " # #  
| # | = #!  
= & ! >  
\* #\* L #& 5  
! ! !  
\* # & "  
# \*  
! ! ! &  
! ! # \* ! . # \*  
! # # &  
!  
# \* ! & #  
! \* ! 01 02  
# ; < 7128\* ! #

Confidential: For Review Only

1  
2  
3  
4  
5  
6  
7  
8  
9  
10  
11  
12  
13  
14  
15  
16  
17  
18  
19  
20  
21  
22  
23  
24  
25  
26  
27  
28  
29  
30  
31  
32  
33  
34  
35  
36  
37  
38  
39  
40  
41  
42  
43  
44  
45  
46  
47  
48  
49  
50  
51  
52  
53  
54  
55  
56  
57  
58  
59  
60

! 07& ! #

# 02 000: & \$ "#

" \* \* # \* !

# #\* \* # ! " # #

# ! ! - 00&

! ! ! ! "

! ! # !

; K < # ! "

; " \* # < 08 00& /

! ! ! ! \*

! 9& !

! # & . L

! ! 29 2F& ! =

# &

! ! ! \*

09 H ! ! # & #

" > \* #

& / ! # \* #

! # &

# " # !

= \* ! ,3 0E& ! \*

L #& >

# \* " #

#&

Confidential: For Review Only

1 \* # # #  
2  
3 & = # !  
4  
5 =# ! 5 !  
6  
7 # & #\* ! !  
8  
9 ! = ! ! ""  
10  
11 ! ! # &  
12  
13  
14 / > & / ! 5  
15  
16 # &  
17  
18 # #\* ! ! # !  
19  
20 L \* &  
21  
22 \* ! \* ! ;! #<  
23  
24 "# #\* #  
25  
26 # & ! 5 = 5  
27  
28 & # =  
29  
30 # & # H =# #  
31  
32 " |  
33  
34 L > #  
35  
36 & | #  
37  
38 &  
39  
40  
41  
42  
43  
44  
45  
46  
47  
48 / # \* \* #  
49  
50 # # !  
51  
52 # #\* # &  
53  
54  
55  
56  
57  
58  
59  
60

Confidential: For Review Only

1  
2  
3  
4  
5  
6  
7  
8  
9  
10  
11  
12  
13  
14  
15  
16  
17  
18  
19  
20  
21  
22  
23  
24  
25  
26  
27  
28  
29  
30  
31  
32  
33  
34  
35  
36  
37  
38  
39  
40  
41  
42  
43  
44  
45  
46  
47  
48  
49  
50  
51  
52  
53  
54  
55  
56  
57  
58  
59  
60

! ! ! \* H ! & @ ! "  
=  
! ! " (

\$ \$ \$ " @ \* & A  
K ! # # = &  
3 # ! &  
@ ! = ! ! > 5  
&

\$ " \$ A  
@ # # \* # # 5  
! # &  
# #  
! &  
# ! "  
# A

Confidential: For Review Only

1  
2  
3  
4  
5  
6  
7  
8  
9  
10  
11  
12  
13  
14  
15  
16  
17  
18  
19  
20  
21  
22  
23  
24  
25  
26  
27  
28  
29  
30  
31  
32  
33  
34  
35  
36  
37  
38  
39  
40  
41  
42  
43  
44  
45  
46  
47  
48  
49  
50  
51  
52  
53  
54  
55  
56  
57  
58  
59  
60

B #

#

( # ( & ! =

; < # \*

( \* A \* \$

&

) )

\$ W ! # " # & ()

> \* # \* !

&

@ \* # %

# ! .

7129 - # , # - . &

Confidential: For Review Only

1  
2  
3  
4  
5  
6  
7  
8  
9  
10  
11  
12  
13  
14  
15  
16  
17  
18  
19  
20  
21  
22  
23  
24  
25  
26  
27  
28  
29  
30  
31  
32  
33  
34  
35  
36  
37  
38  
39  
40  
41  
42  
43  
44  
45  
46  
47  
48  
49  
50  
51  
52  
53  
54  
55  
56  
57  
58  
59  
60

)

2& \$-\* !# %\* +\* &/ 4 .

! & 712DI0E9;2110D<47:7059E& 4 21&212DG 12:15D90D;2D<1189F5&

T / @ 4 712DG18G2:U

7& (- - & - ( (# - - I 7129 T 4

4GG!!!& ! & G G21D70F1 D 7129&

0&/= , # &/= #&/= 4/= , # 712D&

:& X " " Y (& 5 & 4 5 \*- @\* @ Z \* &\* & "

- 5 4 \*% \$ & 4

712:4292050E&

8& +3\* (\* . [\* & % 4 / ! #

( !& 712DI8F;:\* <4 :F5 D1& 4

4GG & G21&212DG>&> &712D&1D&171

D& 3 # -.& 4 # #

& 7119ID7;7<4F8521E& 4 21&2109G111051DD=&D7&7&

T / @ 4 7119G17G7EU

9& H# # " 3\* ! .& -# # ! 5 4 5 5

#& 7129I2;2<42F57D& 4 21&212DG 70875

:D:7;29<0112252

E& \* \*% -\* &@ # # ! 5

4 @ # & ! " ! #

7129IE1; -<4218528& 4 4GG & G21&212DG>& # &7129&1D&1D:

F& (> \*% \$ (\* (& # ! 5

& 2FF7I72;:<4:925E8& 4 21&2119G 12809EFE

1 21& \$ \ @+\* % \$\* \* & 5 -  
2  
3 & 4 5 \* - @\* @ Z \* &\* & " - 5 4  
4  
5 \*% \$ & 4 712:427825  
6  
7 018&  
8  
9 22& # \$\*% \*\$ \* & - " 4 # !  
10  
11 5 # & \$% &\$ % 712:10:E 4 21&220DG >& 2282  
12  
13 27& @ \* # & ! > ! \* !  
14  
15 ! 4 5 #& '(  
16  
17 712710;;<4827577& 4 21&21F0G G 177  
18  
19 20& 5 ! \* %\* .\* & \* = # #  
20  
21 4 5 # & (  
22  
23 ( ! 712118479& 4 21&22EDG29:958F9=58579 T /  
24  
25 @ 4 7121G22G27U  
26  
27 2:& - \* " 3.\* - -\* & . ]  
28  
29 # ! 5 # 4 H & ' )\*)  
30  
31 7129I27;7<4 129271D& 4 21&2092G> & &129271D  
32  
33 28& . .& " ^  
34  
35 '( \* 7119I21;;<4:7757E& 4 21&2129G 20DEFE111978E881 T / @ 4  
36  
37 1:G12U  
38  
39 2D& , %\* !/ -\$\* - " \$\* & ! # #\* #  
40  
41 # ! & ' '  
42  
43 7119I:7;21<4E8258D& 4 21&2119G 112795119517075=  
44  
45 29& @ +\* !# -& #) A \* \* # 5 &  
46  
47 " 711DI2D;0<408059E& 4 21&2222G>&2807599F8&711D&11:FE&=  
48  
49  
50  
51  
52  
53  
54  
55  
56  
57  
58  
59  
60

1 2E& %\* \* . \* & # !  
2  
3 ! & ' ! ! % 712DIE9; -<4D521& 4  
4  
5 4GG & G21&212DG>&# &712D&17&172  
6  
7 2F& \* \* \* & . # ! 5 &  
8  
9 7121I00;2<42905ED& 4GG & G21&212DG>& &711F&10&120  
10  
11 71& . \* . & - 5 4 # ( ! . & + "  
12  
13 7110ID2;2<48F59E& 4 21&2170G 421727E:728E12  
14  
15 72& ( \* + \* \* & % % 4 # ( !  
16  
17 & , 7129I7D;F<470:F5D7& 4 21&2119G 21E7D51295  
18  
19 198:51  
20  
21 77& - - & /, ^ #& 4,3 \*  
22  
23 712D&  
24  
25 70& (\* . \* @ ! " (\* & ! "5 % 5 ; % <4  
26  
27 ,3 & - ) 7119I84D05D0& 4  
28  
29 21&22EDG2:9959878585D0  
30  
31 7:& @\* ! 5 ! \* " +& ! "5 % 5 ; % <  
32  
33 4 | 7128 T 4  
34  
35 4GG!!!& & G G G7D9E 95  
36  
37 % J71, J71\$ J71) J717J71% #J717128& 2F / 7129&  
38  
39 78& % 3\* \* . \* & # # #  
40  
41 2252D # 4 % # 7120 5 -  
42  
43 ; -< # & \$% '( 712DI2D48DF& 4 21&22EDG 27EEF512D507205E  
44  
45 7D& %.\* /" # \* - # \* & # # # # L  
46  
47 / ; -< #4 #& \$ .  
48  
49 7112I08;:<47D059& T / @ 4 7112G19G02U  
50  
51  
52  
53  
54  
55  
56  
57  
58  
59  
60



1 79& /! & ( /! #G) R & , # 4 ( -  
2  
3 ; % . - < 2FFD&  
4  
5 7E& - " -( \* 3( \* \$ \$ \* & # H  
6  
7 4 5 # & ' - 7121I78;7<4D85E0& 4  
8  
9 21&2109G 11712:F  
10  
11 7F& - . \$ & . 7128  
12  
13 T 4  
14  
15 4GG!!!& & "G G G# G G G:D89F2G  
16  
17 7128 5 ( &  
18  
19 01& / & % 5 4 A  
20  
21 ! 5 & \* 7128&  
22  
23 02& / & A ! 5 4 / I 7129  
24  
25 T 4  
26  
27 4GG!!!& & & "G #G ! G G# !  
28  
29 G7129 21 7129&  
30  
31 07& @ \* % & # & . \* 7128&  
32  
33 00& - - \* \$ (\* # +& 5 - ; -< # 4  
34  
35 " \* % # % # 711FG21 #& 4 - (, 7121&  
36  
37 0:& " @ \* % + \* 3 \* & 5 - ; -< 71205712:  
38  
39 712: T 4 !!!& & &  
40  
41 08& " - . \* " ! + \* " \* & 5 ` 5(  
42  
43 4 @ @ , # \* , 3 . #&  
44  
45 712:I0;;;<482E50E& 4 21&2299G1797:02D208121E7  
46  
47 0D& " - . \* " ! + \* 3 # + \* & % , \* \* 5 4  
48  
49 - 5 @ @ , 3 . #& '(  
50  
51 7128I218;2<429059F& 4 21&7218G + &7120&0129E0  
52  
53  
54  
55  
56  
57  
58  
59  
60

1  
2  
3  
4  
5  
6  
7  
8  
9  
10  
11  
12  
13  
14  
15  
16  
17  
18  
19  
20  
21  
22  
23  
24  
25  
26  
27  
28  
29  
30  
31  
32  
33  
34  
35  
36  
37  
38  
39  
40  
41  
42  
43  
44  
45  
46  
47  
48  
49  
50  
51  
52  
53  
54  
55  
56  
57  
58  
59  
60

09& - - \* - [ \* # % \* & ! 5  
# & 711FG7121 #& 5  
; -< #& "4 / ( / \* 71274787&  
0E& # \* @ H & - % - 4 # ^  
( @ ,3 % - #&  
712DI88;F<49925E0& 4 21&212DG>&> &712D&18&12F

Confidential: For Review Only

1  
2  
3  
4  
5  
6  
7  
8  
9  
10  
11  
12  
13  
14  
15  
16  
17  
18  
19  
20  
21  
22  
23  
24  
25  
26  
27  
28  
29  
30  
31  
32  
33  
34  
35  
36  
37  
38  
39  
40  
41  
42  
43  
44  
45  
46  
47  
48  
49  
50  
51  
52  
53  
54  
55  
56  
57  
58  
59  
60

FIGURE 1

Relationship between wellbeing and health behaviours: (A) Risk Factors (B) Protective Factors

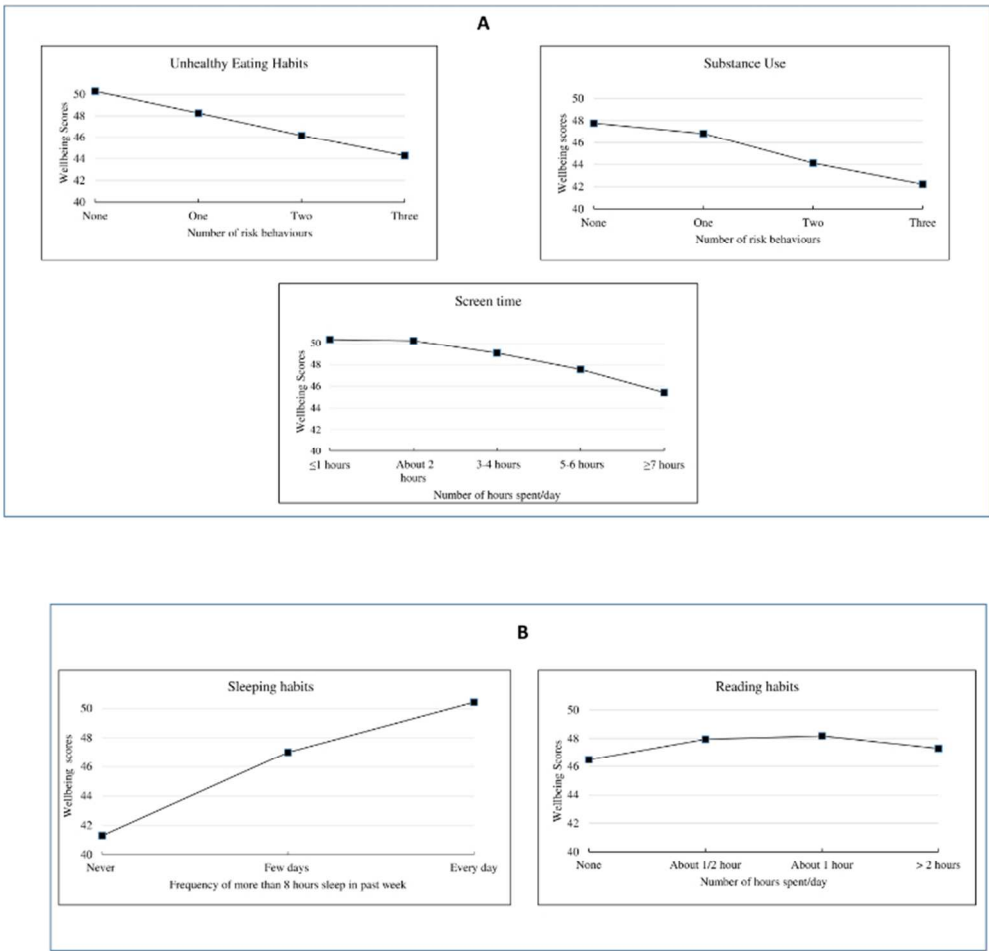

ew Only

APPENDIX A

(i) VARIABLE DESCRIPTION

| Composite variables              | Original variables                                                                                                                                                                                                                                                                                                    | Variable labels              | Composite variables                                                                                                                                                                                                                                                                                                                                                                                                                                                                                                                                                                                                                                                                                                                                                                                                                                                                                                                                          |
|----------------------------------|-----------------------------------------------------------------------------------------------------------------------------------------------------------------------------------------------------------------------------------------------------------------------------------------------------------------------|------------------------------|--------------------------------------------------------------------------------------------------------------------------------------------------------------------------------------------------------------------------------------------------------------------------------------------------------------------------------------------------------------------------------------------------------------------------------------------------------------------------------------------------------------------------------------------------------------------------------------------------------------------------------------------------------------------------------------------------------------------------------------------------------------------------------------------------------------------------------------------------------------------------------------------------------------------------------------------------------------|
| Substance use risk <sup>6</sup>  | Definitions were:<br>Smoking: Cigarette smoking status (currently smoke)<br>Drinking: Alcohol drinking status (Usually have an alcoholic drink once a month or more frequently)<br>Cannabis: Cannabis use status (Ever tried cannabis)                                                                                | SmkSt2<br>alcfrq1<br>Cantry  | Alcohol + smoking + cannabis<br>(1) Smoking risk: If currently smokes (2) Drinking risk: drinks once a month or more frequently (3) Cannabis risk: If ever tried cannabis. Each item was coded 0 for “no” and 1 for “yes”. The composite score obtained ranged from zero to three based on the number of risk behaviours; (0= None, 1= Only one, 2 =Any two and 3 =All three)                                                                                                                                                                                                                                                                                                                                                                                                                                                                                                                                                                                |
| Physical Activity <sup>7,8</sup> | Physical activity: in line with general recommendations<br>How many days physically active for 60+ minutes in last 7 days ( Active for more than 5 days )<br>How often usually exercise in free time (Active for more than twice a week)<br>How many hours usually exercise in free time (Active for an hour or more) | Physact<br>ExerOf<br>ExerHrs | Duration of exercise + Frequency of exercise + Number of days met recommended guidelines<br>The first question on moderate to vigorous physical activity was “Over the past 7 days, on how many days you were physically active for a total of at least 60 minutes per day and responses ranged from 0 to 7. Second, the participants were asked “Outside school hours: how often do you usually exercise in your free time so much that you get out of breath or sweat?” with responses from less than a once a month to every day. The question on duration was “Outside school hours: how many hours do you usually exercise in your free time so much that you get out of breath or sweat?”, with responses from none to 7 or more hours. Adolescents who exercised for more than twice a week for an hour or more or were physically active for 60+ minutes for at least 5 days were classified as “physically active” and the rest “physical inactive” |
| Sleeping habits <sup>9,10</sup>  | Sleeping frequency in last week<br>How often slept 8+ hours per night in last 7 days                                                                                                                                                                                                                                  | Sleep8pn                     | The question was “Over the past 7 days, how often did you sleep for 8 hours or more” and the responses were “every day”, “most days”, “some days” and “not in the past 7 days”.                                                                                                                                                                                                                                                                                                                                                                                                                                                                                                                                                                                                                                                                                                                                                                              |

Eating Habits<sup>11-13</sup>

Definition of each unhealthy eating habits were:

Breakfast consumption+ take away food + 5 Aday

How often eaten takeaway food in last 7 days (unhealthy habit if taken takeaway in past seven days)

Eattake

(1) Skipping Breakfast: If avoided breakfast in last 7 days (2) Poor diet consumed less than 5 portions of fruits and vegetables a day (3) Takeaway

How often eaten breakfast in last 7 days (unhealthy habit if breakfast not taken regularly)

Eatbfst

food: If consumed takeaway food in past 7 days. Each item was coded 0 for "no" and 1 for "yes". According to the number of unhealthy eating

Consumed more than five portions of fruit and veg yesterday (unhealthy habit if 5-A-DAY not taken regularly)

FV5ormor

habits participant's exhibited, a risk score from zero to three (0= None, 1= Only one, 2 =Any two and 3 =All three) was given

Screen time<sup>8 14-16</sup>

Definitions of screentime derived as follows (Weekend and weekday hours combined)

TV+\_computer games + internet

Hours per day watching TV

Watchwk,

FOR ALL, Response options for each item were 'none at all', 'about 1

Hours per day spent playing computer games

Watchwe

an hour a day', 'about 1 hour a day', 'about 2 hours a day', 'about 3 hours

Hours per day spent on computers for communicating or homework

Compwk,

a day', 'about 4 hours a day', 'about 5 hours a day', 'about 6 hours a day'

Hours per day spent on smart phone

Compwe

and 'about 7 or more hours a day'. The total screen time was calculated by

Smartwk,

grouping the similar options of each item and by combining both

Smartwe

ZHHNHQGV DQG ZHHNGD\V 6XEMHFWV ZHU

Reading<sup>17</sup>

Definitions of reading derived as follows:

Reading hours (weekend + weekdays)

Hours per day spent reading outside school hours

Readwk,

"About how many hours a day do you usually spend sitting down read

Readwe

books, magazines or newspapers (including e-readers, online newspapers,

and magazines) and studying when you are not at school?". The questions were asked for weekends and weekdays separately. The response options

UDQJHG IURP QRQH WR KRUV SHU G

Bullying<sup>18 19</sup>

Frequency with which the behaviour occurred over the past couple of months:

Traditional bullying (physical+ verbal + relational)

|                                                                                                                  |        |
|------------------------------------------------------------------------------------------------------------------|--------|
| I was called mean names, was made fun of, or teased in a hurtful way                                             | Blynam |
| Other people left me out of things on purpose, excluded me from their group of friends, or completely ignored me | Blyout |
| I was hit, kicked, pushed, shoved around, or locked indoors                                                      | Blyhit |
| Other people lied or spread rumours                                                                              | Blylie |
| Made fun of me because of weight                                                                                 | Blyfun |
| Sexual jokes/comments                                                                                            | Blysex |

Bullying measure was meant to assess the extent to which they had recently experienced other children directing different types of bullying towards themselves. Six statements reflecting traditional bullying (physical, verbal, and relational) were asked. Questions were rated by participants using a 5-point response scale that ranged from 0="I haven't been bullied this way in the past couple of months" 1="It has happened once or twice", 2="2 or 3 times a month", 3="2 or 3 times a week", to 4="Several times a week."

(ii) Individual Items and scoring of Warwick-Edinburgh Mental Well-being scale (WEMWBS)

1. I've been feeling optimistic about the future
2. I've been feeling useful
3. I've been feeling relaxed
4. I've been feeling interested in other people
5. I've had energy to spare
6. I've been dealing with problems well
7. I've been thinking clearly
8. I've been feeling good about myself
9. I've been feeling close to other people
10. I've been feeling confident
11. I've been able to make up my own mind about things
12. I've been feeling loved
13. I've been interested in new things
14. I've been feeling cheerful

Each of the 14 item responses in WEMWBS are scored from 1 (none of the time), 2 (rarely), 3 (some of the time), 4 (often) to 5 (all of the time). A total scale score is calculated by summing the 14 individual item scores.

## REFERENCES

1. Farmer S, Hanratty B. The relationship between subjective wellbeing, low income and substance use among schoolchildren in the north west of England: cross-sectional study. *Journal of Public Health* 2012;34(4):512-22. doi: 10.1093/pubmed/fds022
2. Phillips-Howard PA, Bellis MA, Briant LB, et al. Wellbeing, alcohol use and sexual activity in young teenagers: findings from a cross-sectional survey in school children in North West England. *Substance abuse treatment, prevention, and policy* 2010;5:27. doi: 10.1186/1747-597x-5-27 [published Online First: 2010/11/11]
3. Newcomb MD, Bentler PM, Collins G. Alcohol Use and Dissatisfaction with Self and Life: A Longitudinal Analysis of Young Adults. *Journal of Drug Issues* 1986;16(4):479-94. doi: 10.1177/002204268601600401
4. Bergman MM, Scott J. Young adolescent wellbeing and health behaviours: gender and socio-economic differences. *Journal of Adolescence* 2001;24(2):183-97. doi: <https://doi.org/10.1006/jado.2001.0378>
5. Taylor G, McNeill A, Girling A, et al. Change in mental health after smoking cessation: systematic review and analysis. *BMJ : British Medical Journal* 2014;348 doi: 10.1136/bmj.g1151
6. Booker CL, Skew AJ, Sacker A, et al. Well-Being in Adolescence—An Association With Realized Behaviors: Findings From Understanding Society, the UK Household Longitudinal Study. *The Journal of Early Adolescence* 2014;34(4):518-38. doi: 10.1177/0272431613501082
7. Ussher MH, Owen CG, Cook DG, et al. The relationship between physical activity, sedentary behaviour and psychological wellbeing among adolescents. *Social Psychiatry and Psychiatric Epidemiology* 2007;42(10):851-56. doi: 10.1007/s00127-007-0232-x
8. Booker CL, Skew AJ, Kelly YJ, et al. Media Use, Sports Participation, and Well-Being in Adolescence: Cross-Sectional Findings From the UK Household Longitudinal Study. *American Journal of Public Health* 2015;105(1):173-9. doi: 10.2105/AJPH.2013.301783
9. Fuligni AJ, Hardway C. Daily Variation in Adolescents' Sleep, Activities, and Psychological Well-Being. *Journal of Research on Adolescence* 2006;16(3):353-78. doi: 10.1111/j.1532-7795.2006.00498.x
10. James S, Hale L. Sleep Duration and Child Wellbeing: A Nonlinear Association. *Journal of clinical child and adolescent psychology : the official journal for the Society of Clinical Child and Adolescent Psychology, American Psychological Association, Division 53* 2017;46(2):258-68. doi: 10.1080/15374416.2016.1204920
11. Rooney C, McKinley MC, Woodside JV. The potential role of fruit and vegetables in aspects of psychological wellbeing: a review of the literature and future directions. *Proceedings of the Nutrition Society* 2013;72(4):420-32. doi: 10.1017/S0029665113003388 [published Online First: 09/11]
12. Conner TS, Brookie KL, Carr AC, et al. Let them eat fruit! The effect of fruit and vegetable consumption on psychological well-being in young adults: A randomized controlled trial. *PLoS ONE* 2017;12(2):e0171206. doi: 10.1371/journal.pone.0171206
13. Lien L. Is breakfast consumption related to mental distress and academic performance in adolescents? *Public Health Nutrition* 2007;10(4):422-28. doi: 10.1017/S1368980007258550 [published Online First: 04/01]
14. Hoare E, Milton K, Foster C, et al. The associations between sedentary behaviour and mental health among adolescents: a systematic review. *International Journal of Behavioral Nutrition and Physical Activity* 2016;13(1):108. doi: 10.1186/s12966-016-0432-4
15. Przybylski AK, Weinstein N. A Large Scale Test of the Goldilocks Hypothesis: Quantifying the Relations Between Screen Use and the Mental Well-Being of Adolescents. *Psychological Science* 2017;28(2):204-15. doi: 10.1177/0956797616678438

- 1
- 2
- 3
- 4 16. Hamer M, Yates T, Sherar LB, et al. Association of after school sedentary behaviour in adolescence with mental wellbeing in adulthood. *Preventive Medicine* 2016;87(Supplement C):6-10. doi: <https://doi.org/10.1016/j.ypmed.2016.02.021>
- 5 17. Trainor S, Delfabbro P, Anderson S, et al. Leisure activities and adolescent psychological well-being. *Journal of Adolescence* 2009;33(1):173-86. doi:
- 6 <https://doi.org/10.1016/j.adolescence.2009.03.013>
- 7 18. Landstedt E, Persson S. Bullying, cyberbullying, and mental health in young people. *Scandinavian journal of public health* 2014;42(4):393-9. doi:
- 8 [10.1177/1403494814525004](https://doi.org/10.1177/1403494814525004) [published Online First: 2014/03/13]
- 9 19. Przybylski AK, Bowes L. Cyberbullying and adolescent well-being in England: a population-based cross-sectional study. *The Lancet Child & Adolescent Health* 2017;1(1):19-26. doi: [10.1016/S2352-4642\(17\)30011-1](https://doi.org/10.1016/S2352-4642(17)30011-1)
- 10
- 11
- 12
- 13
- 14
- 15
- 16
- 17
- 18
- 19
- 20
- 21
- 22
- 23
- 24
- 25
- 26
- 27
- 28
- 29
- 30
- 31
- 32
- 33
- 34
- 35
- 36
- 37
- 38
- 39
- 40
- 41
- 42
- 43
- 44
- 45
- 46
